# Supplementary material for: Development of Diagnostic Biomarkers for Detecting Diabetic Retinopathy at Early Stages Using Quantitative Proteomics
Source: Hindawi journal article supplement (doi:10.1155/2016/6571976), 2015-11-09

# Supplementary Figures

## **Supplementary Fig. 1. Functional analysis of 15 verified proteins from preliminary MRM analysis**

The 15 verified proteins from the preliminary MRM analysis were classified under the "biological process" and "molecular function" categories using the PANTHER classification program (A). The largest components in "biological process" were "immunity and defense" (33%) and "molecular function" (20%), respectively. To investigate the signaling pathway related to the 15 verified proteins, we conducted signaling pathway analysis. Consequently, 2 signaling pathways (actin cytoskeleton and complement cascade pathway) were selected from the KEGG database (B and C).

## **Supplementary Fig. 2. Correlation of peak area values between two peptides per protein**

The peak area values between two peptides per protein were compared in SQ-MRM experiments. The peak similarities of two peptides were analyzed by Pearson's correlation analysis. The patterns of peak intensity were highly correlated between two peptides in each protein showing the median value of 0.927.

### **Supplementary Fig. 3. Confirmation of synthesized heavy peptide using the MILDITOF**

To verify the 15 selected candidates, we first synthesized SIS peptides (>95% purity) for each protein and verified the purity by MALDI TOF analysis. All the SIS heavy peptides had the same theoretical and experimental molecular weight values.

### **Supplementary Fig. 4. Generation of calibration curve for 15 proteins**

To generate a calibration curve for the 15 proteins, heavy peptides were serially diluted (12 concentration points: 0.1–200 fmol) with the light peptide as an internal standard (digested pooled plasma protein: 1 µg) added into each serially diluted samples. Each experiment was repeated in triplicate to generate the calibration curve. The area ratio of heavy peptide (12 concentration points: 0.1–200 fmol) to light peptide (internal standard: plasma 1 µg) was determined from the extracted ion chromatogram (XIC) of each selected transition.

### **Supplementary Fig. 5. Evaluation of retention time stability in No DR, Mi NPDR, and Mo NPDR groups**

The CV% of retention time (RT) for 15 peptides are observed in NO DR (N: 20), Mi NPDR (N: 20), and Mo NPDR groups (N: 20). The CV% for RT in three groups is shown in a range of 0.87-8.35, 0.23-4.81, and 0.11-4.92 min, respectively. The averaged RT for 15 peptides (D) represent in a range of 12.6-46.4 min. The peptide of ITIH2\_VQSTITSR\_y6++ is a first eluted peptide in 15 peptides (12.6 min), while the peptide of APLP2\_WEPDPTGTK\_y7++ is a last eluted peptide (46.4 min). All images were extracted by Skyline program.

### **Supplementary Fig. 6. Selection of multi-marker panel by statistical analysis**

Multicollinearity among the 11 candidates was investigated using a linear regression analysis (A). To build multi-marker panel, stepwise MANOVA was employed to determine the suitability of candidates for inclusion in a multi-marker panel (B). From the stepwise MANOVA, 4 verified markers (ITIH2, APOA4, C7, and CLU) were selected and used to construct a multi-marker panel. Statistical validation was then performed using LOOCV.

### **Supplementary Fig. 7. Comparison of mean concentration in No DR, Mi NPDR, and Mo NPDR groups versus normal plasma concentration**

To assess the measured concentration from SID-MRM analysis in No DR (n=20), Mi NPDR (n=20), and Mo NPDR (n=20) groups, the each mean concentration level was compared to normal plasma concentration reported in the literatures. 15 proteins were ordered from highest-to-lowest abundance with the LLOQ of each corresponding assay.

## **Supplementary Table Legends**

### **Supplementary Table 1. Characteristics of clinical plasma samples in the No DR, Mi NPDR, and Mo NPDR groups**

**Supplementary Table 2. Statistics for clinical plasma sample in the No DR, Mi NPDR, and Mo NPDR groups**

**Supplementary Table 3. Identified human vitreous proteome in MH, NPDR, and PDR groups**

**Supplementary Table 4. Differentially expressed proteins in human vitreous**

**Supplementary Table 5. Data-mining for MRM target selection in human vitreous**

**Supplementary Table 6. Selection of reliable transitions for MRM analysis**

## Supplementary Fig. 1

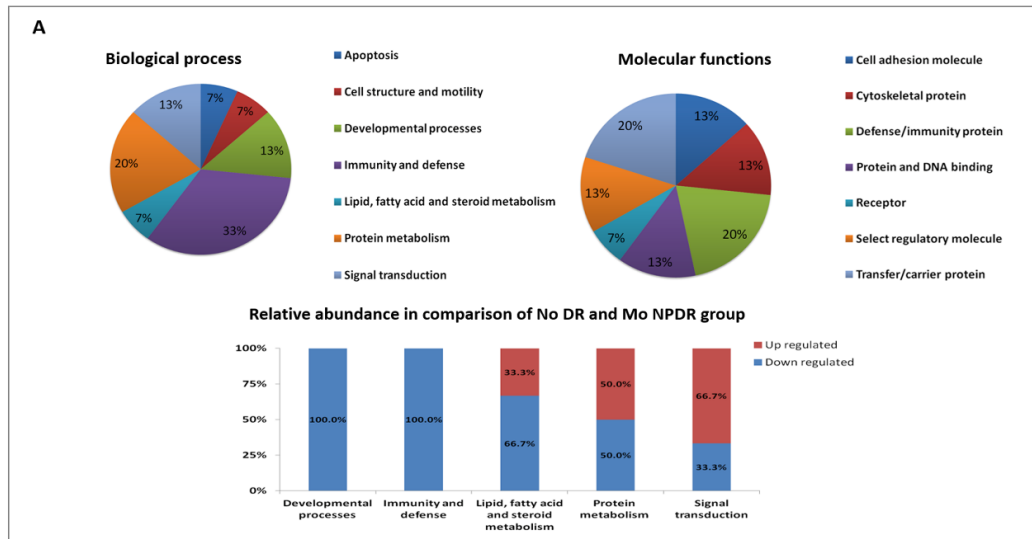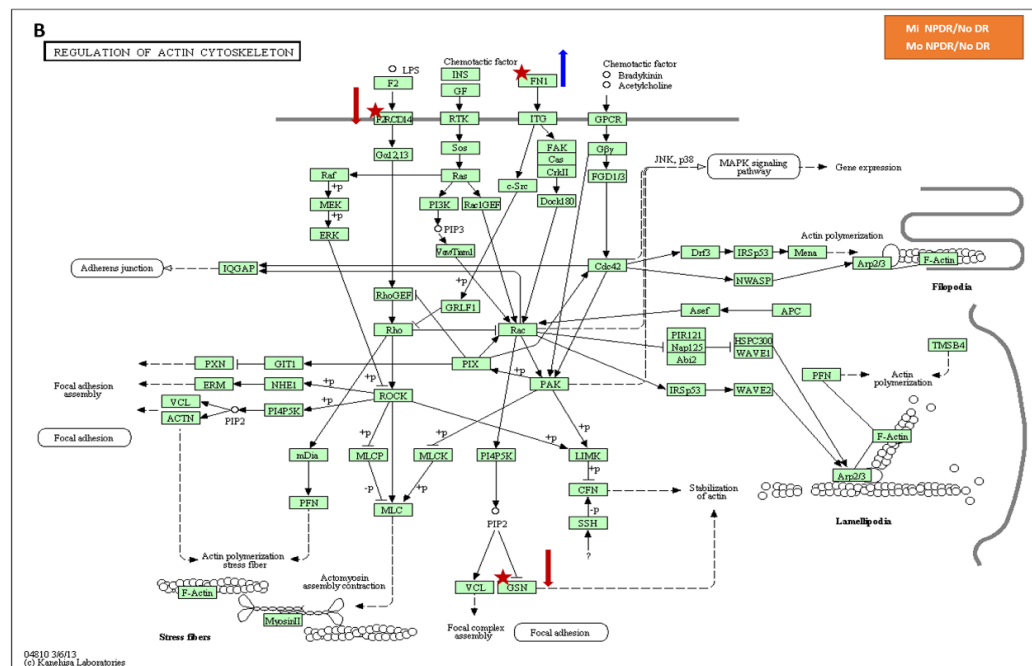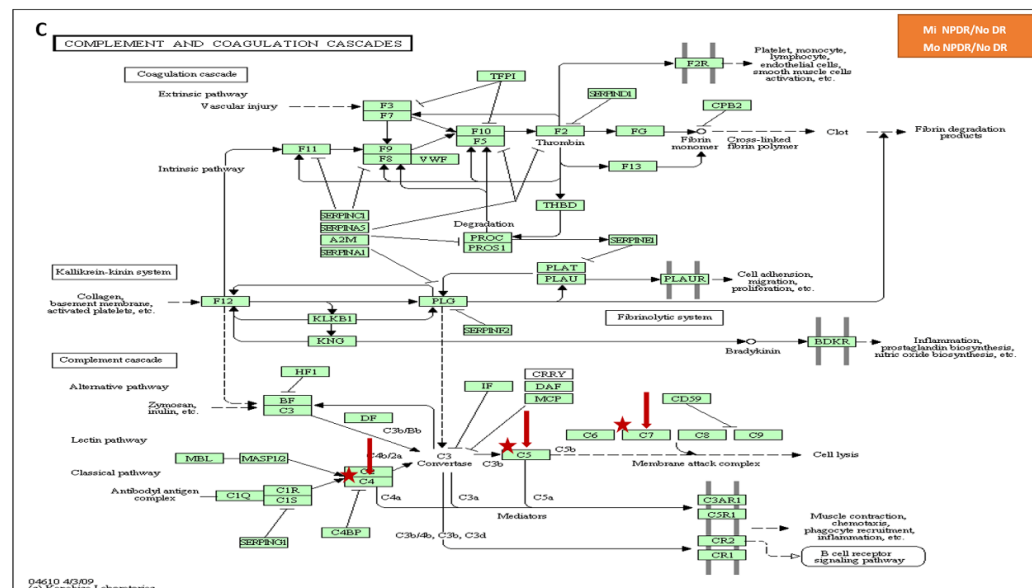

Supplementary Fig. 2

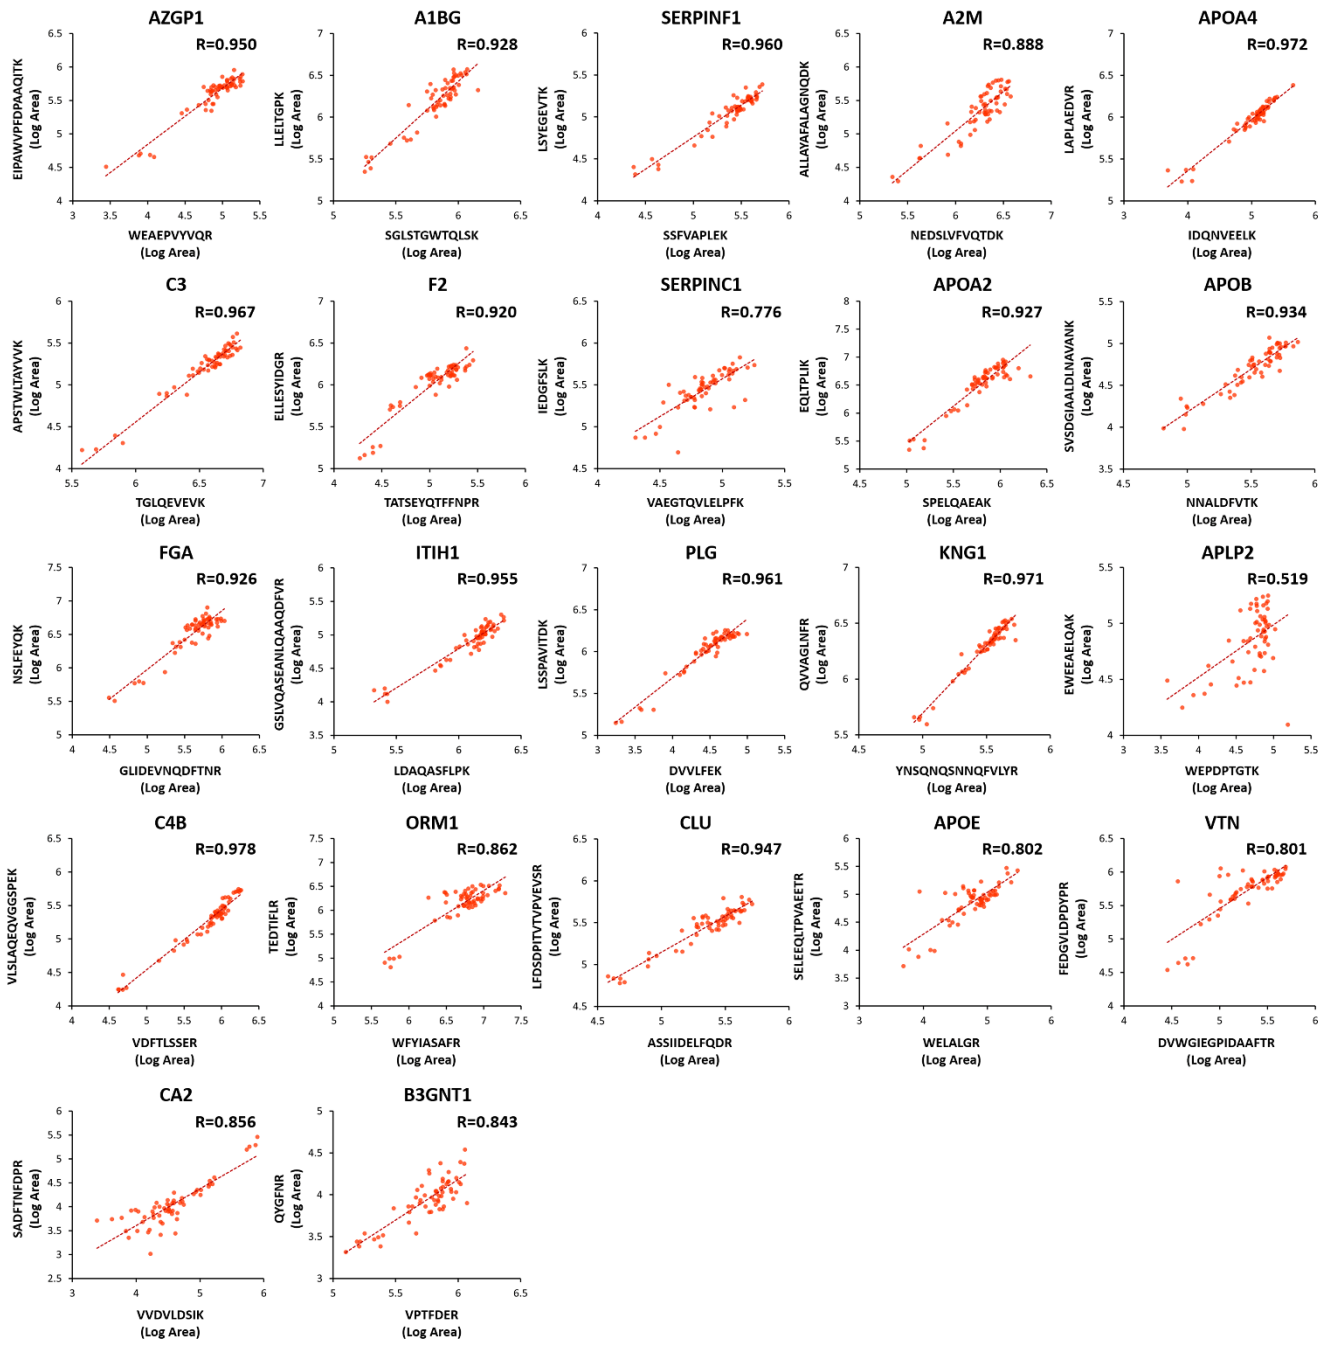

**Supplementary Fig. 3**



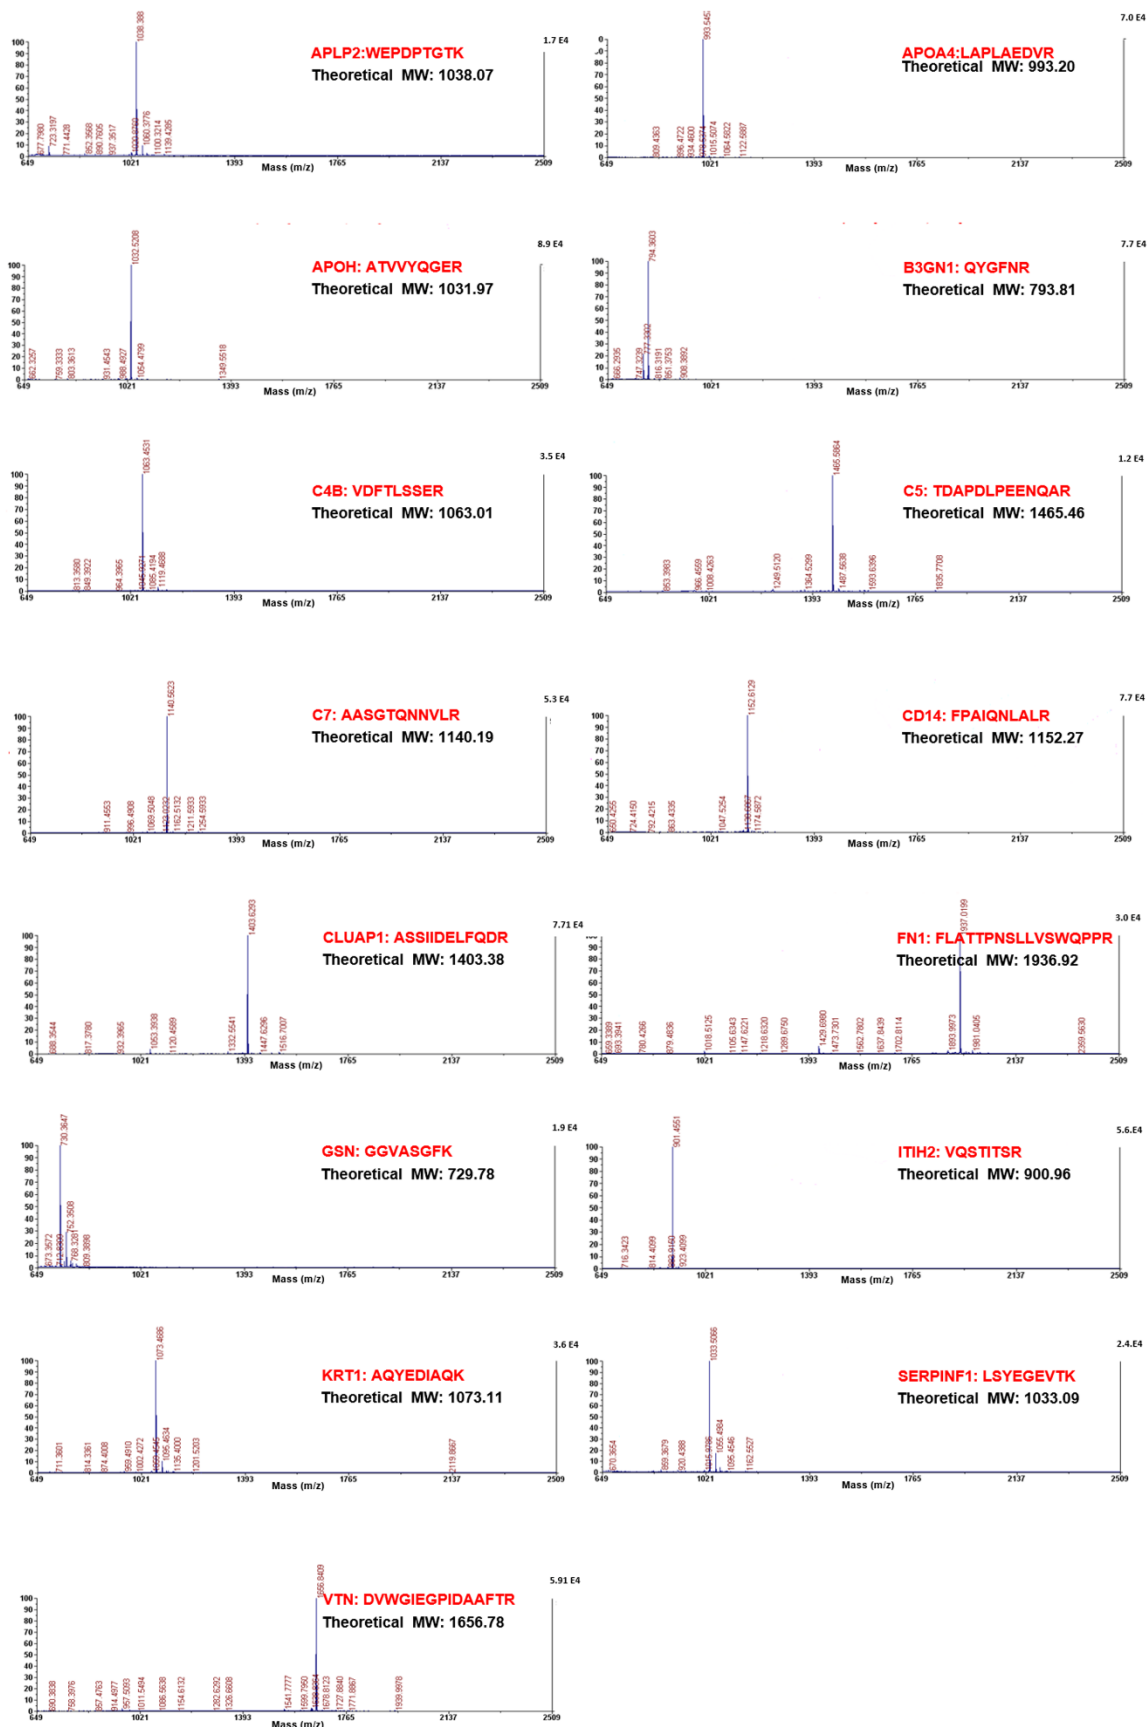

## Supplementary Fig. 4

A

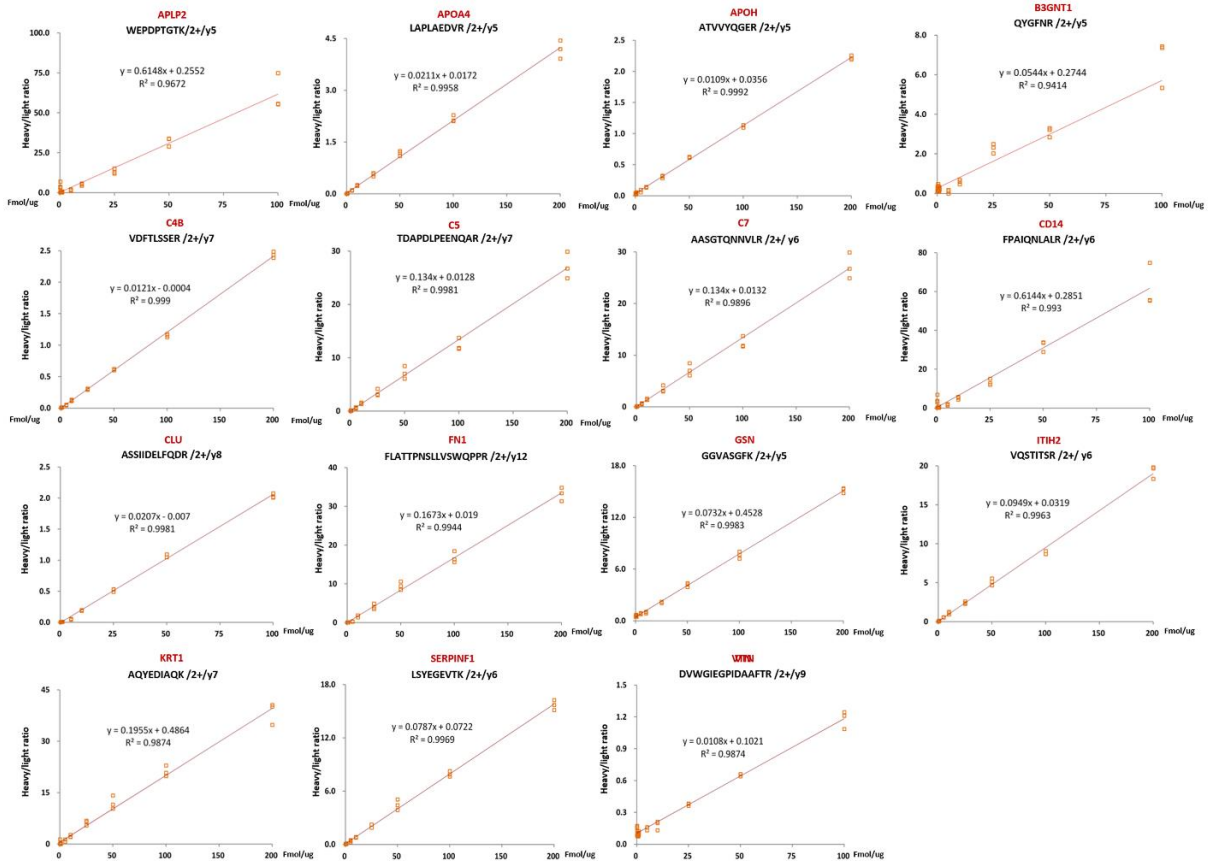

B

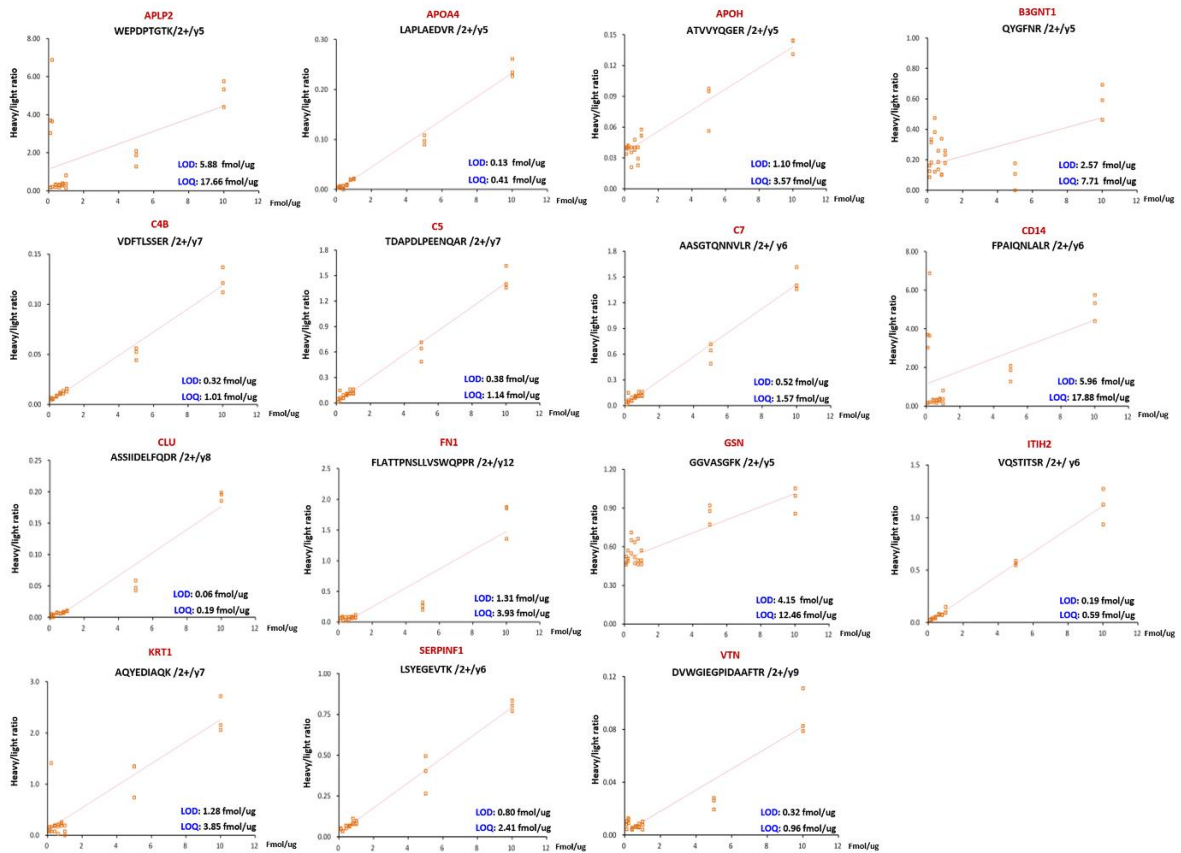

Supplementary Fig. 5

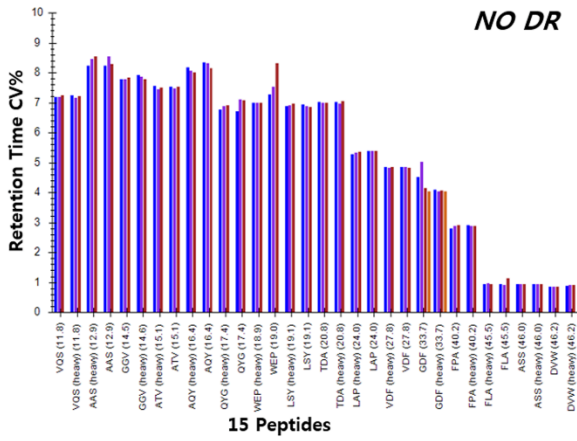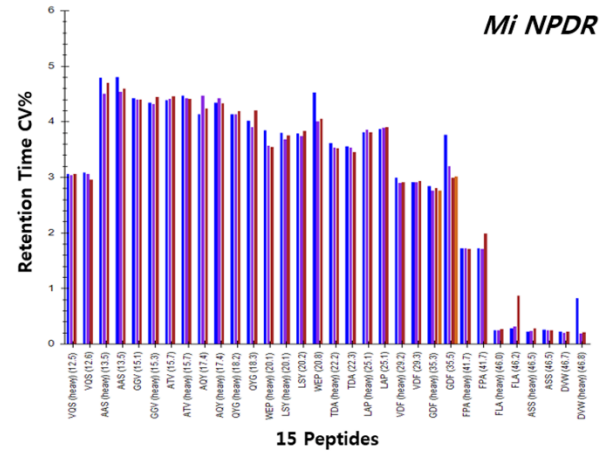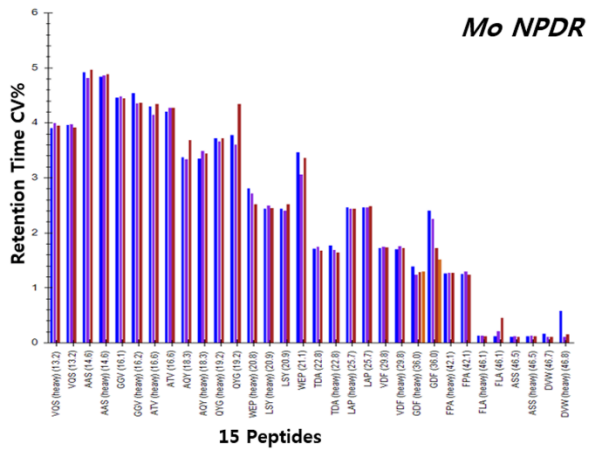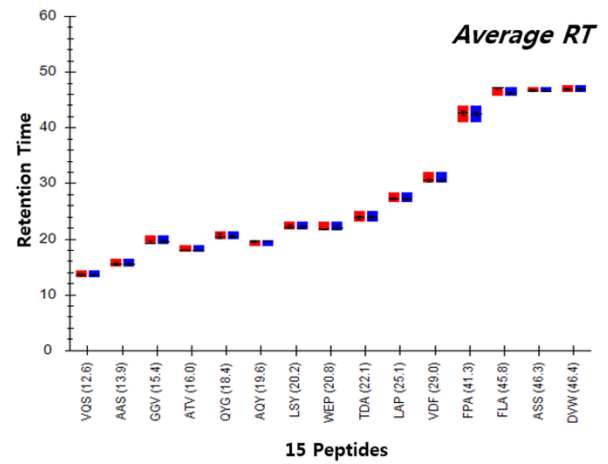

**Supplementary Fig. 6**

A

Coefficients<sup>a</sup>

| Model |            | Unstandardized Coefficients |            | Standardized Coefficients | t      | Sig. | Collinearity Statistics |       |
|-------|------------|-----------------------------|------------|---------------------------|--------|------|-------------------------|-------|
|       |            | B                           | Std. Error | Beta                      |        |      | Tolerance               | VIF   |
| 1     | (Constant) | .449                        | .212       |                           | 2.121  | .043 |                         |       |
|       | APOA4      | .003                        | .001       | .251                      | 1.946  | .062 | .307                    | 3.261 |
|       | APOH       | .002                        | .001       | .313                      | 1.626  | .115 | .138                    | 7.270 |
|       | B3GNT1     | -.002                       | .005       | -.073                     | -.482  | .634 | .224                    | 4.466 |
|       | C4B        | .000                        | .001       | .040                      | .321   | .751 | .324                    | 3.089 |
|       | C5         | -.001                       | .001       | -.089                     | -.723  | .475 | .338                    | 2.962 |
|       | C7         | -.031                       | .012       | -.482                     | -2.666 | .013 | .156                    | 6.394 |
|       | CD14       | -.048                       | .038       | -.146                     | -1.272 | .214 | .387                    | 2.586 |
|       | CLU        | .006                        | .002       | .330                      | 2.841  | .008 | .379                    | 2.642 |
|       | GSN        | -.012                       | .007       | -.236                     | -1.622 | .116 | .242                    | 4.134 |
|       | ITIH2      | -.007                       | .005       | -.219                     | -1.475 | .151 | .233                    | 4.300 |
|       | KRT1       | -.010                       | .009       | -.103                     | -1.159 | .256 | .651                    | 1.537 |

a. Dependent Variable: Group

B

Variables in the Analysis

| Step |       | Tolerance | F to Remove | Wilks' Lambda |
|------|-------|-----------|-------------|---------------|
| 1    | ITIH2 | 1.000     | 40.152      |               |
| 2    | ITIH2 | .857      | 51.548      | .828          |
|      | APOA4 | .857      | 15.026      | .486          |
| 3    | ITIH2 | .727      | 9.275       | .347          |
|      | APOA4 | .676      | 24.066      | .460          |
|      | C7    | .583      | 9.130       | .346          |
| 4    | ITIH2 | .727      | 6.326       | .233          |
|      | APOA4 | .626      | 5.597       | .229          |
|      | C7    | .406      | 20.886      | .315          |
|      | CLU   | .452      | 13.928      | .276          |

Variables Not in the Analysis

| Step |        | Tolerance | Min. Tolerance | F to Enter | Wilks' Lambda |
|------|--------|-----------|----------------|------------|---------------|
| 0    | APOA4  | 1.000     | 1.000          | 7.918      | .828          |
|      | APOH   | 1.000     | 1.000          | 6.952      | .845          |
|      | B3GNT1 | 1.000     | 1.000          | 16.692     | .695          |
|      | C4B    | 1.000     | 1.000          | 8.642      | .815          |
|      | C5     | 1.000     | 1.000          | 16.639     | .695          |
|      | C7     | 1.000     | 1.000          | 25.408     | .599          |
|      | CD14   | 1.000     | 1.000          | 7.586      | .834          |
|      | CLU    | 1.000     | 1.000          | 6.846      | .847          |
|      | GSN    | 1.000     | 1.000          | 12.836     | .748          |
|      | ITIH2  | 1.000     | 1.000          | 40.152     | .486          |
|      | KRT1   | 1.000     | 1.000          | 5.106      | .882          |
| 1    | APOA4  | .857      | .857           | 15.026     | .346          |
|      | APOH   | .537      | .537           | 2.470      | .456          |
|      | B3GNT1 | .755      | .755           | .563       | .479          |
|      | C4B    | .927      | .927           | .769       | .476          |
|      | C5     | .853      | .853           | 1.504      | .467          |
|      | C7     | .739      | .739           | 2.089      | .460          |
|      | CD14   | .942      | .942           | .759       | .476          |
|      | CLU    | .843      | .843           | 14.740     | .348          |
|      | GSN    | .716      | .716           | .028       | .486          |
|      | KRT1   | .967      | .967           | .599       | .478          |
| 2    | APOH   | .357      | .357           | .477       | .341          |
|      | B3GNT1 | .639      | .639           | 4.199      | .310          |
|      | C4B    | .890      | .822           | 1.964      | .328          |
|      | C5     | .740      | .740           | 5.547      | .300          |
|      | C7     | .583      | .583           | 9.130      | .276          |
|      | CD14   | .785      | .714           | 4.988      | .304          |
|      | CLU    | .648      | .648           | 3.511      | .315          |
|      | GSN    | .592      | .592           | 2.654      | .322          |
|      | KRT1   | .889      | .788           | 2.637      | .322          |
| 3    | APOH   | .220      | .220           | 1.735      | .263          |
|      | B3GNT1 | .428      | .391           | .114       | .275          |
|      | C4B    | .591      | .388           | .142       | .275          |
|      | C5     | .687      | .542           | 1.997      | .261          |
|      | CD14   | .751      | .539           | 6.682      | .232          |
|      | CLU    | .452      | .406           | 13.928     | .197          |
|      | GSN    | .507      | .499           | .209       | .274          |
|      | KRT1   | .851      | .559           | .812       | .270          |
| 4    | APOH   | .220      | .220           | 1.670      | .188          |
|      | B3GNT1 | .396      | .338           | 1.408      | .189          |
|      | C4B    | .549      | .335           | .285       | .196          |
|      | C5     | .670      | .398           | 2.845      | .182          |
|      | CD14   | .739      | .402           | 3.159      | .181          |
|      | GSN    | .504      | .373           | .386       | .195          |
|      | KRT1   | .829      | .403           | 1.612      | .188          |

IBM SPSS Statistics (IBM Inc., USA, version 20)

- We have performed stepwise MANOVA to determine more reliable candidates for constructing a multi-marker panel.
- **ITIH2, APOA4, C7, and CLU** are finally selected in analysis of stepwise MANOVA



**Supplementary Fig. 7**



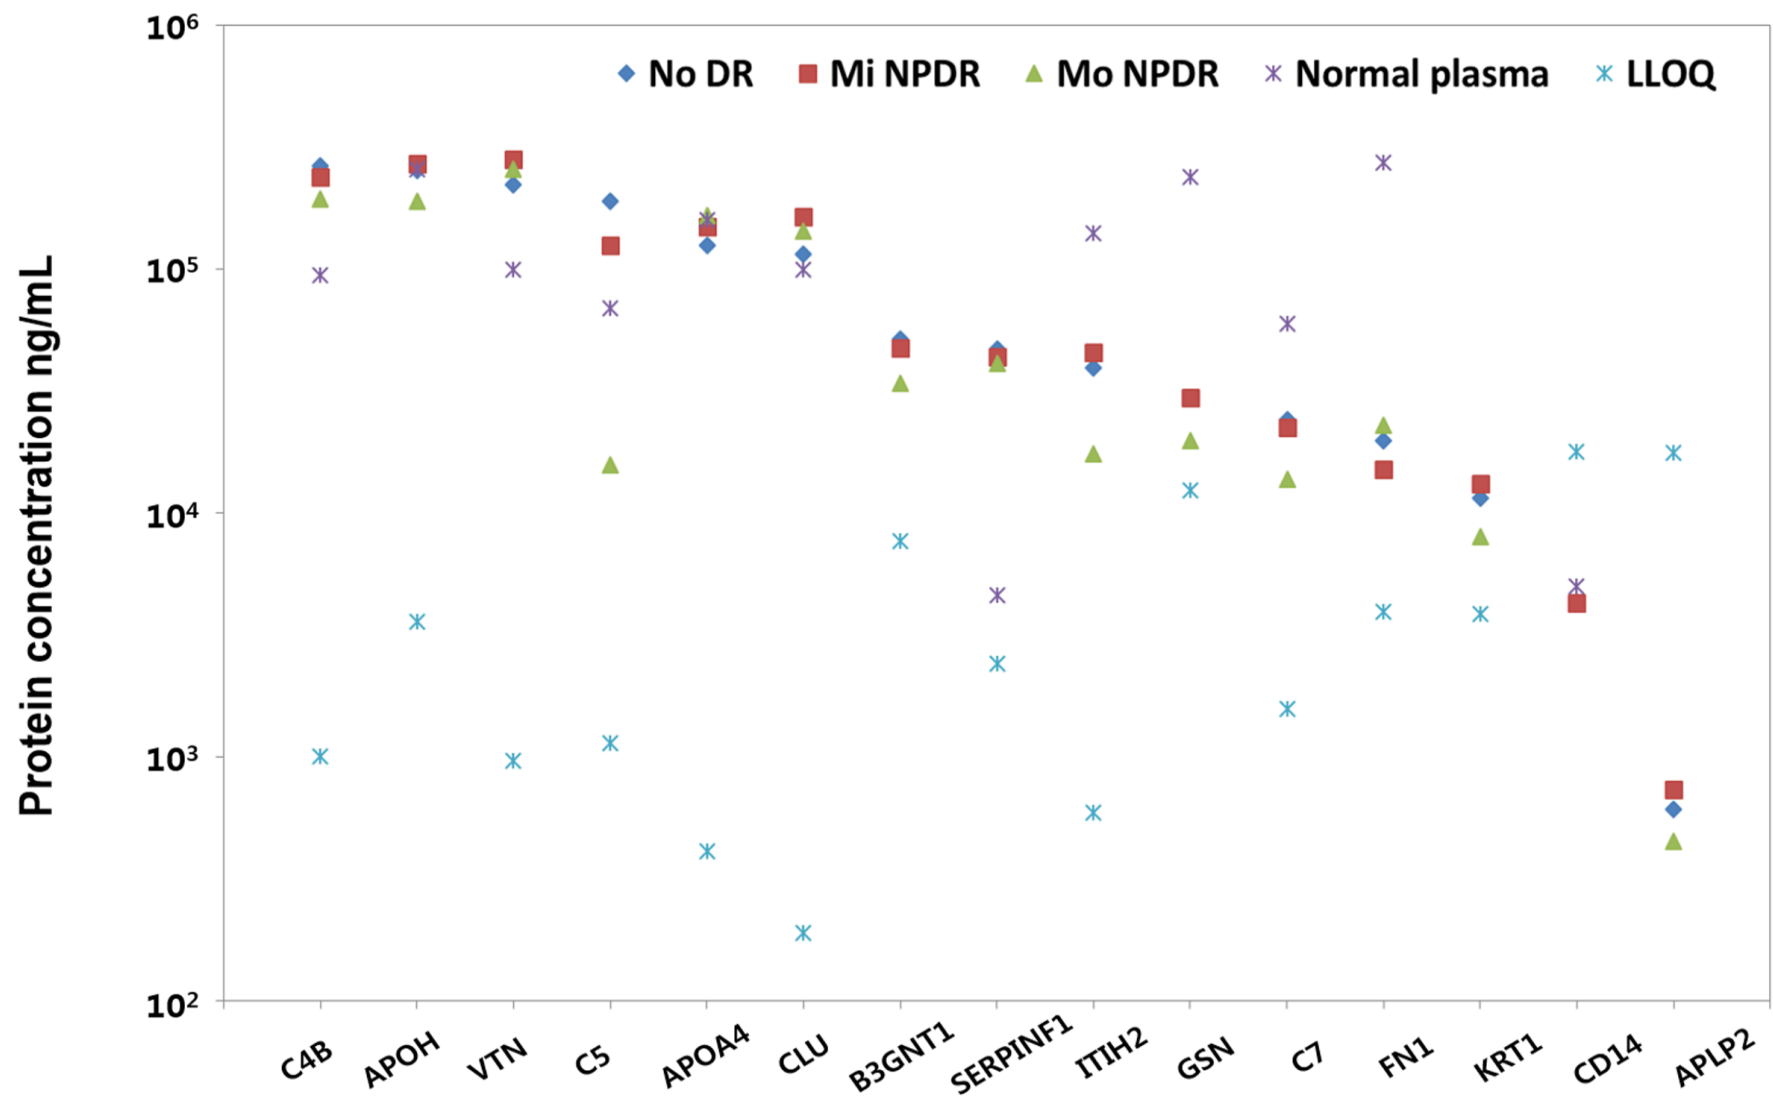

Supplement: f1 [file 6571976.f1.zip]
