# Supplementary material for: Development of Diagnostic Biomarkers for Detecting Diabetic Retinopathy at Early Stages Using Quantitative Proteomics
Source: Hindawi journal article supplement (doi:10.1155/2016/6571976), 2015-11-09
Supplement: f1 [file 6571976.f1.zip]

## Supplementary Table 6. Selection of reliable transitions for MRM analysis

- a) Uniprot human database (Uniprot Human.2013.12 fasta)  
b) Ion charge state and character  
c) Precursor ion m/z  
d) Product ion m/z  
e) declustering potential parameter value  
f) collision energy parameter value  
g) MASCOT search Identification from LC-MRM/MS (IDA mode)

| N  | Gene name | Accession<br>Number <sup>a)</sup> | Peptide Sequence  | Ion <sup>b)</sup> | Q1 <sup>c)</sup> | Q3 <sup>d)</sup> | DP <sup>e)</sup> |
|----|-----------|-----------------------------------|-------------------|-------------------|------------------|------------------|------------------|
| 1  | AZGP1     | P25311                            | YSLTYIYTGLSK      | +2y9              | 704.87           | 1045.56          | 82.5             |
| 2  | AZGP1     | P25311                            | YSLTYIYTGLSK      | +2y8              | 704.87           | 944.51           | 82.5             |
| 3  | AZGP1     | P25311                            | YSLTYIYTGLSK      | +2y7              | 704.87           | 781.45           | 82.5             |
| 4  | AZGP1     | P25311                            | YSLTYIYTGLSK      | +2y6              | 704.87           | 668.36           | 82.5             |
| 5  | AZGP1     | P25311                            | YSLTYIYTGLSK      | +2y5              | 704.87           | 505.30           | 82.5             |
| 6  | AZGP1     | P25311                            | DYIEFNK           | +2y5              | 464.72           | 650.35           | 65               |
| 7  | AZGP1     | P25311                            | DYIEFNK           | +2y4              | 464.72           | 537.27           | 65               |
| 8  | AZGP1     | P25311                            | DYIEFNK           | +2y3              | 464.72           | 408.22           | 65               |
| 9  | AZGP1     | P25311                            | EIPAWVPFDPAQAQITK | +2y11             | 891.97           | 1186.65          | 96.1             |
| 10 | AZGP1     | P25311                            | EIPAWVPFDPAQAQITK | +2y10             | 891.97           | 1087.58          | 96.1             |
| 11 | AZGP1     | P25311                            | EIPAWVPFDPAQAQITK | +2y7              | 891.97           | 728.43           | 96.1             |
| 12 | AZGP1     | P25311                            | EIPAWVPFDPAQAQITK | +2y5              | 891.97           | 560.34           | 96.1             |
| 13 | AZGP1     | P25311                            | EIPAWVPFDPAQAQITK | +2y4              | 891.97           | 489.30           | 96.1             |
| 14 | AZGP1     | P25311                            | WEAEPVYVQR        | +2y9              | 638.82           | 1090.55          | 77.7             |
| 15 | AZGP1     | P25311                            | WEAEPVYVQR        | +2y8              | 638.82           | 961.51           | 77.7             |
| 16 | AZGP1     | P25311                            | WEAEPVYVQR        | +2y7              | 638.82           | 890.47           | 77.7             |
| 17 | AZGP1     | P25311                            | WEAEPVYVQR        | +2y6              | 638.82           | 761.43           | 77.7             |
| 18 | AZGP1     | P25311                            | WEAEPVYVQR        | +2y4              | 638.82           | 565.31           | 77.7             |
| 19 | AZGP1     | P25311                            | AGEVQEPELR        | +2y8              | 564.29           | 999.51           | 72.3             |
| 20 | AZGP1     | P25311                            | AGEVQEPELR        | +2y7              | 564.29           | 870.47           | 72.3             |
| 21 | AZGP1     | P25311                            | AGEVQEPELR        | +2y6              | 564.29           | 771.40           | 72.3             |
| 22 | AZGP1     | P25311                            | AGEVQEPELR        | +2y5              | 564.29           | 643.34           | 72.3             |
| 23 | AZGP1     | P25311                            | AGEVQEPELR        | +2y4              | 564.29           | 514.30           | 72.3             |
| 24 | APOA1     | P02647                            | LLDNWDSVTSTFSK    | +2y10             | 806.90           | 1157.55          | 89.9             |
| 25 | APOA1     | P02647                            | LLDNWDSVTSTFSK    | +2y9              | 806.90           | 971.47           | 89.9             |
| 26 | APOA1     | P02647                            | LLDNWDSVTSTFSK    | +2y8              | 806.90           | 856.44           | 89.9             |
| 27 | APOA1     | P02647                            | LLDNWDSVTSTFSK    | +2y6              | 806.90           | 670.34           | 89.9             |
| 28 | APOA1     | P02647                            | LLDNWDSVTSTFSK    | +2y5              | 806.90           | 569.29           | 89.9             |
| 29 | APOA1     | P02647                            | EQLGPVTQEFWDNLEK  | +2y10             | 966.97           | 1309.61          | 101.6            |
| 30 | APOA1     | P02647                            | EQLGPVTQEFWDNLEK  | +2y7              | 966.97           | 951.46           | 101.6            |
| 31 | APOA1     | P02647                            | EQLGPVTQEFWDNLEK  | +2y6              | 966.97           | 804.39           | 101.6            |
| 32 | APOA1     | P02647                            | EQLGPVTQEFWDNLEK  | +2y5              | 966.97           | 618.31           | 101.6            |
| 33 | APOA1     | P02647                            | EQLGPVTQEFWDNLEK  | +2y4              | 966.97           | 503.28           | 101.6            |
| 34 | APOA1     | P02647                            | VQPYLDDFQK        | +2y8              | 626.81           | 1025.49          | 76.8             |
| 35 | APOA1     | P02647                            | VQPYLDDFQK        | +2y7              | 626.81           | 928.44           | 76.8             |
| 36 | APOA1     | P02647                            | VQPYLDDFQK        | +2y6              | 626.81           | 765.38           | 76.8             |
| 37 | APOA1     | P02647                            | VQPYLDDFQK        | +2y5              | 626.81           | 652.29           | 76.8             |

|    |       |        |                    |       |        |         |       |
|----|-------|--------|--------------------|-------|--------|---------|-------|
| 38 | APOA1 | P02647 | VQPYLDDFQK         | +2y4  | 626.81 | 537.27  | 76.8  |
| 39 | APOA1 | P02647 | AELQEGAR           | +2y7  | 437.22 | 802.41  | 63    |
| 40 | APOA1 | P02647 | AELQEGAR           | +2y6  | 437.22 | 673.36  | 63    |
| 41 | APOA1 | P02647 | AELQEGAR           | +2y5  | 437.22 | 560.28  | 63    |
| 42 | APOA1 | P02647 | AELQEGAR           | +2y4  | 437.22 | 432.22  | 63    |
| 43 | APOA1 | P02647 | AELQEGAR           | +2y3  | 437.22 | 303.18  | 63    |
| 44 | APOA1 | P02647 | VSFLSALEEYTK       | +2y9  | 693.86 | 1053.55 | 81.7  |
| 45 | APOA1 | P02647 | VSFLSALEEYTK       | +2y8  | 693.86 | 940.46  | 81.7  |
| 46 | APOA1 | P02647 | VSFLSALEEYTK       | +2y7  | 693.86 | 853.43  | 81.7  |
| 47 | APOA1 | P02647 | VSFLSALEEYTK       | +2y6  | 693.86 | 782.39  | 81.7  |
| 48 | APOA1 | P02647 | VSFLSALEEYTK       | +2y4  | 693.86 | 540.27  | 81.7  |
| 49 | CTSD  | P07339 | YSQAVPAVTEGPIPEVLK | +2y13 | 949.52 | 1349.77 | 100.3 |
| 50 | CTSD  | P07339 | YSQAVPAVTEGPIPEVLK | +2y10 | 949.52 | 1082.61 | 100.3 |
| 51 | CTSD  | P07339 | YSQAVPAVTEGPIPEVLK | +2y8  | 949.52 | 852.52  | 100.3 |
| 52 | CTSD  | P07339 | YSQAVPAVTEGPIPEVLK | +2y7  | 949.52 | 795.50  | 100.3 |
| 53 | CTSD  | P07339 | YSQAVPAVTEGPIPEVLK | +2y5  | 949.52 | 585.36  | 100.3 |
| 54 | CTSD  | P07339 | QVFGAATK           | +2y7  | 440.23 | 751.40  | 63.2  |
| 55 | CTSD  | P07339 | QVFGAATK           | +2y6  | 440.23 | 652.33  | 63.2  |
| 56 | CTSD  | P07339 | QVFGAATK           | +2y5  | 440.23 | 505.26  | 63.2  |
| 57 | CTSD  | P07339 | QVFGAATK           | +2y4  | 440.23 | 448.24  | 63.2  |
| 58 | CTSD  | P07339 | QVFGAATK           | +2y3  | 440.23 | 319.20  | 63.2  |
| 59 | CTSD  | P07339 | QPGITFIAAK         | +2y8  | 523.31 | 820.49  | 69.3  |
| 60 | CTSD  | P07339 | QPGITFIAAK         | +2y7  | 523.31 | 763.47  | 69.3  |
| 61 | CTSD  | P07339 | QPGITFIAAK         | +2y6  | 523.31 | 650.39  | 69.3  |
| 62 | CTSD  | P07339 | QPGITFIAAK         | +2y5  | 523.31 | 549.34  | 69.3  |
| 63 | CTSD  | P07339 | QPGITFIAAK         | +2y4  | 523.31 | 402.27  | 69.3  |
| 64 | CTSD  | P07339 | GSLSYLVNTR         | +2y7  | 555.30 | 852.46  | 71.6  |
| 65 | CTSD  | P07339 | GSLSYLVNTR         | +2y6  | 555.30 | 765.43  | 71.6  |
| 66 | CTSD  | P07339 | GSLSYLVNTR         | +2y5  | 555.30 | 602.36  | 71.6  |
| 67 | CTSD  | P07339 | GSLSYLVNTR         | +2y4  | 555.30 | 489.28  | 71.6  |
| 68 | CTSD  | P07339 | GSLSYLVNTR         | +2y3  | 555.30 | 375.24  | 71.6  |
| 69 | CTSD  | P07339 | VGFAEAAR           | +2y7  | 410.72 | 721.36  | 61.1  |
| 70 | CTSD  | P07339 | VGFAEAAR           | +2y6  | 410.72 | 664.34  | 61.1  |
| 71 | CTSD  | P07339 | VGFAEAAR           | +2y5  | 410.72 | 517.27  | 61.1  |
| 72 | CTSD  | P07339 | VGFAEAAR           | +2y4  | 410.72 | 446.24  | 61.1  |
| 73 | CTSD  | P07339 | VGFAEAAR           | +2y3  | 410.72 | 317.19  | 61.1  |
| 74 | A1BG  | P04217 | SGLSTGWTQLSK       | +2y9  | 632.83 | 1007.52 | 77.3  |
| 75 | A1BG  | P04217 | SGLSTGWTQLSK       | +2y8  | 632.83 | 920.48  | 77.3  |
| 76 | A1BG  | P04217 | SGLSTGWTQLSK       | +2y7  | 632.83 | 819.44  | 77.3  |
| 77 | A1BG  | P04217 | SGLSTGWTQLSK       | +2y6  | 632.83 | 762.41  | 77.3  |
| 78 | A1BG  | P04217 | SGLSTGWTQLSK       | +2y5  | 632.83 | 576.34  | 77.3  |
| 79 | A1BG  | P04217 | LLELTGPK           | +2y7  | 435.77 | 757.45  | 62.9  |
| 80 | A1BG  | P04217 | LLELTGPK           | +2y6  | 435.77 | 644.36  | 62.9  |
| 81 | A1BG  | P04217 | LLELTGPK           | +2y5  | 435.77 | 515.32  | 62.9  |
| 82 | A1BG  | P04217 | LLELTGPK           | +2y4  | 435.77 | 402.23  | 62.9  |
| 83 | A1BG  | P04217 | LLELTGPK           | +2y3  | 435.77 | 301.19  | 62.9  |
| 84 | A1BG  | P04217 | GVTFLLR            | +2y5  | 403.25 | 649.40  | 60.5  |
| 85 | A1BG  | P04217 | GVTFLLR            | +2y4  | 403.25 | 548.36  | 60.5  |
| 86 | A1BG  | P04217 | GVTFLLR            | +2y3  | 403.25 | 401.29  | 60.5  |
| 87 | A1BG  | P04217 | ATWSGAVLAGR        | +2y9  | 544.80 | 916.50  | 70.8  |

|     |          |        |                  |       |        |         |      |
|-----|----------|--------|------------------|-------|--------|---------|------|
| 88  | A1BG     | P04217 | ATWSGAVLAGR      | +2y8  | 544.80 | 730.42  | 70.8 |
| 89  | A1BG     | P04217 | ATWSGAVLAGR      | +2y7  | 544.80 | 643.39  | 70.8 |
| 90  | A1BG     | P04217 | ATWSGAVLAGR      | +2y6  | 544.80 | 586.37  | 70.8 |
| 91  | A1BG     | P04217 | ATWSGAVLAGR      | +2y4  | 544.80 | 416.26  | 70.8 |
| 92  | APOH     | P02749 | ATVVYQGER        | +2y7  | 511.77 | 850.44  | 68.4 |
| 93  | APOH     | P02749 | ATVVYQGER        | +2y6  | 511.77 | 751.37  | 68.4 |
| 94  | APOH     | P02749 | ATVVYQGER        | +2y5  | 511.77 | 652.30  | 68.4 |
| 95  | APOH     | P02749 | ATVVYQGER        | +2y4  | 511.77 | 489.24  | 68.4 |
| 96  | APOH     | P02749 | ATVVYQGER        | +2y3  | 511.77 | 361.18  | 68.4 |
| 97  | SERPINF1 | P36955 | LAAAVSNFGYDLYR   | +2y10 | 780.40 | 1233.59 | 88   |
| 98  | SERPINF1 | P36955 | LAAAVSNFGYDLYR   | +2y9  | 780.40 | 1134.52 | 88   |
| 99  | SERPINF1 | P36955 | LAAAVSNFGYDLYR   | +2y8  | 780.40 | 1047.49 | 88   |
| 100 | SERPINF1 | P36955 | LAAAVSNFGYDLYR   | +2y6  | 780.40 | 786.38  | 88   |
| 101 | SERPINF1 | P36955 | LAAAVSNFGYDLYR   | +2y3  | 780.40 | 451.27  | 88   |
| 102 | SERPINF1 | P36955 | ELLDVTAPQK       | +2y9  | 607.83 | 972.54  | 75.4 |
| 103 | SERPINF1 | P36955 | ELLDVTAPQK       | +2y8  | 607.83 | 859.45  | 75.4 |
| 104 | SERPINF1 | P36955 | ELLDVTAPQK       | +2y7  | 607.83 | 744.43  | 75.4 |
| 105 | SERPINF1 | P36955 | ELLDVTAPQK       | +2y5  | 607.83 | 544.31  | 75.4 |
| 106 | SERPINF1 | P36955 | ELLDVTAPQK       | +2y3  | 607.83 | 372.22  | 75.4 |
| 107 | SERPINF1 | P36955 | SSFVAPLEK        | +2y7  | 489.27 | 803.47  | 66.8 |
| 108 | SERPINF1 | P36955 | SSFVAPLEK        | +2y6  | 489.27 | 656.40  | 66.8 |
| 109 | SERPINF1 | P36955 | SSFVAPLEK        | +2y5  | 489.27 | 557.33  | 66.8 |
| 110 | SERPINF1 | P36955 | SSFVAPLEK        | +2y4  | 489.27 | 486.29  | 66.8 |
| 111 | SERPINF1 | P36955 | SSFVAPLEK        | +2y3  | 489.27 | 389.24  | 66.8 |
| 112 | SERPINF1 | P36955 | LSYEGEVTK        | +2y8  | 513.26 | 912.43  | 68.5 |
| 113 | SERPINF1 | P36955 | LSYEGEVTK        | +2y7  | 513.26 | 825.40  | 68.5 |
| 114 | SERPINF1 | P36955 | LSYEGEVTK        | +2y6  | 513.26 | 662.34  | 68.5 |
| 115 | SERPINF1 | P36955 | LSYEGEVTK        | +2y5  | 513.26 | 533.29  | 68.5 |
| 116 | SERPINF1 | P36955 | LSYEGEVTK        | +2y3  | 513.26 | 347.23  | 68.5 |
| 117 | SERPINF1 | P36955 | DTDTGALLFIGK     | +2y10 | 625.83 | 1034.59 | 76.7 |
| 118 | SERPINF1 | P36955 | DTDTGALLFIGK     | +2y8  | 625.83 | 818.51  | 76.7 |
| 119 | SERPINF1 | P36955 | DTDTGALLFIGK     | +2y6  | 625.83 | 690.45  | 76.7 |
| 120 | SERPINF1 | P36955 | DTDTGALLFIGK     | +2y4  | 625.83 | 464.29  | 76.7 |
| 121 | SERPINF1 | P36955 | DTDTGALLFIGK     | +2y3  | 625.83 | 317.22  | 76.7 |
| 122 | A2M      | P01023 | NEDSLVQVQTDK     | +2y7  | 697.84 | 836.45  | 82   |
| 123 | A2M      | P01023 | NEDSLVQVQTDK     | +2y6  | 697.84 | 737.38  | 82   |
| 124 | A2M      | P01023 | NEDSLVQVQTDK     | +2y5  | 697.84 | 590.31  | 82   |
| 125 | A2M      | P01023 | NEDSLVQVQTDK     | +2y4  | 697.84 | 491.25  | 82   |
| 126 | A2M      | P01023 | NEDSLVQVQTDK     | +2y3  | 697.84 | 363.19  | 82   |
| 127 | A2M      | P01023 | IAQWQSFQLEGGLK   | +2y9  | 802.93 | 978.53  | 89.7 |
| 128 | A2M      | P01023 | IAQWQSFQLEGGLK   | +2y7  | 802.93 | 744.43  | 89.7 |
| 129 | A2M      | P01023 | IAQWQSFQLEGGLK   | +2y6  | 802.93 | 616.37  | 89.7 |
| 130 | A2M      | P01023 | IAQWQSFQLEGGLK   | +2y5  | 802.93 | 503.28  | 89.7 |
| 131 | A2M      | P01023 | IAQWQSFQLEGGLK   | +2y4  | 802.93 | 374.24  | 89.7 |
| 132 | A2M      | P01023 | QFSFPLSSEPFQGSYK | +2y12 | 924.94 | 1339.65 | 98.5 |
| 133 | A2M      | P01023 | QFSFPLSSEPFQGSYK | +2y10 | 924.94 | 1129.52 | 98.5 |
| 134 | A2M      | P01023 | QFSFPLSSEPFQGSYK | +2y9  | 924.94 | 1042.48 | 98.5 |
| 135 | A2M      | P01023 | QFSFPLSSEPFQGSYK | +2y7  | 924.94 | 826.41  | 98.5 |
| 136 | A2M      | P01023 | QFSFPLSSEPFQGSYK | +2y4  | 924.94 | 454.23  | 98.5 |
| 137 | A2M      | P01023 | ALLAYAFALAGNQDK  | +2y10 | 783.42 | 1034.53 | 88.2 |

|     |          |        |                      |       |         |         |       |
|-----|----------|--------|----------------------|-------|---------|---------|-------|
| 138 | A2M      | P01023 | ALLAYAFALAGNQDK      | +2y9  | 783.42  | 963.49  | 88.2  |
| 139 | A2M      | P01023 | ALLAYAFALAGNQDK      | +2y8  | 783.42  | 816.42  | 88.2  |
| 140 | A2M      | P01023 | ALLAYAFALAGNQDK      | +2y6  | 783.42  | 632.30  | 88.2  |
| 141 | A2M      | P01023 | ALLAYAFALAGNQDK      | +2y5  | 783.42  | 561.26  | 88.2  |
| 142 | A2M      | P01023 | VSNQTLSLFFTVLQDVPVR  | +2y11 | 1082.09 | 1320.73 | 110   |
| 143 | A2M      | P01023 | VSNQTLSLFFTVLQDVPVR  | +2y10 | 1082.09 | 1173.66 | 110   |
| 144 | A2M      | P01023 | VSNQTLSLFFTVLQDVPVR  | +2y7  | 1082.09 | 826.48  | 110   |
| 145 | A2M      | P01023 | VSNQTLSLFFTVLQDVPVR  | +2y6  | 1082.09 | 713.39  | 110   |
| 146 | A2M      | P01023 | VSNQTLSLFFTVLQDVPVR  | +2y3  | 1082.09 | 371.24  | 110   |
| 147 | SERPINA3 | P01011 | EQLSLLDR             | +2y6  | 487.27  | 716.43  | 66.6  |
| 148 | SERPINA3 | P01011 | EQLSLLDR             | +2y5  | 487.27  | 603.35  | 66.6  |
| 149 | SERPINA3 | P01011 | EQLSLLDR             | +2y4  | 487.27  | 516.31  | 66.6  |
| 150 | SERPINA3 | P01011 | EQLSLLDR             | +2y3  | 487.27  | 403.23  | 66.6  |
| 151 | SERPINA3 | P01011 | EIGELYLPK            | +2y7  | 531.30  | 819.46  | 69.8  |
| 152 | SERPINA3 | P01011 | EIGELYLPK            | +2y6  | 531.30  | 762.44  | 69.8  |
| 153 | SERPINA3 | P01011 | EIGELYLPK            | +2y5  | 531.30  | 633.40  | 69.8  |
| 154 | SERPINA3 | P01011 | EIGELYLPK            | +2y4  | 531.30  | 520.31  | 69.8  |
| 155 | SERPINA3 | P01011 | EIGELYLPK            | +2y3  | 531.30  | 357.25  | 69.8  |
| 156 | SERPINA3 | P01011 | DYNLNDILLQLGIEEAFTSK | +2y10 | 1148.59 | 1094.57 | 114.8 |
| 157 | SERPINA3 | P01011 | DYNLNDILLQLGIEEAFTSK | +2y9  | 1148.59 | 981.49  | 114.8 |
| 158 | SERPINA3 | P01011 | DYNLNDILLQLGIEEAFTSK | +2y5  | 1148.59 | 553.30  | 114.8 |
| 159 | SERPINA3 | P01011 | DYNLNDILLQLGIEEAFTSK | +2y4  | 1148.59 | 482.26  | 114.8 |
| 160 | SERPINA3 | P01011 | DYNLNDILLQLGIEEAFTSK | +2y3  | 1148.59 | 335.19  | 114.8 |
| 161 | SERPINA3 | P01011 | AVLDVFEEGTEASAATAVK  | +2y12 | 954.48  | 1134.56 | 100.7 |
| 162 | SERPINA3 | P01011 | AVLDVFEEGTEASAATAVK  | +2y11 | 954.48  | 1005.52 | 100.7 |
| 163 | SERPINA3 | P01011 | AVLDVFEEGTEASAATAVK  | +2y6  | 954.48  | 560.34  | 100.7 |
| 164 | SERPINA3 | P01011 | AVLDVFEEGTEASAATAVK  | +2y5  | 954.48  | 489.30  | 100.7 |
| 165 | SERPINA3 | P01011 | AVLDVFEEGTEASAATAVK  | +2y4  | 954.48  | 418.27  | 100.7 |
| 166 | SERPINA3 | P01011 | ITLLSALVETR          | +2y8  | 608.37  | 888.51  | 75.5  |
| 167 | SERPINA3 | P01011 | ITLLSALVETR          | +2y7  | 608.37  | 775.43  | 75.5  |
| 168 | SERPINA3 | P01011 | ITLLSALVETR          | +2y6  | 608.37  | 688.40  | 75.5  |
| 169 | SERPINA3 | P01011 | ITLLSALVETR          | +2y5  | 608.37  | 617.36  | 75.5  |
| 170 | SERPINA3 | P01011 | ITLLSALVETR          | +2y4  | 608.37  | 504.28  | 75.5  |
| 171 | APOA4    | P06727 | SELTQQLNALFQDK       | +2y8  | 817.92  | 948.51  | 90.7  |
| 172 | APOA4    | P06727 | SELTQQLNALFQDK       | +2y7  | 817.92  | 835.43  | 90.7  |
| 173 | APOA4    | P06727 | SELTQQLNALFQDK       | +2y5  | 817.92  | 650.35  | 90.7  |
| 174 | APOA4    | P06727 | SELTQQLNALFQDK       | +2y4  | 817.92  | 537.27  | 90.7  |
| 175 | APOA4    | P06727 | SELTQQLNALFQDK       | +2y3  | 817.92  | 390.20  | 90.7  |
| 176 | APOA4    | P06727 | LGEVNTYAGDLQK        | +2y9  | 704.36  | 1009.49 | 82.5  |
| 177 | APOA4    | P06727 | LGEVNTYAGDLQK        | +2y8  | 704.36  | 895.45  | 82.5  |
| 178 | APOA4    | P06727 | LGEVNTYAGDLQK        | +2y7  | 704.36  | 794.40  | 82.5  |
| 179 | APOA4    | P06727 | LGEVNTYAGDLQK        | +2y6  | 704.36  | 631.34  | 82.5  |
| 180 | APOA4    | P06727 | LGEVNTYAGDLQK        | +2y5  | 704.36  | 560.30  | 82.5  |
| 181 | APOA4    | P06727 | TQVNTQAEQLR          | +2y9  | 644.34  | 1058.56 | 78.1  |
| 182 | APOA4    | P06727 | TQVNTQAEQLR          | +2y8  | 644.34  | 959.49  | 78.1  |
| 183 | APOA4    | P06727 | TQVNTQAEQLR          | +2y7  | 644.34  | 845.45  | 78.1  |
| 184 | APOA4    | P06727 | TQVNTQAEQLR          | +2y6  | 644.34  | 744.40  | 78.1  |
| 185 | APOA4    | P06727 | TQVNTQAEQLR          | +2y5  | 644.34  | 616.34  | 78.1  |
| 186 | APOA4    | P06727 | IDQNVEELK            | +2y8  | 544.29  | 974.48  | 70.8  |
| 187 | APOA4    | P06727 | IDQNVEELK            | +2y7  | 544.29  | 859.45  | 70.8  |

|     |       |        |                    |       |         |         |       |
|-----|-------|--------|--------------------|-------|---------|---------|-------|
| 188 | APOA4 | P06727 | IDQNVEELK          | +2y6  | 544.29  | 731.39  | 70.8  |
| 189 | APOA4 | P06727 | IDQNVEELK          | +2y4  | 544.29  | 518.28  | 70.8  |
| 190 | APOA4 | P06727 | IDQNVEELK          | +2y3  | 544.29  | 389.24  | 70.8  |
| 191 | APOA4 | P06727 | LAPLAEDVR          | +2y7  | 492.28  | 799.43  | 67    |
| 192 | APOA4 | P06727 | LAPLAEDVR          | +2y6  | 492.28  | 702.38  | 67    |
| 193 | APOA4 | P06727 | LAPLAEDVR          | +2y5  | 492.28  | 589.29  | 67    |
| 194 | APOA4 | P06727 | LAPLAEDVR          | +2y4  | 492.28  | 518.26  | 67    |
| 195 | APOA4 | P06727 | LAPLAEDVR          | +2y3  | 492.28  | 389.21  | 67    |
| 196 | C3    | P01024 | VVLVSLQSGYLFIQTDK  | +2y10 | 955.54  | 1171.60 | 100.8 |
| 197 | C3    | P01024 | VVLVSLQSGYLFIQTDK  | +2y9  | 955.54  | 1084.57 | 100.8 |
| 198 | C3    | P01024 | VVLVSLQSGYLFIQTDK  | +2y7  | 955.54  | 864.48  | 100.8 |
| 199 | C3    | P01024 | VVLVSLQSGYLFIQTDK  | +2y6  | 955.54  | 751.40  | 100.8 |
| 200 | C3    | P01024 | VVLVSLQSGYLFIQTDK  | +2y5  | 955.54  | 604.33  | 100.8 |
| 201 | C3    | P01024 | AYYENSPQQVFSTEFVK  | +2y8  | 1083.50 | 986.48  | 110.1 |
| 202 | C3    | P01024 | AYYENSPQQVFSTEFVK  | +2y7  | 1083.50 | 839.41  | 110.1 |
| 203 | C3    | P01024 | AYYENSPQQVFSTEFVK  | +2y6  | 1083.50 | 752.38  | 110.1 |
| 204 | C3    | P01024 | AYYENSPQQVFSTEFVK  | +2y4  | 1083.50 | 522.29  | 110.1 |
| 205 | C3    | P01024 | AYYENSPQQVFSTEFVK  | +2y3  | 1083.50 | 375.22  | 110.1 |
| 206 | C3    | P01024 | TGLQEVEVK          | +2y8  | 501.78  | 901.50  | 67.7  |
| 207 | C3    | P01024 | TGLQEVEVK          | +2y6  | 501.78  | 731.39  | 67.7  |
| 208 | C3    | P01024 | TGLQEVEVK          | +2y5  | 501.78  | 603.33  | 67.7  |
| 209 | C3    | P01024 | TGLQEVEVK          | +2y4  | 501.78  | 474.29  | 67.7  |
| 210 | C3    | P01024 | TGLQEVEVK          | +2y3  | 501.78  | 375.22  | 67.7  |
| 211 | C3    | P01024 | APSTWLTAYVVK       | +2y10 | 668.37  | 1167.64 | 79.8  |
| 212 | C3    | P01024 | APSTWLTAYVVK       | +2y9  | 668.37  | 1080.61 | 79.8  |
| 213 | C3    | P01024 | APSTWLTAYVVK       | +2y8  | 668.37  | 979.56  | 79.8  |
| 214 | C3    | P01024 | APSTWLTAYVVK       | +2y7  | 668.37  | 793.48  | 79.8  |
| 215 | C3    | P01024 | APSTWLTAYVVK       | +2y6  | 668.37  | 680.40  | 79.8  |
| 216 | C3    | P01024 | QLYNVEATSYALLALLQK | +2y12 | 1076.11 | 1333.81 | 109.6 |
| 217 | C3    | P01024 | QLYNVEATSYALLALLQK | +2y11 | 1076.11 | 1232.76 | 109.6 |
| 218 | C3    | P01024 | QLYNVEATSYALLALLQK | +2y10 | 1076.11 | 1145.73 | 109.6 |
| 219 | C3    | P01024 | QLYNVEATSYALLALLQK | +2y9  | 1076.11 | 982.67  | 109.6 |
| 220 | C3    | P01024 | QLYNVEATSYALLALLQK | +2y6  | 1076.11 | 685.46  | 109.6 |
| 221 | FGG   | P02679 | YLQEIYNSNNQK       | +2y9  | 757.37  | 1109.52 | 86.3  |
| 222 | FGG   | P02679 | YLQEIYNSNNQK       | +2y7  | 757.37  | 867.40  | 86.3  |
| 223 | FGG   | P02679 | YLQEIYNSNNQK       | +2y6  | 757.37  | 704.33  | 86.3  |
| 224 | FGG   | P02679 | YLQEIYNSNNQK       | +2y5  | 757.37  | 590.29  | 86.3  |
| 225 | FGG   | P02679 | YLQEIYNSNNQK       | +2y4  | 757.37  | 503.26  | 86.3  |
| 226 | FGG   | P02679 | QSGLYFIKPLK        | +2y7  | 647.38  | 908.56  | 78.3  |
| 227 | FGG   | P02679 | QSGLYFIKPLK        | +2y6  | 647.38  | 745.50  | 78.3  |
| 228 | FGG   | P02679 | QSGLYFIKPLK        | +2y5  | 647.38  | 598.43  | 78.3  |
| 229 | FGG   | P02679 | QSGLYFIKPLK        | +2y4  | 647.38  | 485.34  | 78.3  |
| 230 | FGG   | P02679 | QSGLYFIKPLK        | +2y3  | 647.38  | 357.25  | 78.3  |
| 231 | FGG   | P02679 | LDGSVDFK           | +2y7  | 440.72  | 767.36  | 63.2  |
| 232 | FGG   | P02679 | LDGSVDFK           | +2y6  | 440.72  | 652.33  | 63.2  |
| 233 | FGG   | P02679 | LDGSVDFK           | +2y5  | 440.72  | 595.31  | 63.2  |
| 234 | FGG   | P02679 | LDGSVDFK           | +2y4  | 440.72  | 508.28  | 63.2  |
| 235 | FGG   | P02679 | LDGSVDFK           | +2y3  | 440.72  | 409.21  | 63.2  |
| 236 | FGG   | P02679 | VELEDWNGR          | +2y7  | 559.27  | 889.42  | 71.9  |
| 237 | FGG   | P02679 | VELEDWNGR          | +2y6  | 559.27  | 776.33  | 71.9  |

|     |     |        |                   |       |        |         |       |
|-----|-----|--------|-------------------|-------|--------|---------|-------|
| 238 | FGG | P02679 | VELEDWNGR         | +2y5  | 559.27 | 647.29  | 71.9  |
| 239 | FGG | P02679 | VELEDWNGR         | +2y4  | 559.27 | 532.26  | 71.9  |
| 240 | FGG | P02679 | VELEDWNGR         | +2y3  | 559.27 | 346.18  | 71.9  |
| 241 | FGG | P02679 | ASTPNGYDNGIIWATWK | +2y6  | 947.46 | 804.44  | 100.2 |
| 242 | FGG | P02679 | ASTPNGYDNGIIWATWK | +2y5  | 947.46 | 691.36  | 100.2 |
| 243 | FGG | P02679 | ASTPNGYDNGIIWATWK | +2y4  | 947.46 | 505.28  | 100.2 |
| 244 | FGG | P02679 | ASTPNGYDNGIIWATWK | +2y3  | 947.46 | 434.24  | 100.2 |
| 245 | FGG | P02679 | ASTPNGYDNGIIWATWK | +2y2  | 947.46 | 333.19  | 100.2 |
| 246 | HPX | P02790 | NFPSPVDAAFR       | +2y9  | 610.81 | 959.49  | 75.6  |
| 247 | HPX | P02790 | NFPSPVDAAFR       | +2y8  | 610.81 | 862.44  | 75.6  |
| 248 | HPX | P02790 | NFPSPVDAAFR       | +2y7  | 610.81 | 775.41  | 75.6  |
| 249 | HPX | P02790 | NFPSPVDAAFR       | +2y5  | 610.81 | 579.29  | 75.6  |
| 250 | HPX | P02790 | NFPSPVDAAFR       | +2y4  | 610.81 | 464.26  | 75.6  |
| 251 | HPX | P02790 | VWVYPPEK          | +2y7  | 509.27 | 918.47  | 68.2  |
| 252 | HPX | P02790 | VWVYPPEK          | +2y6  | 509.27 | 732.39  | 68.2  |
| 253 | HPX | P02790 | VWVYPPEK          | +2y5  | 509.27 | 633.32  | 68.2  |
| 254 | HPX | P02790 | VWVYPPEK          | +2y4  | 509.27 | 470.26  | 68.2  |
| 255 | HPX | P02790 | VWVYPPEK          | +2y3  | 509.27 | 373.21  | 68.2  |
| 256 | HPX | P02790 | LYLVQGTQVYVFLTK   | +2y12 | 886.50 | 1382.77 | 95.7  |
| 257 | HPX | P02790 | LYLVQGTQVYVFLTK   | +2y11 | 886.50 | 1283.70 | 95.7  |
| 258 | HPX | P02790 | LYLVQGTQVYVFLTK   | +2y10 | 886.50 | 1155.64 | 95.7  |
| 259 | HPX | P02790 | LYLVQGTQVYVFLTK   | +2y6  | 886.50 | 770.44  | 95.7  |
| 260 | HPX | P02790 | LYLVQGTQVYVFLTK   | +2y4  | 886.50 | 508.31  | 95.7  |
| 261 | HPX | P02790 | GGYTLVSGYPK       | +2y8  | 571.30 | 864.48  | 72.8  |
| 262 | HPX | P02790 | GGYTLVSGYPK       | +2y7  | 571.30 | 763.43  | 72.8  |
| 263 | HPX | P02790 | GGYTLVSGYPK       | +2y6  | 571.30 | 650.35  | 72.8  |
| 264 | HPX | P02790 | GGYTLVSGYPK       | +2y5  | 571.30 | 551.28  | 72.8  |
| 265 | HPX | P02790 | GGYTLVSGYPK       | +2y4  | 571.30 | 464.25  | 72.8  |
| 266 | HPX | P02790 | LWWLDLK           | +2y6  | 487.28 | 860.47  | 66.6  |
| 267 | HPX | P02790 | LWWLDLK           | +2y5  | 487.28 | 674.39  | 66.6  |
| 268 | HPX | P02790 | LWWLDLK           | +2y4  | 487.28 | 488.31  | 66.6  |
| 269 | HPX | P02790 | LWWLDLK           | +2y3  | 487.28 | 375.22  | 66.6  |
| 270 | F2  | P00734 | TATSEYQTFNPR      | +2y8  | 781.37 | 1072.52 | 88.1  |
| 271 | F2  | P00734 | TATSEYQTFNPR      | +2y6  | 781.37 | 781.40  | 88.1  |
| 272 | F2  | P00734 | TATSEYQTFNPR      | +2y5  | 781.37 | 680.35  | 88.1  |
| 273 | F2  | P00734 | TATSEYQTFNPR      | +2y4  | 781.37 | 533.28  | 88.1  |
| 274 | F2  | P00734 | TATSEYQTFNPR      | +2y3  | 781.37 | 386.21  | 88.1  |
| 275 | F2  | P00734 | ELLESYIDGR        | +2y7  | 597.80 | 839.39  | 74.7  |
| 276 | F2  | P00734 | ELLESYIDGR        | +2y6  | 597.80 | 710.35  | 74.7  |
| 277 | F2  | P00734 | ELLESYIDGR        | +2y5  | 597.80 | 623.31  | 74.7  |
| 278 | F2  | P00734 | ELLESYIDGR        | +2y4  | 597.80 | 460.25  | 74.7  |
| 279 | F2  | P00734 | ELLESYIDGR        | +2y3  | 597.80 | 347.17  | 74.7  |
| 280 | F2  | P00734 | ETAASLLQAGYK      | +2y8  | 626.33 | 879.49  | 76.8  |
| 281 | F2  | P00734 | ETAASLLQAGYK      | +2y6  | 626.33 | 679.38  | 76.8  |
| 282 | F2  | P00734 | ETAASLLQAGYK      | +2y5  | 626.33 | 566.29  | 76.8  |
| 283 | F2  | P00734 | ETAASLLQAGYK      | +2y4  | 626.33 | 438.23  | 76.8  |
| 284 | F2  | P00734 | ETAASLLQAGYK      | +2y3  | 626.33 | 367.20  | 76.8  |
| 285 | F2  | P00734 | VTGWGNLK          | +2y7  | 437.74 | 775.41  | 63    |
| 286 | F2  | P00734 | VTGWGNLK          | +2y6  | 437.74 | 674.36  | 63    |
| 287 | F2  | P00734 | VTGWGNLK          | +2y5  | 437.74 | 617.34  | 63    |

|     |       |        |                    |       |        |         |       |
|-----|-------|--------|--------------------|-------|--------|---------|-------|
| 288 | F2    | P00734 | VTGWGNLK           | +2y4  | 437.74 | 431.26  | 63    |
| 289 | F2    | P00734 | ETWTANVGK          | +2y7  | 503.25 | 775.41  | 67.8  |
| 290 | F2    | P00734 | ETWTANVGK          | +2y6  | 503.25 | 589.33  | 67.8  |
| 291 | F2    | P00734 | ETWTANVGK          | +2y5  | 503.25 | 488.28  | 67.8  |
| 292 | F2    | P00734 | ETWTANVGK          | +2y4  | 503.25 | 417.25  | 67.8  |
| 293 | F2    | P00734 | ETWTANVGK          | +2y3  | 503.25 | 303.20  | 67.8  |
| 294 | RBP3  | P10745 | DVVVLTSQTR         | +2y9  | 602.83 | 990.56  | 75.1  |
| 295 | RBP3  | P10745 | DVVVLTSQTR         | +2y7  | 602.83 | 792.42  | 75.1  |
| 296 | RBP3  | P10745 | DVVVLTSQTR         | +2y6  | 602.83 | 679.34  | 75.1  |
| 297 | RBP3  | P10745 | DVVVLTSQTR         | +2y5  | 602.83 | 578.29  | 75.1  |
| 298 | RBP3  | P10745 | DVVVLTSQTR         | +2y4  | 602.83 | 491.26  | 75.1  |
| 299 | RBP3  | P10745 | LNAGLQAASEDPR      | +2y11 | 671.34 | 1114.55 | 80.1  |
| 300 | RBP3  | P10745 | LNAGLQAASEDPR      | +2y10 | 671.34 | 1043.51 | 80.1  |
| 301 | RBP3  | P10745 | LNAGLQAASEDPR      | +2y8  | 671.34 | 873.41  | 80.1  |
| 302 | RBP3  | P10745 | LNAGLQAASEDPR      | +2y7  | 671.34 | 745.35  | 80.1  |
| 303 | RBP3  | P10745 | LNAGLQAASEDPR      | +2y5  | 671.34 | 603.27  | 80.1  |
| 304 | PTGDS | P41222 | WFSAGLASNSSWLR     | +2y12 | 791.39 | 1248.63 | 88.8  |
| 305 | PTGDS | P41222 | WFSAGLASNSSWLR     | +2y10 | 791.39 | 1090.56 | 88.8  |
| 306 | PTGDS | P41222 | WFSAGLASNSSWLR     | +2y8  | 791.39 | 920.46  | 88.8  |
| 307 | PTGDS | P41222 | WFSAGLASNSSWLR     | +2y7  | 791.39 | 849.42  | 88.8  |
| 308 | PTGDS | P41222 | WFSAGLASNSSWLR     | +2y6  | 791.39 | 762.39  | 88.8  |
| 309 | PTGDS | P41222 | SVVAPATDGGNLNSTFLR | +2y12 | 960.02 | 1293.68 | 101.1 |
| 310 | PTGDS | P41222 | SVVAPATDGGNLNSTFLR | +2y11 | 960.02 | 1178.65 | 101.1 |
| 311 | PTGDS | P41222 | SVVAPATDGGNLNSTFLR | +2y7  | 960.02 | 837.48  | 101.1 |
| 312 | PTGDS | P41222 | SVVAPATDGGNLNSTFLR | +2y6  | 960.02 | 724.40  | 101.1 |
| 313 | PTGDS | P41222 | SVVAPATDGGNLNSTFLR | +2y5  | 960.02 | 623.35  | 101.1 |
| 314 | PTGDS | P41222 | GPGEDFR            | +2y5  | 389.18 | 623.28  | 59.5  |
| 315 | PTGDS | P41222 | GPGEDFR            | +2y4  | 389.18 | 566.26  | 59.5  |
| 316 | PTGDS | P41222 | GPGEDFR            | +2y3  | 389.18 | 437.21  | 59.5  |
| 317 | PTGDS | P41222 | GPGEDFR            | +2y2  | 389.18 | 322.19  | 59.5  |
| 318 | PTGDS | P41222 | AQGFTEDTIVFLPQTDK  | +2y8  | 955.48 | 947.52  | 100.8 |
| 319 | PTGDS | P41222 | AQGFTEDTIVFLPQTDK  | +2y7  | 955.48 | 848.45  | 100.8 |
| 320 | PTGDS | P41222 | AQGFTEDTIVFLPQTDK  | +2y6  | 955.48 | 701.38  | 100.8 |
| 321 | PTGDS | P41222 | AQGFTEDTIVFLPQTDK  | +2y5  | 955.48 | 588.30  | 100.8 |
| 322 | GPX3  | P22352 | QEPGENSEILPTLK     | +2y12 | 777.90 | 1297.70 | 87.8  |
| 323 | GPX3  | P22352 | QEPGENSEILPTLK     | +2y9  | 777.90 | 1014.58 | 87.8  |
| 324 | GPX3  | P22352 | QEPGENSEILPTLK     | +2y8  | 777.90 | 900.54  | 87.8  |
| 325 | GPX3  | P22352 | QEPGENSEILPTLK     | +2y5  | 777.90 | 571.38  | 87.8  |
| 326 | GPX3  | P22352 | QEPGENSEILPTLK     | +2y4  | 777.90 | 458.30  | 87.8  |
| 327 | GPX3  | P22352 | YVRPGGGFVPNFQLFEK  | +2y8  | 978.01 | 1022.53 | 102.4 |
| 328 | GPX3  | P22352 | YVRPGGGFVPNFQLFEK  | +2y7  | 978.01 | 925.48  | 102.4 |
| 329 | GPX3  | P22352 | YVRPGGGFVPNFQLFEK  | +2y6  | 978.01 | 811.43  | 102.4 |
| 330 | GPX3  | P22352 | YVRPGGGFVPNFQLFEK  | +2y4  | 978.01 | 536.31  | 102.4 |
| 331 | GPX3  | P22352 | YVRPGGGFVPNFQLFEK  | +2y3  | 978.01 | 423.22  | 102.4 |
| 332 | ACTB  | P60709 | AVFPSIVGRPR        | +2y8  | 599.86 | 881.53  | 74.8  |
| 333 | ACTB  | P60709 | AVFPSIVGRPR        | +2y7  | 599.86 | 784.48  | 74.8  |
| 334 | ACTB  | P60709 | AVFPSIVGRPR        | +2y6  | 599.86 | 697.45  | 74.8  |
| 335 | ACTB  | P60709 | AVFPSIVGRPR        | +2y5  | 599.86 | 584.36  | 74.8  |
| 336 | ACTB  | P60709 | AVFPSIVGRPR        | +2y4  | 599.86 | 485.29  | 74.8  |
| 337 | ACTB  | P60709 | DSYVGDEAQSK        | +2y8  | 599.76 | 833.40  | 74.8  |

|     |          |        |                     |       |         |         |       |
|-----|----------|--------|---------------------|-------|---------|---------|-------|
| 338 | ACTB     | P60709 | DSYVGDEAQS          | +2y7  | 599.76  | 734.33  | 74.8  |
| 339 | ACTB     | P60709 | DSYVGDEAQS          | +2y6  | 599.76  | 677.31  | 74.8  |
| 340 | ACTB     | P60709 | DSYVGDEAQS          | +2y5  | 599.76  | 562.28  | 74.8  |
| 341 | ACTB     | P60709 | DSYVGDEAQS          | +2y4  | 599.76  | 433.24  | 74.8  |
| 342 | ACTB     | P60709 | GYSFTTTAER          | +2y8  | 566.77  | 912.44  | 72.4  |
| 343 | ACTB     | P60709 | GYSFTTTAER          | +2y7  | 566.77  | 825.41  | 72.4  |
| 344 | ACTB     | P60709 | GYSFTTTAER          | +2y6  | 566.77  | 678.34  | 72.4  |
| 345 | ACTB     | P60709 | GYSFTTTAER          | +2y5  | 566.77  | 577.29  | 72.4  |
| 346 | ACTB     | P60709 | GYSFTTTAER          | +2y4  | 566.77  | 476.25  | 72.4  |
| 347 | ACTB     | P60709 | SYELPDGQVITIGNER    | +2y12 | 895.95  | 1298.67 | 96.4  |
| 348 | ACTB     | P60709 | SYELPDGQVITIGNER    | +2y10 | 895.95  | 1086.59 | 96.4  |
| 349 | ACTB     | P60709 | SYELPDGQVITIGNER    | +2y7  | 895.95  | 802.44  | 96.4  |
| 350 | ACTB     | P60709 | SYELPDGQVITIGNER    | +2y6  | 895.95  | 689.36  | 96.4  |
| 351 | ACTB     | P60709 | SYELPDGQVITIGNER    | +2y4  | 895.95  | 475.23  | 96.4  |
| 352 | ACTB     | P60709 | IIAPPER             | +2y6  | 398.24  | 682.39  | 60.1  |
| 353 | ACTB     | P60709 | IIAPPER             | +2y5  | 398.24  | 569.30  | 60.1  |
| 354 | ACTB     | P60709 | IIAPPER             | +2y4  | 398.24  | 498.27  | 60.1  |
| 355 | ACTB     | P60709 | IIAPPER             | +2y3  | 398.24  | 401.21  | 60.1  |
| 356 | ACTB     | P60709 | IIAPPER             | +2y2  | 398.24  | 304.16  | 60.1  |
| 357 | AFM      | P43652 | SDVGFLPPFPTLDPEEK   | +2y11 | 944.47  | 1269.64 | 100   |
| 358 | AFM      | P43652 | SDVGFLPPFPTLDPEEK   | +2y8  | 944.47  | 928.46  | 100   |
| 359 | AFM      | P43652 | SDVGFLPPFPTLDPEEK   | +2y6  | 944.47  | 730.36  | 100   |
| 360 | AFM      | P43652 | SDVGFLPPFPTLDPEEK   | +2y5  | 944.47  | 617.28  | 100   |
| 361 | AFM      | P43652 | SDVGFLPPFPTLDPEEK   | +2y4  | 944.47  | 502.25  | 100   |
| 362 | AFM      | P43652 | DADPDTHFAK          | +2y8  | 563.76  | 940.44  | 72.2  |
| 363 | AFM      | P43652 | DADPDTHFAK          | +2y7  | 563.76  | 825.41  | 72.2  |
| 364 | AFM      | P43652 | DADPDTHFAK          | +2y6  | 563.76  | 728.36  | 72.2  |
| 365 | AFM      | P43652 | DADPDTHFAK          | +2y5  | 563.76  | 613.33  | 72.2  |
| 366 | AFM      | P43652 | DADPDTHFAK          | +2y3  | 563.76  | 365.22  | 72.2  |
| 367 | AFM      | P43652 | FTFEYSR             | +2y6  | 475.22  | 802.37  | 65.8  |
| 368 | AFM      | P43652 | FTFEYSR             | +2y5  | 475.22  | 701.33  | 65.8  |
| 369 | AFM      | P43652 | FTFEYSR             | +2y4  | 475.22  | 554.26  | 65.8  |
| 370 | AFM      | P43652 | FTFEYSR             | +2y3  | 475.22  | 425.21  | 65.8  |
| 371 | AFM      | P43652 | IAPQLSTEELVSLGEK    | +2y12 | 857.47  | 1304.69 | 93.6  |
| 372 | AFM      | P43652 | IAPQLSTEELVSLGEK    | +2y11 | 857.47  | 1191.61 | 93.6  |
| 373 | AFM      | P43652 | IAPQLSTEELVSLGEK    | +2y8  | 857.47  | 874.49  | 93.6  |
| 374 | AFM      | P43652 | IAPQLSTEELVSLGEK    | +2y5  | 857.47  | 533.29  | 93.6  |
| 375 | AFM      | P43652 | IAPQLSTEELVSLGEK    | +2y4  | 857.47  | 446.26  | 93.6  |
| 376 | AFM      | P43652 | FLVNLVK             | +2y6  | 416.77  | 685.46  | 61.5  |
| 377 | AFM      | P43652 | FLVNLVK             | +2y5  | 416.77  | 572.38  | 61.5  |
| 378 | AFM      | P43652 | FLVNLVK             | +2y4  | 416.77  | 473.31  | 61.5  |
| 379 | AFM      | P43652 | FLVNLVK             | +2y3  | 416.77  | 359.27  | 61.5  |
| 380 | SERPINC1 | P01008 | ATEDEGSEQK          | +2y8  | 547.24  | 921.38  | 71    |
| 381 | SERPINC1 | P01008 | ATEDEGSEQK          | +2y7  | 547.24  | 792.34  | 71    |
| 382 | SERPINC1 | P01008 | ATEDEGSEQK          | +2y6  | 547.24  | 677.31  | 71    |
| 383 | SERPINC1 | P01008 | ATEDEGSEQK          | +2y5  | 547.24  | 548.27  | 71    |
| 384 | SERPINC1 | P01008 | ATEDEGSEQK          | +2y4  | 547.24  | 491.25  | 71    |
| 385 | SERPINC1 | P01008 | SLTFNETYQDISELVYGAK | +2y12 | 1089.53 | 1385.69 | 110.5 |
| 386 | SERPINC1 | P01008 | SLTFNETYQDISELVYGAK | +2y11 | 1089.53 | 1222.63 | 110.5 |
| 387 | SERPINC1 | P01008 | SLTFNETYQDISELVYGAK | +2y8  | 1089.53 | 866.46  | 110.5 |



|     |          |        |                     |       |         |         |       |
|-----|----------|--------|---------------------|-------|---------|---------|-------|
| 388 | SERPINC1 | P01008 | SLTFNETYQDISELVYGAK | +2y6  | 1089.53 | 650.39  | 110.5 |
| 389 | SERPINC1 | P01008 | SLTFNETYQDISELVYGAK | +2y4  | 1089.53 | 438.23  | 110.5 |
| 390 | SERPINC1 | P01008 | VAEGTQVLELPFK       | +2y10 | 715.90  | 1131.64 | 83.3  |
| 391 | SERPINC1 | P01008 | VAEGTQVLELPFK       | +2y7  | 715.90  | 845.51  | 83.3  |
| 392 | SERPINC1 | P01008 | VAEGTQVLELPFK       | +2y6  | 715.90  | 746.44  | 83.3  |
| 393 | SERPINC1 | P01008 | VAEGTQVLELPFK       | +2y4  | 715.90  | 504.32  | 83.3  |
| 394 | SERPINC1 | P01008 | VAEGTQVLELPFK       | +2y3  | 715.90  | 391.23  | 83.3  |
| 395 | SERPINC1 | P01008 | IEDGFSLK            | +2y7  | 454.74  | 795.39  | 64.3  |
| 396 | SERPINC1 | P01008 | IEDGFSLK            | +2y6  | 454.74  | 666.35  | 64.3  |
| 397 | SERPINC1 | P01008 | IEDGFSLK            | +2y5  | 454.74  | 551.32  | 64.3  |
| 398 | SERPINC1 | P01008 | IEDGFSLK            | +2y4  | 454.74  | 494.30  | 64.3  |
| 399 | SERPINC1 | P01008 | IEDGFSLK            | +2y3  | 454.74  | 347.23  | 64.3  |
| 400 | SERPINC1 | P01008 | LPGIVAEGR           | +2y8  | 456.27  | 798.45  | 64.4  |
| 401 | SERPINC1 | P01008 | LPGIVAEGR           | +2y7  | 456.27  | 701.39  | 64.4  |
| 402 | SERPINC1 | P01008 | LPGIVAEGR           | +2y6  | 456.27  | 644.37  | 64.4  |
| 403 | SERPINC1 | P01008 | LPGIVAEGR           | +2y5  | 456.27  | 531.29  | 64.4  |
| 404 | SERPINC1 | P01008 | LPGIVAEGR           | +2y4  | 456.27  | 432.22  | 64.4  |
| 405 | APOA2    | P02652 | SPELQAEAK           | +2y7  | 486.75  | 788.41  | 66.6  |
| 406 | APOA2    | P02652 | SPELQAEAK           | +2y6  | 486.75  | 659.37  | 66.6  |
| 407 | APOA2    | P02652 | SPELQAEAK           | +2y5  | 486.75  | 546.29  | 66.6  |
| 408 | APOA2    | P02652 | SPELQAEAK           | +2y4  | 486.75  | 418.23  | 66.6  |
| 409 | APOA2    | P02652 | SPELQAEAK           | +2y3  | 486.75  | 347.19  | 66.6  |
| 410 | APOA2    | P02652 | EQLTPLIK            | +2y6  | 471.29  | 684.47  | 65.5  |
| 411 | APOA2    | P02652 | EQLTPLIK            | +2y5  | 471.29  | 571.38  | 65.5  |
| 412 | APOA2    | P02652 | EQLTPLIK            | +2y4  | 471.29  | 470.33  | 65.5  |
| 413 | APOA2    | P02652 | EQLTPLIK            | +2y3  | 471.29  | 373.28  | 65.5  |
| 414 | APOB     | P04114 | LEVLFNDFQANAQLSNPK  | +2y12 | 1024.53 | 1332.65 | 105.8 |
| 415 | APOB     | P04114 | LEVLFNDFQANAQLSNPK  | +2y11 | 1024.53 | 1217.63 | 105.8 |
| 416 | APOB     | P04114 | LEVLFNDFQANAQLSNPK  | +2y10 | 1024.53 | 1070.56 | 105.8 |
| 417 | APOB     | P04114 | LEVLFNDFQANAQLSNPK  | +2y9  | 1024.53 | 942.50  | 105.8 |
| 418 | APOB     | P04114 | LEVLFNDFQANAQLSNPK  | +2y8  | 1024.53 | 871.46  | 105.8 |
| 419 | APOB     | P04114 | NNALDFVTK           | +2y7  | 511.27  | 793.45  | 68.4  |
| 420 | APOB     | P04114 | NNALDFVTK           | +2y6  | 511.27  | 722.41  | 68.4  |
| 421 | APOB     | P04114 | NNALDFVTK           | +2y5  | 511.27  | 609.32  | 68.4  |
| 422 | APOB     | P04114 | NNALDFVTK           | +2y4  | 511.27  | 494.30  | 68.4  |
| 423 | APOB     | P04114 | NNALDFVTK           | +2y3  | 511.27  | 347.23  | 68.4  |
| 424 | APOB     | P04114 | SVSDGIAALDLNAVANK   | +2y11 | 829.44  | 1099.61 | 91.6  |
| 425 | APOB     | P04114 | SVSDGIAALDLNAVANK   | +2y10 | 829.44  | 1028.57 | 91.6  |
| 426 | APOB     | P04114 | SVSDGIAALDLNAVANK   | +2y9  | 829.44  | 957.54  | 91.6  |
| 427 | APOB     | P04114 | SVSDGIAALDLNAVANK   | +2y8  | 829.44  | 844.45  | 91.6  |
| 428 | APOB     | P04114 | SVSDGIAALDLNAVANK   | +2y3  | 829.44  | 332.19  | 91.6  |
| 429 | APOB     | P04114 | WNFYSPQSSPDK        | +2y9  | 809.86  | 1008.46 | 90.2  |
| 430 | APOB     | P04114 | WNFYSPQSSPDK        | +2y8  | 809.86  | 845.40  | 90.2  |
| 431 | APOB     | P04114 | WNFYSPQSSPDK        | +2y7  | 809.86  | 758.37  | 90.2  |
| 432 | APOB     | P04114 | WNFYSPQSSPDK        | +2y5  | 809.86  | 533.26  | 90.2  |
| 433 | APOB     | P04114 | WNFYSPQSSPDK        | +2y3  | 809.86  | 359.19  | 90.2  |
| 434 | APOB     | P04114 | NLQDLLQFIFQLIEDNIK  | +2y11 | 1102.60 | 1379.76 | 111.5 |
| 435 | APOB     | P04114 | NLQDLLQFIFQLIEDNIK  | +2y10 | 1102.60 | 1232.69 | 111.5 |
| 436 | APOB     | P04114 | NLQDLLQFIFQLIEDNIK  | +2y9  | 1102.60 | 1119.60 | 111.5 |
| 437 | APOB     | P04114 | NLQDLLQFIFQLIEDNIK  | +2y8  | 1102.60 | 972.54  | 111.5 |

|     |      |        |                    |       |         |         |       |
|-----|------|--------|--------------------|-------|---------|---------|-------|
| 438 | APOB | P04114 | NLQDLLQFIFQLIEDNIK | +2y5  | 1102.60 | 618.31  | 111.5 |
| 439 | APOD | P05090 | IPTTFENGR          | +2y8  | 517.77  | 921.44  | 68.9  |
| 440 | APOD | P05090 | IPTTFENGR          | +2y7  | 517.77  | 824.39  | 68.9  |
| 441 | APOD | P05090 | IPTTFENGR          | +2y6  | 517.77  | 723.34  | 68.9  |
| 442 | APOD | P05090 | IPTTFENGR          | +2y5  | 517.77  | 622.29  | 68.9  |
| 443 | APOD | P05090 | IPTTFENGR          | +2y4  | 517.77  | 475.23  | 68.9  |
| 444 | APOD | P05090 | VLNQELR            | +2y6  | 436.25  | 772.43  | 62.9  |
| 445 | APOD | P05090 | VLNQELR            | +2y5  | 436.25  | 659.35  | 62.9  |
| 446 | APOD | P05090 | VLNQELR            | +2y4  | 436.25  | 545.30  | 62.9  |
| 447 | APOD | P05090 | VLNQELR            | +2y3  | 436.25  | 417.25  | 62.9  |
| 448 | APOD | P05090 | NPNLPPETVDSLK      | +2y10 | 712.38  | 1098.60 | 83    |
| 449 | APOD | P05090 | NPNLPPETVDSLK      | +2y9  | 712.38  | 985.52  | 83    |
| 450 | APOD | P05090 | NPNLPPETVDSLK      | +2y8  | 712.38  | 888.47  | 83    |
| 451 | APOD | P05090 | NPNLPPETVDSLK      | +2y5  | 712.38  | 561.32  | 83    |
| 452 | APOD | P05090 | NILTSNNIDVK        | +2y9  | 615.84  | 1003.54 | 76    |
| 453 | APOD | P05090 | NILTSNNIDVK        | +2y8  | 615.84  | 890.46  | 76    |
| 454 | APOD | P05090 | NILTSNNIDVK        | +2y7  | 615.84  | 789.41  | 76    |
| 455 | APOD | P05090 | NILTSNNIDVK        | +2y6  | 615.84  | 702.38  | 76    |
| 456 | APOD | P05090 | NILTSNNIDVK        | +2y3  | 615.84  | 361.21  | 76    |
| 457 | C9   | P02748 | SIEVFGQFNGK        | +2y9  | 613.31  | 1025.51 | 75.8  |
| 458 | C9   | P02748 | SIEVFGQFNGK        | +2y8  | 613.31  | 896.46  | 75.8  |
| 459 | C9   | P02748 | SIEVFGQFNGK        | +2y7  | 613.31  | 797.39  | 75.8  |
| 460 | C9   | P02748 | SIEVFGQFNGK        | +2y6  | 613.31  | 650.33  | 75.8  |
| 461 | C9   | P02748 | SIEVFGQFNGK        | +2y4  | 613.31  | 465.25  | 75.8  |
| 462 | C9   | P02748 | RPWNVASLIYETK      | +2y8  | 788.93  | 924.50  | 88.6  |
| 463 | C9   | P02748 | RPWNVASLIYETK      | +2y7  | 788.93  | 853.47  | 88.6  |
| 464 | C9   | P02748 | RPWNVASLIYETK      | +2y6  | 788.93  | 766.43  | 88.6  |
| 465 | C9   | P02748 | RPWNVASLIYETK      | +2y5  | 788.93  | 653.35  | 88.6  |
| 466 | C9   | P02748 | RPWNVASLIYETK      | +2y4  | 788.93  | 540.27  | 88.6  |
| 467 | C9   | P02748 | TSNFNAAISLK        | +2y9  | 583.31  | 977.54  | 73.6  |
| 468 | C9   | P02748 | TSNFNAAISLK        | +2y8  | 583.31  | 863.50  | 73.6  |
| 469 | C9   | P02748 | TSNFNAAISLK        | +2y7  | 583.31  | 716.43  | 73.6  |
| 470 | C9   | P02748 | TSNFNAAISLK        | +2y6  | 583.31  | 602.39  | 73.6  |
| 471 | C9   | P02748 | TSNFNAAISLK        | +2y3  | 583.31  | 347.23  | 73.6  |
| 472 | C9   | P02748 | AVNITSENLIDDVVSLIR | +2y12 | 986.04  | 1385.76 | 103   |
| 473 | C9   | P02748 | AVNITSENLIDDVVSLIR | +2y9  | 986.04  | 1029.59 | 103   |
| 474 | C9   | P02748 | AVNITSENLIDDVVSLIR | +2y8  | 986.04  | 916.51  | 103   |
| 475 | C9   | P02748 | AVNITSENLIDDVVSLIR | +2y5  | 986.04  | 587.39  | 103   |
| 476 | C9   | P02748 | AVNITSENLIDDVVSLIR | +2y4  | 986.04  | 488.32  | 103   |
| 477 | C9   | P02748 | AIEDYINEFSVR       | +2y10 | 728.36  | 1271.59 | 84.2  |
| 478 | C9   | P02748 | AIEDYINEFSVR       | +2y9  | 728.36  | 1142.55 | 84.2  |
| 479 | C9   | P02748 | AIEDYINEFSVR       | +2y7  | 728.36  | 864.46  | 84.2  |
| 480 | C9   | P02748 | AIEDYINEFSVR       | +2y6  | 728.36  | 751.37  | 84.2  |
| 481 | C9   | P02748 | AIEDYINEFSVR       | +2y4  | 728.36  | 508.29  | 84.2  |
| 482 | CFH  | P08603 | SPDVINGSPISQK      | +2y9  | 671.35  | 943.52  | 80.1  |
| 483 | CFH  | P08603 | SPDVINGSPISQK      | +2y8  | 671.35  | 830.44  | 80.1  |
| 484 | CFH  | P08603 | SPDVINGSPISQK      | +2y7  | 671.35  | 716.39  | 80.1  |
| 485 | CFH  | P08603 | SPDVINGSPISQK      | +2y5  | 671.35  | 572.34  | 80.1  |
| 486 | CFH  | P08603 | SPDVINGSPISQK      | +2y3  | 671.35  | 362.20  | 80.1  |
| 487 | CFH  | P08603 | RPYFPVAVGK         | +2y6  | 567.33  | 570.36  | 72.5  |

|     |     |        |                      |       |         |         |       |
|-----|-----|--------|----------------------|-------|---------|---------|-------|
| 488 | CFH | P08603 | RPYFPVAVGK           | +2y3  | 567.33  | 303.20  | 72.5  |
| 489 | CFH | P08603 | SSIDIENGFISESQYTYALK | +2y11 | 1133.05 | 1302.66 | 113.7 |
| 490 | CFH | P08603 | SSIDIENGFISESQYTYALK | +2y10 | 1133.05 | 1189.57 | 113.7 |
| 491 | CFH | P08603 | SSIDIENGFISESQYTYALK | +2y9  | 1133.05 | 1102.54 | 113.7 |
| 492 | CFH | P08603 | SSIDIENGFISESQYTYALK | +2y8  | 1133.05 | 973.50  | 113.7 |
| 493 | CFH | P08603 | SSIDIENGFISESQYTYALK | +2y6  | 1133.05 | 758.41  | 113.7 |
| 494 | CFH | P08603 | NDFTWFK              | +2y6  | 479.23  | 843.40  | 66.1  |
| 495 | CFH | P08603 | NDFTWFK              | +2y5  | 479.23  | 728.38  | 66.1  |
| 496 | CFH | P08603 | NDFTWFK              | +2y4  | 479.23  | 581.31  | 66.1  |
| 497 | CFH | P08603 | NDFTWFK              | +2y3  | 479.23  | 480.26  | 66.1  |
| 498 | CFH | P08603 | NGQWSEPPK            | +2y7  | 521.75  | 871.43  | 69.2  |
| 499 | CFH | P08603 | NGQWSEPPK            | +2y6  | 521.75  | 743.37  | 69.2  |
| 500 | CFH | P08603 | NGQWSEPPK            | +2y5  | 521.75  | 557.29  | 69.2  |
| 501 | CFH | P08603 | NGQWSEPPK            | +2y4  | 521.75  | 470.26  | 69.2  |
| 502 | CFH | P08603 | NGQWSEPPK            | +2y3  | 521.75  | 341.22  | 69.2  |
| 503 | FGA | P02671 | GLIDEVNQDFTNR        | +2y10 | 760.87  | 1237.54 | 86.6  |
| 504 | FGA | P02671 | GLIDEVNQDFTNR        | +2y8  | 760.87  | 993.47  | 86.6  |
| 505 | FGA | P02671 | GLIDEVNQDFTNR        | +2y7  | 760.87  | 894.41  | 86.6  |
| 506 | FGA | P02671 | GLIDEVNQDFTNR        | +2y5  | 760.87  | 652.30  | 86.6  |
| 507 | FGA | P02671 | GLIDEVNQDFTNR        | +2y4  | 760.87  | 537.28  | 86.6  |
| 508 | FGA | P02671 | NSLFEYQK             | +2y6  | 514.76  | 827.43  | 68.6  |
| 509 | FGA | P02671 | NSLFEYQK             | +2y5  | 514.76  | 714.35  | 68.6  |
| 510 | FGA | P02671 | NSLFEYQK             | +2y4  | 514.76  | 567.28  | 68.6  |
| 511 | FGA | P02671 | NSLFEYQK             | +2y3  | 514.76  | 438.23  | 68.6  |
| 512 | FGA | P02671 | GGSTSYGTGSETESPR     | +2y11 | 786.84  | 1183.52 | 88.5  |
| 513 | FGA | P02671 | GGSTSYGTGSETESPR     | +2y10 | 786.84  | 1020.46 | 88.5  |
| 514 | FGA | P02671 | GGSTSYGTGSETESPR     | +2y8  | 786.84  | 862.39  | 88.5  |
| 515 | FGA | P02671 | GGSTSYGTGSETESPR     | +2y5  | 786.84  | 589.29  | 88.5  |
| 516 | FGA | P02671 | GGSTSYGTGSETESPR     | +2y3  | 786.84  | 359.20  | 88.5  |
| 517 | FGA | P02671 | QFTSSTSYNR           | +2y8  | 595.78  | 915.42  | 74.5  |
| 518 | FGA | P02671 | QFTSSTSYNR           | +2y7  | 595.78  | 814.37  | 74.5  |
| 519 | FGA | P02671 | QFTSSTSYNR           | +2y6  | 595.78  | 727.34  | 74.5  |
| 520 | FGA | P02671 | QFTSSTSYNR           | +2y5  | 595.78  | 640.30  | 74.5  |
| 521 | FGA | P02671 | QFTSSTSYNR           | +2y4  | 595.78  | 539.26  | 74.5  |
| 522 | FGA | P02671 | NNSPYEINGVVVVSFR     | +2y10 | 1005.49 | 1192.61 | 104.4 |
| 523 | FGA | P02671 | NNSPYEINGVVVVSFR     | +2y6  | 1005.49 | 793.44  | 104.4 |
| 524 | FGA | P02671 | NNSPYEINGVVVVSFR     | +2y5  | 1005.49 | 694.37  | 104.4 |
| 525 | FGA | P02671 | NNSPYEINGVVVVSFR     | +2y4  | 1005.49 | 508.29  | 104.4 |
| 526 | FGA | P02671 | NNSPYEINGVVVVSFR     | +2y3  | 1005.49 | 409.22  | 104.4 |
| 527 | GSN | P06396 | EVQGFESATFLGYFK      | +2y12 | 861.92  | 1366.67 | 94    |
| 528 | GSN | P06396 | EVQGFESATFLGYFK      | +2y10 | 861.92  | 1162.58 | 94    |
| 529 | GSN | P06396 | EVQGFESATFLGYFK      | +2y9  | 861.92  | 1033.54 | 94    |
| 530 | GSN | P06396 | EVQGFESATFLGYFK      | +2y7  | 861.92  | 875.47  | 94    |
| 531 | GSN | P06396 | EVQGFESATFLGYFK      | +2y4  | 861.92  | 514.27  | 94    |
| 532 | GSN | P06396 | GGVASGFK             | +2y6  | 361.70  | 608.34  | 57.5  |
| 533 | GSN | P06396 | GGVASGFK             | +2y5  | 361.70  | 509.27  | 57.5  |
| 534 | GSN | P06396 | GGVASGFK             | +2y4  | 361.70  | 438.23  | 57.5  |
| 535 | GSN | P06396 | GGVASGFK             | +2y3  | 361.70  | 351.20  | 57.5  |
| 536 | GSN | P06396 | AGALNSNDAFVLK        | +2y9  | 660.35  | 1007.52 | 79.3  |
| 537 | GSN | P06396 | AGALNSNDAFVLK        | +2y8  | 660.35  | 893.47  | 79.3  |

|     |      |        |                     |       |        |         |      |
|-----|------|--------|---------------------|-------|--------|---------|------|
| 538 | GSN  | P06396 | AGALNSNDAFVLK       | +2y7  | 660.35 | 806.44  | 79.3 |
| 539 | GSN  | P06396 | AGALNSNDAFVLK       | +2y5  | 660.35 | 577.37  | 79.3 |
| 540 | GSN  | P06396 | AGALNSNDAFVLK       | +2y3  | 660.35 | 359.27  | 79.3 |
| 541 | GSN  | P06396 | TPSAAYLWVG TGASEAEK | +2y11 | 919.45 | 1134.54 | 98.1 |
| 542 | GSN  | P06396 | TPSAAYLWVG TGASEAEK | +2y10 | 919.45 | 948.46  | 98.1 |
| 543 | GSN  | P06396 | TPSAAYLWVG TGASEAEK | +2y9  | 919.45 | 849.39  | 98.1 |
| 544 | GSN  | P06396 | TPSAAYLWVG TGASEAEK | +2y7  | 919.45 | 691.33  | 98.1 |
| 545 | GSN  | P06396 | TPSAAYLWVG TGASEAEK | +2y5  | 919.45 | 563.27  | 98.1 |
| 546 | GSN  | P06396 | TPITVVK             | +2y6  | 379.24 | 656.43  | 58.8 |
| 547 | GSN  | P06396 | TPITVVK             | +2y5  | 379.24 | 559.38  | 58.8 |
| 548 | GSN  | P06396 | TPITVVK             | +2y4  | 379.24 | 446.30  | 58.8 |
| 549 | GSN  | P06396 | TPITVVK             | +2y3  | 379.24 | 345.25  | 58.8 |
| 550 | CFB  | P00751 | STGSWSTLK           | +2y7  | 483.75 | 778.41  | 66.4 |
| 551 | CFB  | P00751 | STGSWSTLK           | +2y6  | 483.75 | 721.39  | 66.4 |
| 552 | CFB  | P00751 | STGSWSTLK           | +2y5  | 483.75 | 634.36  | 66.4 |
| 553 | CFB  | P00751 | STGSWSTLK           | +2y4  | 483.75 | 448.28  | 66.4 |
| 554 | CFB  | P00751 | STGSWSTLK           | +2y3  | 483.75 | 361.24  | 66.4 |
| 555 | CFB  | P00751 | YGLVTYATYPK         | +2y8  | 638.33 | 942.49  | 77.7 |
| 556 | CFB  | P00751 | YGLVTYATYPK         | +2y7  | 638.33 | 843.42  | 77.7 |
| 557 | CFB  | P00751 | YGLVTYATYPK         | +2y6  | 638.33 | 742.38  | 77.7 |
| 558 | CFB  | P00751 | YGLVTYATYPK         | +2y5  | 638.33 | 579.31  | 77.7 |
| 559 | CFB  | P00751 | YGLVTYATYPK         | +2y3  | 638.33 | 407.23  | 77.7 |
| 560 | CFB  | P00751 | VSEADSSNADWVTK      | +2y10 | 754.85 | 1122.51 | 86.1 |
| 561 | CFB  | P00751 | VSEADSSNADWVTK      | +2y9  | 754.85 | 1007.48 | 86.1 |
| 562 | CFB  | P00751 | VSEADSSNADWVTK      | +2y8  | 754.85 | 920.45  | 86.1 |
| 563 | CFB  | P00751 | VSEADSSNADWVTK      | +2y7  | 754.85 | 833.42  | 86.1 |
| 564 | CFB  | P00751 | VSEADSSNADWVTK      | +2y4  | 754.85 | 533.31  | 86.1 |
| 565 | CFB  | P00751 | ISVIRPSK            | +2y7  | 450.29 | 786.48  | 63.9 |
| 566 | CFB  | P00751 | ISVIRPSK            | +2y6  | 450.29 | 699.45  | 63.9 |
| 567 | CFB  | P00751 | ISVIRPSK            | +2y5  | 450.29 | 600.38  | 63.9 |
| 568 | CFB  | P00751 | ISVIRPSK            | +2y4  | 450.29 | 487.30  | 63.9 |
| 569 | CFB  | P00751 | ISVIRPSK            | +2y3  | 450.29 | 331.20  | 63.9 |
| 570 | CFB  | P00751 | DAQYAPGYDK          | +2y7  | 564.25 | 813.38  | 72.3 |
| 571 | CFB  | P00751 | DAQYAPGYDK          | +2y6  | 564.25 | 650.31  | 72.3 |
| 572 | CFB  | P00751 | DAQYAPGYDK          | +2y5  | 564.25 | 579.28  | 72.3 |
| 573 | CFB  | P00751 | DAQYAPGYDK          | +2y4  | 564.25 | 482.22  | 72.3 |
| 574 | CFB  | P00751 | DAQYAPGYDK          | +2y3  | 564.25 | 425.20  | 72.3 |
| 575 | AHSG | P02765 | FSVVYAK             | +2y6  | 407.23 | 666.38  | 60.8 |
| 576 | AHSG | P02765 | FSVVYAK             | +2y5  | 407.23 | 579.35  | 60.8 |
| 577 | AHSG | P02765 | FSVVYAK             | +2y4  | 407.23 | 480.28  | 60.8 |
| 578 | AHSG | P02765 | FSVVYAK             | +2y3  | 407.23 | 381.21  | 60.8 |
| 579 | GC   | D6RF35 | EDFTSLSLVLYSR       | +2y7  | 765.40 | 837.48  | 86.9 |
| 580 | GC   | D6RF35 | EDFTSLSLVLYSR       | +2y6  | 765.40 | 750.45  | 86.9 |
| 581 | GC   | D6RF35 | EDFTSLSLVLYSR       | +2y5  | 765.40 | 637.37  | 86.9 |
| 582 | GC   | D6RF35 | EDFTSLSLVLYSR       | +2y4  | 765.40 | 538.30  | 86.9 |
| 583 | GC   | D6RF35 | EDFTSLSLVLYSR       | +2y3  | 765.40 | 425.21  | 86.9 |
| 584 | GC   | D6RF35 | FPSGTFEQVSQLVK      | +2y9  | 783.91 | 1077.59 | 88.3 |
| 585 | GC   | D6RF35 | FPSGTFEQVSQLVK      | +2y8  | 783.91 | 930.53  | 88.3 |
| 586 | GC   | D6RF35 | FPSGTFEQVSQLVK      | +2y7  | 783.91 | 801.48  | 88.3 |
| 587 | GC   | D6RF35 | FPSGTFEQVSQLVK      | +2y6  | 783.91 | 673.42  | 88.3 |

|     |       |        |                     |       |         |         |       |
|-----|-------|--------|---------------------|-------|---------|---------|-------|
| 588 | GC    | D6RF35 | FPSGTFEQVSQLVK      | +2y5  | 783.91  | 574.36  | 88.3  |
| 589 | GC    | D6RF35 | VLEPTLK             | +2y6  | 400.25  | 700.42  | 60.3  |
| 590 | GC    | D6RF35 | VLEPTLK             | +2y5  | 400.25  | 587.34  | 60.3  |
| 591 | GC    | D6RF35 | VLEPTLK             | +2y4  | 400.25  | 458.30  | 60.3  |
| 592 | GC    | D6RF35 | VLEPTLK             | +2y3  | 400.25  | 361.24  | 60.3  |
| 593 | GC    | D6RF35 | ELSSFIDK            | +2y6  | 469.75  | 696.36  | 65.4  |
| 594 | GC    | D6RF35 | ELSSFIDK            | +2y5  | 469.75  | 609.32  | 65.4  |
| 595 | GC    | D6RF35 | ELSSFIDK            | +2y4  | 469.75  | 522.29  | 65.4  |
| 596 | GC    | D6RF35 | ELSSFIDK            | +2y3  | 469.75  | 375.22  | 65.4  |
| 597 | GC    | D6RF35 | LPDATPTELAK         | +2y10 | 578.32  | 1042.54 | 73.3  |
| 598 | GC    | D6RF35 | LPDATPTELAK         | +2y9  | 578.32  | 945.49  | 73.3  |
| 599 | GC    | D6RF35 | LPDATPTELAK         | +2y8  | 578.32  | 830.46  | 73.3  |
| 600 | GC    | D6RF35 | LPDATPTELAK         | +2y7  | 578.32  | 759.42  | 73.3  |
| 601 | GC    | D6RF35 | LPDATPTELAK         | +2y6  | 578.32  | 658.38  | 73.3  |
| 602 | ITIH2 | P19823 | VQSTITSR            | +2y7  | 446.25  | 792.42  | 63.6  |
| 603 | ITIH2 | P19823 | VQSTITSR            | +2y6  | 446.25  | 664.36  | 63.6  |
| 604 | ITIH2 | P19823 | VQSTITSR            | +2y5  | 446.25  | 577.33  | 63.6  |
| 605 | ITIH2 | P19823 | VQSTITSR            | +2y4  | 446.25  | 476.28  | 63.6  |
| 606 | ITIH2 | P19823 | VQSTITSR            | +2y3  | 446.25  | 363.20  | 63.6  |
| 607 | ITIH2 | P19823 | ETAVDGELVVLYDVK     | +2y11 | 825.44  | 1249.67 | 91.3  |
| 608 | ITIH2 | P19823 | ETAVDGELVVLYDVK     | +2y7  | 825.44  | 835.49  | 91.3  |
| 609 | ITIH2 | P19823 | ETAVDGELVVLYDVK     | +2y6  | 825.44  | 736.42  | 91.3  |
| 610 | ITIH2 | P19823 | ETAVDGELVVLYDVK     | +2y5  | 825.44  | 637.36  | 91.3  |
| 611 | ITIH2 | P19823 | ETAVDGELVVLYDVK     | +2y4  | 825.44  | 524.27  | 91.3  |
| 612 | ITIH2 | P19823 | IQPSGGTNINEALLR     | +2y13 | 791.93  | 1341.71 | 88.8  |
| 613 | ITIH2 | P19823 | IQPSGGTNINEALLR     | +2y11 | 791.93  | 1157.63 | 88.8  |
| 614 | ITIH2 | P19823 | IQPSGGTNINEALLR     | +2y8  | 791.93  | 942.54  | 88.8  |
| 615 | ITIH2 | P19823 | IQPSGGTNINEALLR     | +2y6  | 791.93  | 715.41  | 88.8  |
| 616 | ITIH2 | P19823 | IQPSGGTNINEALLR     | +2y4  | 791.93  | 472.32  | 88.8  |
| 617 | ITIH2 | P19823 | IYGNQDTSSQLK        | +2y10 | 677.34  | 1077.52 | 80.5  |
| 618 | ITIH2 | P19823 | IYGNQDTSSQLK        | +2y8  | 677.34  | 906.45  | 80.5  |
| 619 | ITIH2 | P19823 | IYGNQDTSSQLK        | +2y7  | 677.34  | 778.39  | 80.5  |
| 620 | ITIH2 | P19823 | IYGNQDTSSQLK        | +2y6  | 677.34  | 663.37  | 80.5  |
| 621 | ITIH2 | P19823 | IYGNQDTSSQLK        | +2y5  | 677.34  | 562.32  | 80.5  |
| 622 | ITIH2 | P19823 | LWAYLTINQLLAER      | +2y9  | 852.48  | 1057.60 | 93.3  |
| 623 | ITIH2 | P19823 | LWAYLTINQLLAER      | +2y8  | 852.48  | 956.55  | 93.3  |
| 624 | ITIH2 | P19823 | LWAYLTINQLLAER      | +2y7  | 852.48  | 843.47  | 93.3  |
| 625 | ITIH2 | P19823 | LWAYLTINQLLAER      | +2y5  | 852.48  | 601.37  | 93.3  |
| 626 | ITIH2 | P19823 | LWAYLTINQLLAER      | +2y3  | 852.48  | 375.20  | 93.3  |
| 627 | ITIH1 | P19827 | QAVDTAVDGVFIR       | +2y10 | 695.87  | 1092.57 | 81.8  |
| 628 | ITIH1 | P19827 | QAVDTAVDGVFIR       | +2y8  | 695.87  | 876.49  | 81.8  |
| 629 | ITIH1 | P19827 | QAVDTAVDGVFIR       | +2y7  | 695.87  | 805.46  | 81.8  |
| 630 | ITIH1 | P19827 | QAVDTAVDGVFIR       | +2y6  | 695.87  | 706.39  | 81.8  |
| 631 | ITIH1 | P19827 | QAVDTAVDGVFIR       | +2y5  | 695.87  | 591.36  | 81.8  |
| 632 | ITIH1 | P19827 | LDAQASFLPK          | +2y9  | 545.30  | 976.51  | 70.9  |
| 633 | ITIH1 | P19827 | LDAQASFLPK          | +2y8  | 545.30  | 861.48  | 70.9  |
| 634 | ITIH1 | P19827 | LDAQASFLPK          | +2y7  | 545.30  | 790.45  | 70.9  |
| 635 | ITIH1 | P19827 | LDAQASFLPK          | +2y6  | 545.30  | 662.39  | 70.9  |
| 636 | ITIH1 | P19827 | LDAQASFLPK          | +2y5  | 545.30  | 591.35  | 70.9  |
| 637 | ITIH1 | P19827 | GSLVQASEANLQAAQDFVR | +2y10 | 1002.51 | 1161.60 | 104.2 |

|     |       |        |                     |       |         |         |       |
|-----|-------|--------|---------------------|-------|---------|---------|-------|
| 638 | ITIH1 | P19827 | GSLVQASEANLQAAQDFVR | +2y8  | 1002.51 | 934.47  | 104.2 |
| 639 | ITIH1 | P19827 | GSLVQASEANLQAAQDFVR | +2y7  | 1002.51 | 806.42  | 104.2 |
| 640 | ITIH1 | P19827 | GSLVQASEANLQAAQDFVR | +2y6  | 1002.51 | 735.38  | 104.2 |
| 641 | ITIH1 | P19827 | GSLVQASEANLQAAQDFVR | +2y3  | 1002.51 | 421.26  | 104.2 |
| 642 | ITIH1 | P19827 | QYYEGSEIVVAGR       | +2y10 | 735.86  | 1016.54 | 84.8  |
| 643 | ITIH1 | P19827 | QYYEGSEIVVAGR       | +2y9  | 735.86  | 887.49  | 84.8  |
| 644 | ITIH1 | P19827 | QYYEGSEIVVAGR       | +2y5  | 735.86  | 501.31  | 84.8  |
| 645 | ITIH1 | P19827 | QYYEGSEIVVAGR       | +2y4  | 735.86  | 402.25  | 84.8  |
| 646 | ITIH1 | P19827 | QYYEGSEIVVAGR       | +2y3  | 735.86  | 303.18  | 84.8  |
| 647 | ITIH1 | P19827 | LWAYLTIQELLAK       | +2y11 | 781.45  | 1262.74 | 88.1  |
| 648 | ITIH1 | P19827 | LWAYLTIQELLAK       | +2y9  | 781.45  | 1028.64 | 88.1  |
| 649 | ITIH1 | P19827 | LWAYLTIQELLAK       | +2y8  | 781.45  | 915.55  | 88.1  |
| 650 | ITIH1 | P19827 | LWAYLTIQELLAK       | +2y7  | 781.45  | 814.50  | 88.1  |
| 651 | ITIH1 | P19827 | LWAYLTIQELLAK       | +2y3  | 781.45  | 331.23  | 88.1  |
| 652 | PLG   | P00747 | DVVLFEK             | +2y5  | 425.24  | 635.38  | 62.1  |
| 653 | PLG   | P00747 | DVVLFEK             | +2y4  | 425.24  | 536.31  | 62.1  |
| 654 | PLG   | P00747 | DVVLFEK             | +2y3  | 425.24  | 423.22  | 62.1  |
| 655 | PLG   | P00747 | LFLEPTR             | +2y6  | 438.25  | 762.41  | 63.1  |
| 656 | PLG   | P00747 | LFLEPTR             | +2y5  | 438.25  | 615.35  | 63.1  |
| 657 | PLG   | P00747 | LFLEPTR             | +2y4  | 438.25  | 502.26  | 63.1  |
| 658 | PLG   | P00747 | LFLEPTR             | +2y3  | 438.25  | 373.22  | 63.1  |
| 659 | PLG   | P00747 | LSSPAVITDK          | +2y9  | 515.79  | 917.49  | 68.7  |
| 660 | PLG   | P00747 | LSSPAVITDK          | +2y8  | 515.79  | 830.46  | 68.7  |
| 661 | PLG   | P00747 | LSSPAVITDK          | +2y7  | 515.79  | 743.43  | 68.7  |
| 662 | PLG   | P00747 | LSSPAVITDK          | +2y5  | 515.79  | 575.34  | 68.7  |
| 663 | PLG   | P00747 | LSSPAVITDK          | +2y4  | 515.79  | 476.27  | 68.7  |
| 664 | PLG   | P00747 | EAQLPVIENK          | +2y7  | 570.82  | 812.49  | 72.7  |
| 665 | PLG   | P00747 | EAQLPVIENK          | +2y6  | 570.82  | 699.40  | 72.7  |
| 666 | PLG   | P00747 | EAQLPVIENK          | +2y5  | 570.82  | 602.35  | 72.7  |
| 667 | PLG   | P00747 | EAQLPVIENK          | +2y4  | 570.82  | 503.28  | 72.7  |
| 668 | PLG   | P00747 | EAQLPVIENK          | +2y3  | 570.82  | 390.20  | 72.7  |
| 669 | PLG   | P00747 | YEFLNGR             | +2y6  | 449.72  | 735.38  | 63.9  |
| 670 | PLG   | P00747 | YEFLNGR             | +2y5  | 449.72  | 606.34  | 63.9  |
| 671 | PLG   | P00747 | YEFLNGR             | +2y4  | 449.72  | 459.27  | 63.9  |
| 672 | PLG   | P00747 | YEFLNGR             | +2y3  | 449.72  | 346.18  | 63.9  |
| 673 | RBP4  | Q5VY30 | YWGVASFQK           | +2y8  | 599.82  | 849.48  | 74.8  |
| 674 | RBP4  | Q5VY30 | YWGVASFQK           | +2y7  | 599.82  | 792.46  | 74.8  |
| 675 | RBP4  | Q5VY30 | YWGVASFQK           | +2y6  | 599.82  | 693.39  | 74.8  |
| 676 | RBP4  | Q5VY30 | YWGVASFQK           | +2y5  | 599.82  | 622.36  | 74.8  |
| 677 | RBP4  | Q5VY30 | YWGVASFQK           | +2y3  | 599.82  | 388.26  | 74.8  |
| 678 | RBP4  | Q5VY30 | DPNGLPPEAQK         | +2y9  | 583.30  | 953.51  | 73.6  |
| 679 | RBP4  | Q5VY30 | DPNGLPPEAQK         | +2y8  | 583.30  | 839.46  | 73.6  |
| 680 | RBP4  | Q5VY30 | DPNGLPPEAQK         | +2y7  | 583.30  | 782.44  | 73.6  |
| 681 | RBP4  | Q5VY30 | DPNGLPPEAQK         | +2y6  | 583.30  | 669.36  | 73.6  |
| 682 | RBP4  | Q5VY30 | DPNGLPPEAQK         | +2y5  | 583.30  | 572.30  | 73.6  |
| 683 | KNG1  | P01042 | YNSQSQSNNQFVLYR     | +2y7  | 937.94  | 939.50  | 99.5  |
| 684 | KNG1  | P01042 | YNSQSQSNNQFVLYR     | +2y5  | 937.94  | 697.40  | 99.5  |
| 685 | KNG1  | P01042 | YNSQSQSNNQFVLYR     | +2y4  | 937.94  | 550.33  | 99.5  |
| 686 | KNG1  | P01042 | YNSQSQSNNQFVLYR     | +2y3  | 937.94  | 451.27  | 99.5  |
| 687 | KNG1  | P01042 | YNSQSQSNNQFVLYR     | +2y2  | 937.94  | 338.18  | 99.5  |

|     |       |        |                     |       |         |         |       |
|-----|-------|--------|---------------------|-------|---------|---------|-------|
| 688 | KNG1  | P01042 | QVVAGLNFR           | +2y7  | 502.29  | 776.44  | 67.7  |
| 689 | KNG1  | P01042 | QVVAGLNFR           | +2y6  | 502.29  | 677.37  | 67.7  |
| 690 | KNG1  | P01042 | QVVAGLNFR           | +2y5  | 502.29  | 606.34  | 67.7  |
| 691 | KNG1  | P01042 | QVVAGLNFR           | +2y4  | 502.29  | 549.31  | 67.7  |
| 692 | KNG1  | P01042 | QVVAGLNFR           | +2y3  | 502.29  | 436.23  | 67.7  |
| 693 | KNG1  | P01042 | DFVQPPTK            | +2y6  | 466.25  | 669.39  | 65.1  |
| 694 | KNG1  | P01042 | DFVQPPTK            | +2y5  | 466.25  | 570.32  | 65.1  |
| 695 | KNG1  | P01042 | DFVQPPTK            | +2y4  | 466.25  | 442.27  | 65.1  |
| 696 | KNG1  | P01042 | DFVQPPTK            | +2y3  | 466.25  | 345.21  | 65.1  |
| 697 | KNG1  | P01042 | RPPGFSPFR           | +2y8  | 530.79  | 904.47  | 69.8  |
| 698 | KNG1  | P01042 | RPPGFSPFR           | +2y7  | 530.79  | 807.41  | 69.8  |
| 699 | KNG1  | P01042 | RPPGFSPFR           | +2y6  | 530.79  | 710.36  | 69.8  |
| 700 | KNG1  | P01042 | RPPGFSPFR           | +2y5  | 530.79  | 653.34  | 69.8  |
| 701 | KNG1  | P01042 | RPPGFSPFR           | +2y3  | 530.79  | 419.24  | 69.8  |
| 702 | KNG1  | P01042 | ESYYFDLTDGLS        | +2y9  | 705.31  | 1030.47 | 82.5  |
| 703 | KNG1  | P01042 | ESYYFDLTDGLS        | +2y8  | 705.31  | 867.41  | 82.5  |
| 704 | KNG1  | P01042 | ESYYFDLTDGLS        | +2y7  | 705.31  | 720.34  | 82.5  |
| 705 | KNG1  | P01042 | ESYYFDLTDGLS        | +2y6  | 705.31  | 605.31  | 82.5  |
| 706 | KNG1  | P01042 | ESYYFDLTDGLS        | +2y5  | 705.31  | 492.23  | 82.5  |
| 707 | APP   | E9PG40 | TTSIATTTTTTESVEEVVR | +2y11 | 1064.04 | 1249.63 | 108.7 |
| 708 | APP   | E9PG40 | TTSIATTTTTTESVEEVVR | +2y9  | 1064.04 | 1047.53 | 108.7 |
| 709 | APP   | E9PG40 | TTSIATTTTTTESVEEVVR | +2y8  | 1064.04 | 946.48  | 108.7 |
| 710 | APP   | E9PG40 | TTSIATTTTTTESVEEVVR | +2y7  | 1064.04 | 817.44  | 108.7 |
| 711 | APP   | E9PG40 | TTSIATTTTTTESVEEVVR | +2y5  | 1064.04 | 631.34  | 108.7 |
| 712 | APP   | E9PG40 | WYFDVTEGK           | +2y7  | 572.77  | 795.39  | 72.9  |
| 713 | APP   | E9PG40 | WYFDVTEGK           | +2y6  | 572.77  | 648.32  | 72.9  |
| 714 | APP   | E9PG40 | WYFDVTEGK           | +2y5  | 572.77  | 533.29  | 72.9  |
| 715 | APP   | E9PG40 | WYFDVTEGK           | +2y4  | 572.77  | 434.22  | 72.9  |
| 716 | APP   | E9PG40 | WYFDVTEGK           | +2y3  | 572.77  | 333.18  | 72.9  |
| 717 | APP   | E9PG40 | LPTTAASTPDAVDK      | +2y12 | 693.86  | 1176.57 | 81.7  |
| 718 | APP   | E9PG40 | LPTTAASTPDAVDK      | +2y10 | 693.86  | 974.48  | 81.7  |
| 719 | APP   | E9PG40 | LPTTAASTPDAVDK      | +2y8  | 693.86  | 832.40  | 81.7  |
| 720 | APP   | E9PG40 | LPTTAASTPDAVDK      | +2y7  | 693.86  | 745.37  | 81.7  |
| 721 | APP   | E9PG40 | LPTTAASTPDAVDK      | +2y6  | 693.86  | 644.32  | 81.7  |
| 722 | APP   | E9PG40 | VESLEQEAAANER       | +2y8  | 687.83  | 946.42  | 81.3  |
| 723 | APP   | E9PG40 | VESLEQEAAANER       | +2y7  | 687.83  | 817.38  | 81.3  |
| 724 | APP   | E9PG40 | VESLEQEAAANER       | +2y5  | 687.83  | 560.28  | 81.3  |
| 725 | APP   | E9PG40 | VESLEQEAAANER       | +2y4  | 687.83  | 489.24  | 81.3  |
| 726 | APP   | E9PG40 | VESLEQEAAANER       | +2y3  | 687.83  | 418.20  | 81.3  |
| 727 | APP   | E9PG40 | LVFFAEDVGSNK        | +2y10 | 663.34  | 1113.52 | 79.5  |
| 728 | APP   | E9PG40 | LVFFAEDVGSNK        | +2y9  | 663.34  | 966.45  | 79.5  |
| 729 | APP   | E9PG40 | LVFFAEDVGSNK        | +2y8  | 663.34  | 819.38  | 79.5  |
| 730 | APP   | E9PG40 | LVFFAEDVGSNK        | +2y7  | 663.34  | 748.35  | 79.5  |
| 731 | APP   | E9PG40 | LVFFAEDVGSNK        | +2y4  | 663.34  | 405.21  | 79.5  |
| 732 | APLP2 | Q06481 | WEPDPTGTK           | +2y8  | 515.75  | 844.40  | 68.7  |
| 733 | APLP2 | Q06481 | WEPDPTGTK           | +2y7  | 515.75  | 715.36  | 68.7  |
| 734 | APLP2 | Q06481 | WEPDPTGTK           | +2y6  | 515.75  | 618.31  | 68.7  |
| 735 | APLP2 | Q06481 | WEPDPTGTK           | +2y5  | 515.75  | 503.28  | 68.7  |
| 736 | APLP2 | Q06481 | WEPDPTGTK           | +2y4  | 515.75  | 406.23  | 68.7  |
| 737 | APLP2 | Q06481 | EWEEAELQAK          | +2y7  | 616.79  | 788.41  | 76.1  |

|     |       |        |                      |       |         |         |       |
|-----|-------|--------|----------------------|-------|---------|---------|-------|
| 738 | APLP2 | Q06481 | EWEEAELQAK           | +2y6  | 616.79  | 659.37  | 76.1  |
| 739 | APLP2 | Q06481 | EWEEAELQAK           | +2y5  | 616.79  | 588.34  | 76.1  |
| 740 | APLP2 | Q06481 | EWEEAELQAK           | +2y4  | 616.79  | 459.29  | 76.1  |
| 741 | APLP2 | Q06481 | EWEEAELQAK           | +2y3  | 616.79  | 346.21  | 76.1  |
| 742 | APLP2 | Q06481 | VPYVAQEIQEEIDELLQEQR | +2y10 | 1215.11 | 1272.64 | 119.7 |
| 743 | APLP2 | Q06481 | VPYVAQEIQEEIDELLQEQR | +2y8  | 1215.11 | 1030.52 | 119.7 |
| 744 | APLP2 | Q06481 | VPYVAQEIQEEIDELLQEQR | +2y7  | 1215.11 | 915.49  | 119.7 |
| 745 | APLP2 | Q06481 | VPYVAQEIQEEIDELLQEQR | +2y6  | 1215.11 | 786.45  | 119.7 |
| 746 | APLP2 | Q06481 | VPYVAQEIQEEIDELLQEQR | +2y5  | 1215.11 | 673.36  | 119.7 |
| 747 | APLP2 | Q06481 | GSGVGGEQDGGGIGAEK    | +2y13 | 801.88  | 1302.62 | 89.6  |
| 748 | APLP2 | Q06481 | GSGVGGEQDGGGIGAEK    | +2y10 | 801.88  | 988.49  | 89.6  |
| 749 | APLP2 | Q06481 | GSGVGGEQDGGGIGAEK    | +2y9  | 801.88  | 873.47  | 89.6  |
| 750 | APLP2 | Q06481 | GSGVGGEQDGGGIGAEK    | +2y6  | 801.88  | 646.34  | 89.6  |
| 751 | APLP2 | Q06481 | GSGVGGEQDGGGIGAEK    | +2y5  | 801.88  | 533.26  | 89.6  |
| 752 | APLP2 | Q06481 | VGGLEEEER            | +2y7  | 444.72  | 789.37  | 63.5  |
| 753 | APLP2 | Q06481 | VGGLEEEER            | +2y6  | 444.72  | 732.35  | 63.5  |
| 754 | APLP2 | Q06481 | VGGLEEEER            | +2y4  | 444.72  | 562.25  | 63.5  |
| 755 | APLP2 | Q06481 | VGGLEEEER            | +2y3  | 444.72  | 433.20  | 63.5  |
| 756 | APLP2 | Q06481 | VGGLEEEER            | +2y2  | 444.72  | 304.16  | 63.5  |
| 757 | CDH2  | P19022 | VQYSESSEPADFK        | +2y10 | 700.32  | 1172.51 | 82.2  |
| 758 | CDH2  | P19022 | VQYSESSEPADFK        | +2y9  | 700.32  | 1009.45 | 82.2  |
| 759 | CDH2  | P19022 | VQYSESSEPADFK        | +2y8  | 700.32  | 880.40  | 82.2  |
| 760 | CDH2  | P19022 | VQYSESSEPADFK        | +2y7  | 700.32  | 793.37  | 82.2  |
| 761 | CDH2  | P19022 | VQYSESSEPADFK        | +2y5  | 700.32  | 577.30  | 82.2  |
| 762 | CDH2  | P19022 | ESAEVEEIVFPR         | +2y8  | 702.85  | 988.55  | 82.4  |
| 763 | CDH2  | P19022 | ESAEVEEIVFPR         | +2y7  | 702.85  | 889.48  | 82.4  |
| 764 | CDH2  | P19022 | ESAEVEEIVFPR         | +2y5  | 702.85  | 631.39  | 82.4  |
| 765 | CDH2  | P19022 | ESAEVEEIVFPR         | +2y4  | 702.85  | 518.31  | 82.4  |
| 766 | CDH2  | P19022 | ESAEVEEIVFPR         | +2y3  | 702.85  | 419.24  | 82.4  |
| 767 | CDH2  | P19022 | LSDPANWLK            | +2y8  | 522.28  | 930.47  | 69.2  |
| 768 | CDH2  | P19022 | LSDPANWLK            | +2y7  | 522.28  | 843.44  | 69.2  |
| 769 | CDH2  | P19022 | LSDPANWLK            | +2y6  | 522.28  | 728.41  | 69.2  |
| 770 | CDH2  | P19022 | LSDPANWLK            | +2y5  | 522.28  | 631.36  | 69.2  |
| 771 | CDH2  | P19022 | LSDPANWLK            | +2y3  | 522.28  | 446.28  | 69.2  |
| 772 | CDH2  | P19022 | LNGDFAQLNLK          | +2y9  | 616.84  | 1005.54 | 76.1  |
| 773 | CDH2  | P19022 | LNGDFAQLNLK          | +2y7  | 616.84  | 833.49  | 76.1  |
| 774 | CDH2  | P19022 | LNGDFAQLNLK          | +2y6  | 616.84  | 686.42  | 76.1  |
| 775 | CDH2  | P19022 | LNGDFAQLNLK          | +2y4  | 616.84  | 487.32  | 76.1  |
| 776 | CDH2  | P19022 | LNGDFAQLNLK          | +2y3  | 616.84  | 374.24  | 76.1  |
| 777 | CDH2  | P19022 | QLLIDPEDDVR          | +2y9  | 656.84  | 1071.53 | 79    |
| 778 | CDH2  | P19022 | QLLIDPEDDVR          | +2y8  | 656.84  | 958.45  | 79    |
| 779 | CDH2  | P19022 | QLLIDPEDDVR          | +2y7  | 656.84  | 845.36  | 79    |
| 780 | CDH2  | P19022 | QLLIDPEDDVR          | +2y6  | 656.84  | 730.34  | 79    |
| 781 | CDH2  | P19022 | QLLIDPEDDVR          | +2y3  | 656.84  | 389.21  | 79    |
| 782 | CPE   | P16870 | SNAQGIDLNR           | +2y8  | 544.28  | 886.47  | 70.8  |
| 783 | CPE   | P16870 | SNAQGIDLNR           | +2y7  | 544.28  | 815.44  | 70.8  |
| 784 | CPE   | P16870 | SNAQGIDLNR           | +2y6  | 544.28  | 687.38  | 70.8  |
| 785 | CPE   | P16870 | SNAQGIDLNR           | +2y5  | 544.28  | 630.36  | 70.8  |
| 786 | CPE   | P16870 | SNAQGIDLNR           | +2y4  | 544.28  | 517.27  | 70.8  |
| 787 | CPE   | P16870 | TYWEDNK              | +2y5  | 478.21  | 691.30  | 66    |



|     |     |        |                  |       |         |         |       |
|-----|-----|--------|------------------|-------|---------|---------|-------|
| 788 | CPE | P16870 | TYWEDNK          | +2y4  | 478.21  | 505.23  | 66    |
| 789 | CPE | P16870 | TYWEDNK          | +2y3  | 478.21  | 376.18  | 66    |
| 790 | CPE | P16870 | LLIPGNYK         | +2y7  | 459.28  | 804.46  | 64.6  |
| 791 | CPE | P16870 | LLIPGNYK         | +2y6  | 459.28  | 691.38  | 64.6  |
| 792 | CPE | P16870 | LLIPGNYK         | +2y5  | 459.28  | 578.29  | 64.6  |
| 793 | CPE | P16870 | LLIPGNYK         | +2y4  | 459.28  | 481.24  | 64.6  |
| 794 | CPE | P16870 | LLIPGNYK         | +2y3  | 459.28  | 424.22  | 64.6  |
| 795 | CPE | P16870 | LTASAPGYLAITK    | +2y11 | 653.37  | 1091.61 | 78.7  |
| 796 | CPE | P16870 | LTASAPGYLAITK    | +2y10 | 653.37  | 1020.57 | 78.7  |
| 797 | CPE | P16870 | LTASAPGYLAITK    | +2y9  | 653.37  | 933.54  | 78.7  |
| 798 | CPE | P16870 | LTASAPGYLAITK    | +2y8  | 653.37  | 862.50  | 78.7  |
| 799 | CPE | P16870 | LTASAPGYLAITK    | +2y4  | 653.37  | 432.28  | 78.7  |
| 800 | CP  | P00450 | ALYLQYTDETFR     | +2y9  | 760.38  | 1172.56 | 86.5  |
| 801 | CP  | P00450 | ALYLQYTDETFR     | +2y8  | 760.38  | 1059.47 | 86.5  |
| 802 | CP  | P00450 | ALYLQYTDETFR     | +2y7  | 760.38  | 931.42  | 86.5  |
| 803 | CP  | P00450 | ALYLQYTDETFR     | +2y6  | 760.38  | 768.35  | 86.5  |
| 804 | CP  | P00450 | ALYLQYTDETFR     | +2y4  | 760.38  | 552.28  | 86.5  |
| 805 | CP  | P00450 | EYTDASFTNR       | +2y8  | 602.27  | 911.42  | 75    |
| 806 | CP  | P00450 | EYTDASFTNR       | +2y7  | 602.27  | 810.37  | 75    |
| 807 | CP  | P00450 | EYTDASFTNR       | +2y6  | 602.27  | 695.35  | 75    |
| 808 | CP  | P00450 | EYTDASFTNR       | +2y5  | 602.27  | 624.31  | 75    |
| 809 | CP  | P00450 | EYTDASFTNR       | +2y4  | 602.27  | 537.28  | 75    |
| 810 | CP  | P00450 | NNEGTYSPNYPQSR   | +2y10 | 952.41  | 1225.56 | 100.5 |
| 811 | CP  | P00450 | NNEGTYSPNYPQSR   | +2y9  | 952.41  | 1062.50 | 100.5 |
| 812 | CP  | P00450 | NNEGTYSPNYPQSR   | +2y8  | 952.41  | 975.46  | 100.5 |
| 813 | CP  | P00450 | NNEGTYSPNYPQSR   | +2y5  | 952.41  | 601.31  | 100.5 |
| 814 | CP  | P00450 | NNEGTYSPNYPQSR   | +2y4  | 952.41  | 487.26  | 100.5 |
| 815 | CP  | P00450 | EDEDFAQESNK      | +2y7  | 620.75  | 867.38  | 76.4  |
| 816 | CP  | P00450 | EDEDFAQESNK      | +2y6  | 620.75  | 752.36  | 76.4  |
| 817 | CP  | P00450 | EDEDFAQESNK      | +2y5  | 620.75  | 605.29  | 76.4  |
| 818 | CP  | P00450 | EDEDFAQESNK      | +2y4  | 620.75  | 477.23  | 76.4  |
| 819 | CP  | P00450 | EDEDFAQESNK      | +2y3  | 620.75  | 348.19  | 76.4  |
| 820 | CP  | P00450 | DDEEFIESNK       | +2y7  | 613.26  | 866.43  | 75.8  |
| 821 | CP  | P00450 | DDEEFIESNK       | +2y6  | 613.26  | 737.38  | 75.8  |
| 822 | CP  | P00450 | DDEEFIESNK       | +2y5  | 613.26  | 590.31  | 75.8  |
| 823 | CP  | P00450 | DDEEFIESNK       | +2y4  | 613.26  | 477.23  | 75.8  |
| 824 | CP  | P00450 | DDEEFIESNK       | +2y3  | 613.26  | 348.19  | 75.8  |
| 825 | C4B | P0C0L5 | VDFTLSSER        | +2y8  | 527.26  | 954.45  | 69.6  |
| 826 | C4B | P0C0L5 | VDFTLSSER        | +2y7  | 527.26  | 839.43  | 69.6  |
| 827 | C4B | P0C0L5 | VDFTLSSER        | +2y6  | 527.26  | 692.36  | 69.6  |
| 828 | C4B | P0C0L5 | VDFTLSSER        | +2y5  | 527.26  | 591.31  | 69.6  |
| 829 | C4B | P0C0L5 | VDFTLSSER        | +2y4  | 527.26  | 478.23  | 69.6  |
| 830 | C4B | P0C0L5 | TTNIQGINLLFSSR   | +2y10 | 782.43  | 1134.63 | 88.2  |
| 831 | C4B | P0C0L5 | TTNIQGINLLFSSR   | +2y9  | 782.43  | 1006.57 | 88.2  |
| 832 | C4B | P0C0L5 | TTNIQGINLLFSSR   | +2y7  | 782.43  | 836.46  | 88.2  |
| 833 | C4B | P0C0L5 | TTNIQGINLLFSSR   | +2y4  | 782.43  | 496.25  | 88.2  |
| 834 | C4B | P0C0L5 | TTNIQGINLLFSSR   | +2y3  | 782.43  | 349.18  | 88.2  |
| 835 | C4B | P0C0L5 | FEQLELRPVLYNYLDK | +2y11 | 1020.54 | 1393.78 | 105.5 |
| 836 | C4B | P0C0L5 | FEQLELRPVLYNYLDK | +2y9  | 1020.54 | 1124.60 | 105.5 |
| 837 | C4B | P0C0L5 | FEQLELRPVLYNYLDK | +2y7  | 1020.54 | 928.48  | 105.5 |

|     |          |        |                  |       |         |         |       |
|-----|----------|--------|------------------|-------|---------|---------|-------|
| 838 | C4B      | P0C0L5 | FEQLELRPVLYNYLDK | +2y6  | 1020.54 | 815.39  | 105.5 |
| 839 | C4B      | P0C0L5 | FEQLELRPVLYNYLDK | +2y5  | 1020.54 | 652.33  | 105.5 |
| 840 | C4B      | P0C0L5 | VLSLAQEQVGGGSPEK | +2y11 | 771.41  | 1129.55 | 87.4  |
| 841 | C4B      | P0C0L5 | VLSLAQEQVGGGSPEK | +2y10 | 771.41  | 1058.51 | 87.4  |
| 842 | C4B      | P0C0L5 | VLSLAQEQVGGGSPEK | +2y9  | 771.41  | 930.45  | 87.4  |
| 843 | C4B      | P0C0L5 | VLSLAQEQVGGGSPEK | +2y6  | 771.41  | 574.28  | 87.4  |
| 844 | C4B      | P0C0L5 | VLSLAQEQVGGGSPEK | +2y3  | 771.41  | 373.21  | 87.4  |
| 845 | C4B      | P0C0L5 | GLEEELQFSLGSK    | +2y8  | 718.87  | 879.49  | 83.5  |
| 846 | C4B      | P0C0L5 | GLEEELQFSLGSK    | +2y7  | 718.87  | 766.41  | 83.5  |
| 847 | C4B      | P0C0L5 | GLEEELQFSLGSK    | +2y6  | 718.87  | 638.35  | 83.5  |
| 848 | C4B      | P0C0L5 | GLEEELQFSLGSK    | +2y5  | 718.87  | 491.28  | 83.5  |
| 849 | C4B      | P0C0L5 | GLEEELQFSLGSK    | +2y4  | 718.87  | 404.25  | 83.5  |
| 850 | SERPINA6 | P08185 | GLASANVDFAFSLYK  | +2y10 | 801.91  | 1203.60 | 89.6  |
| 851 | SERPINA6 | P08185 | GLASANVDFAFSLYK  | +2y9  | 801.91  | 1089.56 | 89.6  |
| 852 | SERPINA6 | P08185 | GLASANVDFAFSLYK  | +2y8  | 801.91  | 990.49  | 89.6  |
| 853 | SERPINA6 | P08185 | GLASANVDFAFSLYK  | +2y7  | 801.91  | 875.47  | 89.6  |
| 854 | SERPINA6 | P08185 | GLASANVDFAFSLYK  | +2y4  | 801.91  | 510.29  | 89.6  |
| 855 | SERPINA6 | P08185 | GTWTQPFDLSTR     | +2y10 | 740.36  | 1135.57 | 85.1  |
| 856 | SERPINA6 | P08185 | GTWTQPFDLSTR     | +2y9  | 740.36  | 1034.53 | 85.1  |
| 857 | SERPINA6 | P08185 | GTWTQPFDLSTR     | +2y8  | 740.36  | 906.47  | 85.1  |
| 858 | SERPINA6 | P08185 | GTWTQPFDLSTR     | +2y5  | 740.36  | 547.32  | 85.1  |
| 859 | SERPINA6 | P08185 | GTWTQPFDLSTR     | +2y4  | 740.36  | 434.24  | 85.1  |
| 860 | SERPINA6 | P08185 | EENFYVDETTVVK    | +2y9  | 786.88  | 1053.55 | 88.5  |
| 861 | SERPINA6 | P08185 | EENFYVDETTVVK    | +2y8  | 786.88  | 890.48  | 88.5  |
| 862 | SERPINA6 | P08185 | EENFYVDETTVVK    | +2y7  | 786.88  | 791.41  | 88.5  |
| 863 | SERPINA6 | P08185 | EENFYVDETTVVK    | +2y6  | 786.88  | 676.39  | 88.5  |
| 864 | SERPINA6 | P08185 | EENFYVDETTVVK    | +2y3  | 786.88  | 345.25  | 88.5  |
| 865 | SERPINA6 | P08185 | WSAGLTSSQVDLYIPK | +2y11 | 882.96  | 1250.66 | 95.5  |
| 866 | SERPINA6 | P08185 | WSAGLTSSQVDLYIPK | +2y10 | 882.96  | 1149.62 | 95.5  |
| 867 | SERPINA6 | P08185 | WSAGLTSSQVDLYIPK | +2y7  | 882.96  | 847.49  | 95.5  |
| 868 | SERPINA6 | P08185 | WSAGLTSSQVDLYIPK | +2y6  | 882.96  | 748.42  | 95.5  |
| 869 | SERPINA6 | P08185 | WSAGLTSSQVDLYIPK | +2y3  | 882.96  | 357.25  | 95.5  |
| 870 | SERPINA6 | P08185 | ITQDAQLK         | +2y7  | 458.76  | 803.43  | 64.6  |
| 871 | SERPINA6 | P08185 | ITQDAQLK         | +2y6  | 458.76  | 702.38  | 64.6  |
| 872 | SERPINA6 | P08185 | ITQDAQLK         | +2y5  | 458.76  | 574.32  | 64.6  |
| 873 | SERPINA6 | P08185 | ITQDAQLK         | +2y3  | 458.76  | 388.26  | 64.6  |
| 874 | FGB      | P02675 | DNENVVNEYSSELEK  | +2y10 | 884.90  | 1197.56 | 95.6  |
| 875 | FGB      | P02675 | DNENVVNEYSSELEK  | +2y9  | 884.90  | 1098.49 | 95.6  |
| 876 | FGB      | P02675 | DNENVVNEYSSELEK  | +2y7  | 884.90  | 855.41  | 95.6  |
| 877 | FGB      | P02675 | DNENVVNEYSSELEK  | +2y6  | 884.90  | 692.35  | 95.6  |
| 878 | FGB      | P02675 | DNENVVNEYSSELEK  | +2y5  | 884.90  | 605.31  | 95.6  |
| 879 | FGB      | P02675 | QDGSVDFGR        | +2y8  | 490.73  | 852.38  | 66.9  |
| 880 | FGB      | P02675 | QDGSVDFGR        | +2y7  | 490.73  | 737.36  | 66.9  |
| 881 | FGB      | P02675 | QDGSVDFGR        | +2y5  | 490.73  | 593.30  | 66.9  |
| 882 | FGB      | P02675 | QDGSVDFGR        | +2y4  | 490.73  | 494.24  | 66.9  |
| 883 | FGB      | P02675 | QDGSVDFGR        | +2y3  | 490.73  | 379.21  | 66.9  |
| 884 | FGB      | P02675 | QGFGNVATNTDGK    | +2y7  | 654.81  | 706.34  | 78.9  |
| 885 | FGB      | P02675 | QGFGNVATNTDGK    | +2y6  | 654.81  | 635.30  | 78.9  |
| 886 | FGB      | P02675 | QGFGNVATNTDGK    | +2y5  | 654.81  | 534.25  | 78.9  |
| 887 | FGB      | P02675 | QGFGNVATNTDGK    | +2y4  | 654.81  | 420.21  | 78.9  |

|     |      |        |                      |       |         |         |       |
|-----|------|--------|----------------------|-------|---------|---------|-------|
| 888 | FGB  | P02675 | QGFGNVATNTDGK        | +2y3  | 654.81  | 319.16  | 78.9  |
| 889 | FGB  | P02675 | EDGGGWYNNR           | +2y8  | 620.26  | 995.45  | 76.3  |
| 890 | FGB  | P02675 | EDGGGWYNNR           | +2y6  | 620.26  | 881.41  | 76.3  |
| 891 | FGB  | P02675 | EDGGGWYNNR           | +2y5  | 620.26  | 824.38  | 76.3  |
| 892 | FGB  | P02675 | EDGGGWYNNR           | +2y4  | 620.26  | 638.30  | 76.3  |
| 893 | FGB  | P02675 | EDGGGWYNNR           | +2y3  | 620.26  | 452.23  | 76.3  |
| 894 | FGB  | P02675 | IRPFFPQQ             | +2y4  | 516.78  | 519.26  | 68.8  |
| 895 | FGB  | P02675 | IRPFFPQQ             | +2y3  | 516.78  | 372.19  | 68.8  |
| 896 | FN1  | P02751 | NTFAEVTGLSPGVTTYFK   | +2y12 | 997.50  | 1332.68 | 103.8 |
| 897 | FN1  | P02751 | NTFAEVTGLSPGVTTYFK   | +2y11 | 997.50  | 1231.64 | 103.8 |
| 898 | FN1  | P02751 | NTFAEVTGLSPGVTTYFK   | +2y9  | 997.50  | 1061.53 | 103.8 |
| 899 | FN1  | P02751 | NTFAEVTGLSPGVTTYFK   | +2y8  | 997.50  | 974.50  | 103.8 |
| 900 | FN1  | P02751 | NTFAEVTGLSPGVTTYFK   | +2y5  | 997.50  | 721.36  | 103.8 |
| 901 | FN1  | P02751 | LDAPTNLQFVNETDSTVLVR | +2y12 | 1116.58 | 1379.72 | 112.5 |
| 902 | FN1  | P02751 | LDAPTNLQFVNETDSTVLVR | +2y11 | 1116.58 | 1232.65 | 112.5 |
| 903 | FN1  | P02751 | LDAPTNLQFVNETDSTVLVR | +2y9  | 1116.58 | 1019.54 | 112.5 |
| 904 | FN1  | P02751 | LDAPTNLQFVNETDSTVLVR | +2y8  | 1116.58 | 890.49  | 112.5 |
| 905 | FN1  | P02751 | LDAPTNLQFVNETDSTVLVR | +2y6  | 1116.58 | 674.42  | 112.5 |
| 906 | FN1  | P02751 | VTDATETTITISWR       | +2y10 | 797.41  | 1207.63 | 89.2  |
| 907 | FN1  | P02751 | VTDATETTITISWR       | +2y8  | 797.41  | 977.54  | 89.2  |
| 908 | FN1  | P02751 | VTDATETTITISWR       | +2y7  | 797.41  | 876.49  | 89.2  |
| 909 | FN1  | P02751 | VTDATETTITISWR       | +2y4  | 797.41  | 561.31  | 89.2  |
| 910 | FN1  | P02751 | VTDATETTITISWR       | +2y3  | 797.41  | 448.23  | 89.2  |
| 911 | FN1  | P02751 | SSPVVIDASTAIDAPSNLR  | +2y9  | 957.00  | 956.52  | 100.9 |
| 912 | FN1  | P02751 | SSPVVIDASTAIDAPSNLR  | +2y8  | 957.00  | 885.48  | 100.9 |
| 913 | FN1  | P02751 | SSPVVIDASTAIDAPSNLR  | +2y7  | 957.00  | 772.39  | 100.9 |
| 914 | FN1  | P02751 | SSPVVIDASTAIDAPSNLR  | +2y6  | 957.00  | 657.37  | 100.9 |
| 915 | FN1  | P02751 | SSPVVIDASTAIDAPSNLR  | +2y5  | 957.00  | 586.33  | 100.9 |
| 916 | FN1  | P02751 | FLATTPNSLLVSWQPPR    | +2y12 | 964.03  | 1393.76 | 101.4 |
| 917 | FN1  | P02751 | FLATTPNSLLVSWQPPR    | +2y8  | 964.03  | 982.55  | 101.4 |
| 918 | FN1  | P02751 | FLATTPNSLLVSWQPPR    | +2y6  | 964.03  | 770.39  | 101.4 |
| 919 | FN1  | P02751 | FLATTPNSLLVSWQPPR    | +2y4  | 964.03  | 497.28  | 101.4 |
| 920 | FN1  | P02751 | FLATTPNSLLVSWQPPR    | +2y3  | 964.03  | 369.22  | 101.4 |
| 921 | ORM1 | P02763 | WFYIASAFR            | +2y8  | 580.80  | 974.51  | 73.5  |
| 922 | ORM1 | P02763 | WFYIASAFR            | +2y7  | 580.80  | 827.44  | 73.5  |
| 923 | ORM1 | P02763 | WFYIASAFR            | +2y6  | 580.80  | 664.38  | 73.5  |
| 924 | ORM1 | P02763 | WFYIASAFR            | +2y5  | 580.80  | 551.29  | 73.5  |
| 925 | ORM1 | P02763 | WFYIASAFR            | +2y4  | 580.80  | 480.26  | 73.5  |
| 926 | ORM1 | P02763 | SVQEIQATFFYFTPNK     | +2y11 | 960.48  | 1363.67 | 101.1 |
| 927 | ORM1 | P02763 | SVQEIQATFFYFTPNK     | +2y10 | 960.48  | 1235.61 | 101.1 |
| 928 | ORM1 | P02763 | SVQEIQATFFYFTPNK     | +2y8  | 960.48  | 1063.52 | 101.1 |
| 929 | ORM1 | P02763 | SVQEIQATFFYFTPNK     | +2y7  | 960.48  | 916.46  | 101.1 |
| 930 | ORM1 | P02763 | SVQEIQATFFYFTPNK     | +2y4  | 960.48  | 459.26  | 101.1 |
| 931 | ORM1 | P02763 | TEDTIFLR             | +2y7  | 497.76  | 893.47  | 67.4  |
| 932 | ORM1 | P02763 | TEDTIFLR             | +2y6  | 497.76  | 764.43  | 67.4  |
| 933 | ORM1 | P02763 | TEDTIFLR             | +2y5  | 497.76  | 649.40  | 67.4  |
| 934 | ORM1 | P02763 | TEDTIFLR             | +2y4  | 497.76  | 548.36  | 67.4  |
| 935 | ORM1 | P02763 | TEDTIFLR             | +2y3  | 497.76  | 435.27  | 67.4  |
| 936 | ORM1 | P02763 | NWGLSVYADKPETTK      | +2y11 | 854.93  | 1238.63 | 93.4  |
| 937 | ORM1 | P02763 | NWGLSVYADKPETTK      | +2y9  | 854.93  | 1052.53 | 93.4  |

|     |          |        |                 |       |        |         |      |
|-----|----------|--------|-----------------|-------|--------|---------|------|
| 938 | ORM1     | P02763 | NWGLSVYADKPETTK | +2y8  | 854.93 | 889.46  | 93.4 |
| 939 | ORM1     | P02763 | NWGLSVYADKPETTK | +2y6  | 854.93 | 703.40  | 93.4 |
| 940 | ORM1     | P02763 | NWGLSVYADKPETTK | +2y5  | 854.93 | 575.30  | 93.4 |
| 941 | ORM1     | P02763 | SDVVYTDWK       | +2y6  | 556.77 | 811.40  | 71.7 |
| 942 | ORM1     | P02763 | SDVVYTDWK       | +2y5  | 556.77 | 712.33  | 71.7 |
| 943 | ORM1     | P02763 | SDVVYTDWK       | +2y4  | 556.77 | 549.27  | 71.7 |
| 944 | ORM1     | P02763 | SDVVYTDWK       | +2y3  | 556.77 | 448.22  | 71.7 |
| 945 | ORM1     | P02763 | SDVVYTDWK       | +2y2  | 556.77 | 333.19  | 71.7 |
| 946 | SERPINA4 | P29622 | FYYLIASETPGK    | +2y8  | 694.86 | 802.43  | 81.8 |
| 947 | SERPINA4 | P29622 | FYYLIASETPGK    | +2y7  | 694.86 | 689.35  | 81.8 |
| 948 | SERPINA4 | P29622 | FYYLIASETPGK    | +2y6  | 694.86 | 618.31  | 81.8 |
| 949 | SERPINA4 | P29622 | FYYLIASETPGK    | +2y4  | 694.86 | 402.23  | 81.8 |
| 950 | SERPINA4 | P29622 | FYYLIASETPGK    | +2y3  | 694.86 | 301.19  | 81.8 |
| 951 | SERPINA4 | P29622 | DFYVDENTTVR     | +2y9  | 679.81 | 1096.53 | 80.7 |
| 952 | SERPINA4 | P29622 | DFYVDENTTVR     | +2y8  | 679.81 | 933.46  | 80.7 |
| 953 | SERPINA4 | P29622 | DFYVDENTTVR     | +2y7  | 679.81 | 834.40  | 80.7 |
| 954 | SERPINA4 | P29622 | DFYVDENTTVR     | +2y6  | 679.81 | 719.37  | 80.7 |
| 955 | SERPINA4 | P29622 | DFYVDENTTVR     | +2y5  | 679.81 | 590.33  | 80.7 |
| 956 | SERPINA4 | P29622 | GDATVFFILPNQGK  | +2y9  | 753.90 | 1063.59 | 86.1 |
| 957 | SERPINA4 | P29622 | GDATVFFILPNQGK  | +2y8  | 753.90 | 916.53  | 86.1 |
| 958 | SERPINA4 | P29622 | GDATVFFILPNQGK  | +2y7  | 753.90 | 769.46  | 86.1 |
| 959 | SERPINA4 | P29622 | GDATVFFILPNQGK  | +2y6  | 753.90 | 656.37  | 86.1 |
| 960 | SERPINA4 | P29622 | GDATVFFILPNQGK  | +2y5  | 753.90 | 543.29  | 86.1 |
| 961 | SERPINA4 | P29622 | FSISGSYVLDQILPR | +2y12 | 847.96 | 1347.73 | 92.9 |
| 962 | SERPINA4 | P29622 | FSISGSYVLDQILPR | +2y8  | 847.96 | 953.58  | 92.9 |
| 963 | SERPINA4 | P29622 | FSISGSYVLDQILPR | +2y7  | 847.96 | 854.51  | 92.9 |
| 964 | SERPINA4 | P29622 | FSISGSYVLDQILPR | +2y6  | 847.96 | 741.43  | 92.9 |
| 965 | SERPINA4 | P29622 | FSISGSYVLDQILPR | +2y3  | 847.96 | 385.26  | 92.9 |
| 966 | SERPINA4 | P29622 | LGFTDLFSK       | +2y8  | 514.28 | 914.46  | 68.6 |
| 967 | SERPINA4 | P29622 | LGFTDLFSK       | +2y7  | 514.28 | 857.44  | 68.6 |
| 968 | SERPINA4 | P29622 | LGFTDLFSK       | +2y6  | 514.28 | 710.37  | 68.6 |
| 969 | SERPINA4 | P29622 | LGFTDLFSK       | +2y5  | 514.28 | 609.32  | 68.6 |
| 970 | SERPINA4 | P29622 | LGFTDLFSK       | +2y3  | 514.28 | 381.21  | 68.6 |
| 971 | AMBP     | P02760 | ETLLQDFR        | +2y6  | 511.27 | 791.44  | 68.4 |
| 972 | AMBP     | P02760 | ETLLQDFR        | +2y5  | 511.27 | 678.36  | 68.4 |
| 973 | AMBP     | P02760 | ETLLQDFR        | +2y4  | 511.27 | 565.27  | 68.4 |
| 974 | AMBP     | P02760 | ETLLQDFR        | +2y3  | 511.27 | 437.21  | 68.4 |
| 975 | AMBP     | P02760 | ETLLQDFR        | +2y2  | 511.27 | 322.19  | 68.4 |
| 976 | AMBP     | P02760 | AFIQLWAFDAVK    | +2y8  | 704.88 | 949.51  | 82.5 |
| 977 | AMBP     | P02760 | AFIQLWAFDAVK    | +2y7  | 704.88 | 836.43  | 82.5 |
| 978 | AMBP     | P02760 | AFIQLWAFDAVK    | +2y6  | 704.88 | 650.35  | 82.5 |
| 979 | AMBP     | P02760 | AFIQLWAFDAVK    | +2y5  | 704.88 | 579.31  | 82.5 |
| 980 | AMBP     | P02760 | AFIQLWAFDAVK    | +2y4  | 704.88 | 432.25  | 82.5 |
| 981 | CLU      | P10909 | EIQNAVNGVK      | +2y8  | 536.29 | 829.45  | 70.2 |
| 982 | CLU      | P10909 | EIQNAVNGVK      | +2y7  | 536.29 | 701.39  | 70.2 |
| 983 | CLU      | P10909 | EIQNAVNGVK      | +2y6  | 536.29 | 587.35  | 70.2 |
| 984 | CLU      | P10909 | EIQNAVNGVK      | +2y5  | 536.29 | 516.31  | 70.2 |
| 985 | CLU      | P10909 | EIQNAVNGVK      | +2y4  | 536.29 | 417.25  | 70.2 |
| 986 | CLU      | P10909 | ASSIIDELFQDR    | +2y8  | 697.35 | 1035.51 | 82   |
| 987 | CLU      | P10909 | ASSIIDELFQDR    | +2y7  | 697.35 | 922.43  | 82   |

|      |          |        |                   |       |        |         |      |
|------|----------|--------|-------------------|-------|--------|---------|------|
| 988  | CLU      | P10909 | ASSIIDELFQDR      | +2y6  | 697.35 | 807.40  | 82   |
| 989  | CLU      | P10909 | ASSIIDELFQDR      | +2y5  | 697.35 | 678.36  | 82   |
| 990  | CLU      | P10909 | ASSIIDELFQDR      | +2y4  | 697.35 | 565.27  | 82   |
| 991  | CLU      | P10909 | ELDESLQVAER       | +2y9  | 644.82 | 1046.51 | 78.1 |
| 992  | CLU      | P10909 | ELDESLQVAER       | +2y7  | 644.82 | 802.44  | 78.1 |
| 993  | CLU      | P10909 | ELDESLQVAER       | +2y5  | 644.82 | 602.33  | 78.1 |
| 994  | CLU      | P10909 | ELDESLQVAER       | +2y4  | 644.82 | 474.27  | 78.1 |
| 995  | CLU      | P10909 | ELDESLQVAER       | +2y3  | 644.82 | 375.20  | 78.1 |
| 996  | CLU      | P10909 | LANLTQGEDQYYLR    | +2y10 | 842.42 | 1272.59 | 92.5 |
| 997  | CLU      | P10909 | LANLTQGEDQYYLR    | +2y9  | 842.42 | 1171.54 | 92.5 |
| 998  | CLU      | P10909 | LANLTQGEDQYYLR    | +2y8  | 842.42 | 1043.48 | 92.5 |
| 999  | CLU      | P10909 | LANLTQGEDQYYLR    | +2y6  | 842.42 | 857.42  | 92.5 |
| 1000 | CLU      | P10909 | LANLTQGEDQYYLR    | +2y5  | 842.42 | 742.39  | 92.5 |
| 1001 | CLU      | P10909 | LFDSDPITVTVPVEVSR | +2y12 | 937.50 | 1296.75 | 99.5 |
| 1002 | CLU      | P10909 | LFDSDPITVTVPVEVSR | +2y10 | 937.50 | 1086.62 | 99.5 |
| 1003 | CLU      | P10909 | LFDSDPITVTVPVEVSR | +2y9  | 937.50 | 985.57  | 99.5 |
| 1004 | CLU      | P10909 | LFDSDPITVTVPVEVSR | +2y8  | 937.50 | 886.50  | 99.5 |
| 1005 | CLU      | P10909 | LFDSDPITVTVPVEVSR | +2y6  | 937.50 | 686.38  | 99.5 |
| 1006 | CLEC3B   | E9PHK0 | NWETEITAQPDGGK    | +2y11 | 773.36 | 1116.55 | 87.5 |
| 1007 | CLEC3B   | E9PHK0 | NWETEITAQPDGGK    | +2y8  | 773.36 | 773.38  | 87.5 |
| 1008 | CLEC3B   | E9PHK0 | NWETEITAQPDGGK    | +2y7  | 773.36 | 672.33  | 87.5 |
| 1009 | CLEC3B   | E9PHK0 | NWETEITAQPDGGK    | +2y6  | 773.36 | 601.29  | 87.5 |
| 1010 | CLEC3B   | E9PHK0 | NWETEITAQPDGGK    | +2y5  | 773.36 | 473.24  | 87.5 |
| 1011 | ITIH4    | Q14624 | NGIDIYSLTVDSR     | +2y10 | 726.87 | 1168.58 | 84.1 |
| 1012 | ITIH4    | Q14624 | NGIDIYSLTVDSR     | +2y8  | 726.87 | 940.47  | 84.1 |
| 1013 | ITIH4    | Q14624 | NGIDIYSLTVDSR     | +2y7  | 726.87 | 777.41  | 84.1 |
| 1014 | ITIH4    | Q14624 | NGIDIYSLTVDSR     | +2y6  | 726.87 | 690.38  | 84.1 |
| 1015 | ITIH4    | Q14624 | NGIDIYSLTVDSR     | +2y5  | 726.87 | 577.29  | 84.1 |
| 1016 | ITIH4    | Q14624 | AEAQAQYSAAVAK     | +2y9  | 654.33 | 908.48  | 78.8 |
| 1017 | ITIH4    | Q14624 | AEAQAQYSAAVAK     | +2y8  | 654.33 | 837.45  | 78.8 |
| 1018 | ITIH4    | Q14624 | AEAQAQYSAAVAK     | +2y7  | 654.33 | 709.39  | 78.8 |
| 1019 | ITIH4    | Q14624 | AEAQAQYSAAVAK     | +2y6  | 654.33 | 546.32  | 78.8 |
| 1020 | ITIH4    | Q14624 | AEAQAQYSAAVAK     | +2y4  | 654.33 | 388.26  | 78.8 |
| 1021 | ITIH4    | Q14624 | ITFELVYEELLK      | +2y10 | 748.92 | 1282.69 | 85.7 |
| 1022 | ITIH4    | Q14624 | ITFELVYEELLK      | +2y8  | 748.92 | 1006.58 | 85.7 |
| 1023 | ITIH4    | Q14624 | ITFELVYEELLK      | +2y7  | 748.92 | 893.50  | 85.7 |
| 1024 | ITIH4    | Q14624 | ITFELVYEELLK      | +2y6  | 748.92 | 794.43  | 85.7 |
| 1025 | ITIH4    | Q14624 | ITFELVYEELLK      | +2y5  | 748.92 | 631.37  | 85.7 |
| 1026 | ITIH4    | Q14624 | GPDVLTATVSGK      | +2y9  | 572.81 | 875.52  | 72.9 |
| 1027 | ITIH4    | Q14624 | GPDVLTATVSGK      | +2y8  | 572.81 | 776.45  | 72.9 |
| 1028 | ITIH4    | Q14624 | GPDVLTATVSGK      | +2y7  | 572.81 | 663.37  | 72.9 |
| 1029 | ITIH4    | Q14624 | GPDVLTATVSGK      | +2y6  | 572.81 | 562.32  | 72.9 |
| 1030 | ITIH4    | Q14624 | GPDVLTATVSGK      | +2y5  | 572.81 | 491.28  | 72.9 |
| 1031 | ITIH4    | Q14624 | AGFSWIEVTFK       | +2y8  | 642.83 | 1009.54 | 78   |
| 1032 | ITIH4    | Q14624 | AGFSWIEVTFK       | +2y7  | 642.83 | 922.50  | 78   |
| 1033 | ITIH4    | Q14624 | AGFSWIEVTFK       | +2y6  | 642.83 | 736.42  | 78   |
| 1034 | ITIH4    | Q14624 | AGFSWIEVTFK       | +2y5  | 642.83 | 623.34  | 78   |
| 1035 | ITIH4    | Q14624 | AGFSWIEVTFK       | +2y3  | 642.83 | 395.23  | 78   |
| 1036 | LGALS3BP | Q08380 | ALGFENATQALGR     | +2y11 | 674.35 | 1163.58 | 80.3 |
| 1037 | LGALS3BP | Q08380 | ALGFENATQALGR     | +2y7  | 674.35 | 716.40  | 80.3 |

|      |          |        |                     |       |         |         |      |
|------|----------|--------|---------------------|-------|---------|---------|------|
| 1038 | LGALS3BP | Q08380 | ALGFENATQALGR       | +2y6  | 674.35  | 645.37  | 80.3 |
| 1039 | LGALS3BP | Q08380 | ALGFENATQALGR       | +2y5  | 674.35  | 544.32  | 80.3 |
| 1040 | LGALS3BP | Q08380 | ALGFENATQALGR       | +2y4  | 674.35  | 416.26  | 80.3 |
| 1041 | LGALS3BP | Q08380 | ELSEALGQIFDSQR      | +2y9  | 796.90  | 1063.55 | 89.2 |
| 1042 | LGALS3BP | Q08380 | ELSEALGQIFDSQR      | +2y8  | 796.90  | 950.47  | 89.2 |
| 1043 | LGALS3BP | Q08380 | ELSEALGQIFDSQR      | +2y6  | 796.90  | 765.39  | 89.2 |
| 1044 | LGALS3BP | Q08380 | ELSEALGQIFDSQR      | +2y5  | 796.90  | 652.30  | 89.2 |
| 1045 | LGALS3BP | Q08380 | ELSEALGQIFDSQR      | +2y3  | 796.90  | 390.21  | 89.2 |
| 1046 | LGALS3BP | Q08380 | SDLAVPSELALLK       | +2y9  | 678.39  | 969.60  | 80.6 |
| 1047 | LGALS3BP | Q08380 | SDLAVPSELALLK       | +2y8  | 678.39  | 870.53  | 80.6 |
| 1048 | LGALS3BP | Q08380 | SDLAVPSELALLK       | +2y5  | 678.39  | 557.40  | 80.6 |
| 1049 | LGALS3BP | Q08380 | SDLAVPSELALLK       | +2y4  | 678.39  | 444.32  | 80.6 |
| 1050 | LGALS3BP | Q08380 | SDLAVPSELALLK       | +2y3  | 678.39  | 373.28  | 80.6 |
| 1051 | LGALS3BP | Q08380 | GLNLTEDTYKPR        | +2y8  | 703.87  | 1009.49 | 82.4 |
| 1052 | LGALS3BP | Q08380 | GLNLTEDTYKPR        | +2y7  | 703.87  | 908.45  | 82.4 |
| 1053 | LGALS3BP | Q08380 | GLNLTEDTYKPR        | +2y6  | 703.87  | 779.40  | 82.4 |
| 1054 | LGALS3BP | Q08380 | GLNLTEDTYKPR        | +2y5  | 703.87  | 664.38  | 82.4 |
| 1055 | LGALS3BP | Q08380 | GLNLTEDTYKPR        | +2y4  | 703.87  | 563.33  | 82.4 |
| 1056 | LGALS3BP | Q08380 | IYTSPTWSAFVTDSSWSAR | +2y12 | 1081.51 | 1313.61 | 110  |
| 1057 | LGALS3BP | Q08380 | IYTSPTWSAFVTDSSWSAR | +2y10 | 1081.51 | 1155.54 | 110  |
| 1058 | LGALS3BP | Q08380 | IYTSPTWSAFVTDSSWSAR | +2y9  | 1081.51 | 1008.47 | 110  |
| 1059 | LGALS3BP | Q08380 | IYTSPTWSAFVTDSSWSAR | +2y8  | 1081.51 | 909.41  | 110  |
| 1060 | LGALS3BP | Q08380 | IYTSPTWSAFVTDSSWSAR | +2y6  | 1081.51 | 693.33  | 110  |
| 1061 | ENPP2    | Q13822 | WWGGQPLWITATK       | +2y11 | 772.41  | 1171.65 | 87.4 |
| 1062 | ENPP2    | Q13822 | WWGGQPLWITATK       | +2y8  | 772.41  | 929.55  | 87.4 |
| 1063 | ENPP2    | Q13822 | WWGGQPLWITATK       | +2y6  | 772.41  | 719.41  | 87.4 |
| 1064 | ENPP2    | Q13822 | WWGGQPLWITATK       | +2y5  | 772.41  | 533.33  | 87.4 |
| 1065 | ENPP2    | Q13822 | WWGGQPLWITATK       | +2y4  | 772.41  | 420.25  | 87.4 |
| 1066 | ENPP2    | Q13822 | VWNYFQR             | +2y6  | 506.75  | 913.43  | 68.1 |
| 1067 | ENPP2    | Q13822 | VWNYFQR             | +2y5  | 506.75  | 727.35  | 68.1 |
| 1068 | ENPP2    | Q13822 | VWNYFQR             | +2y4  | 506.75  | 613.31  | 68.1 |
| 1069 | ENPP2    | Q13822 | VWNYFQR             | +2y3  | 506.75  | 450.25  | 68.1 |
| 1070 | SERPINA5 | P05154 | TLYLADTFPTNFR       | +2y9  | 779.90  | 1068.51 | 88   |
| 1071 | SERPINA5 | P05154 | TLYLADTFPTNFR       | +2y8  | 779.90  | 997.47  | 88   |
| 1072 | SERPINA5 | P05154 | TLYLADTFPTNFR       | +2y7  | 779.90  | 882.45  | 88   |
| 1073 | SERPINA5 | P05154 | TLYLADTFPTNFR       | +2y6  | 779.90  | 781.40  | 88   |
| 1074 | SERPINA5 | P05154 | TLYLADTFPTNFR       | +2y5  | 779.90  | 634.33  | 88   |
| 1075 | SERPINA5 | P05154 | GTQEQDFYVTSETVVR    | +2y10 | 929.94  | 1200.63 | 98.9 |
| 1076 | SERPINA5 | P05154 | GTQEQDFYVTSETVVR    | +2y9  | 929.94  | 1053.56 | 98.9 |
| 1077 | SERPINA5 | P05154 | GTQEQDFYVTSETVVR    | +2y8  | 929.94  | 890.49  | 98.9 |
| 1078 | SERPINA5 | P05154 | GTQEQDFYVTSETVVR    | +2y7  | 929.94  | 791.43  | 98.9 |
| 1079 | SERPINA5 | P05154 | GTQEQDFYVTSETVVR    | +2y6  | 929.94  | 690.38  | 98.9 |
| 1080 | SERPINA5 | P05154 | QLELYLPK            | +2y6  | 502.29  | 762.44  | 67.7 |
| 1081 | SERPINA5 | P05154 | QLELYLPK            | +2y5  | 502.29  | 633.40  | 67.7 |
| 1082 | SERPINA5 | P05154 | QLELYLPK            | +2y4  | 502.29  | 520.31  | 67.7 |
| 1083 | SERPINA5 | P05154 | QLELYLPK            | +2y3  | 502.29  | 357.25  | 67.7 |
| 1084 | SERPINA5 | P05154 | FSIEGSYQLEK         | +2y9  | 650.82  | 1066.54 | 78.6 |
| 1085 | SERPINA5 | P05154 | FSIEGSYQLEK         | +2y8  | 650.82  | 953.46  | 78.6 |
| 1086 | SERPINA5 | P05154 | FSIEGSYQLEK         | +2y7  | 650.82  | 824.41  | 78.6 |
| 1087 | SERPINA5 | P05154 | FSIEGSYQLEK         | +2y6  | 650.82  | 767.39  | 78.6 |

|      |          |        |                    |       |        |         |       |
|------|----------|--------|--------------------|-------|--------|---------|-------|
| 1088 | SERPINA5 | P05154 | FSIEGSYQLEK        | +2y5  | 650.82 | 680.36  | 78.6  |
| 1089 | SERPINA5 | P05154 | AAAATGTIFTFR       | +2y8  | 613.83 | 942.50  | 75.9  |
| 1090 | SERPINA5 | P05154 | AAAATGTIFTFR       | +2y7  | 613.83 | 841.46  | 75.9  |
| 1091 | SERPINA5 | P05154 | AAAATGTIFTFR       | +2y4  | 613.83 | 570.30  | 75.9  |
| 1092 | CST3     | P01034 | ALDFAVGEYNK        | +2y9  | 613.81 | 1042.48 | 75.9  |
| 1093 | CST3     | P01034 | ALDFAVGEYNK        | +2y7  | 613.81 | 780.39  | 75.9  |
| 1094 | CST3     | P01034 | ALDFAVGEYNK        | +2y6  | 613.81 | 709.35  | 75.9  |
| 1095 | CST3     | P01034 | ALDFAVGEYNK        | +2y5  | 613.81 | 610.28  | 75.9  |
| 1096 | CST3     | P01034 | ALDFAVGEYNK        | +2y3  | 613.81 | 424.22  | 75.9  |
| 1097 | CST3     | P01034 | QIVAGVNYFLDVELGR   | +2y12 | 896.98 | 1381.71 | 96.5  |
| 1098 | CST3     | P01034 | QIVAGVNYFLDVELGR   | +2y10 | 896.98 | 1225.62 | 96.5  |
| 1099 | CST3     | P01034 | QIVAGVNYFLDVELGR   | +2y9  | 896.98 | 1111.58 | 96.5  |
| 1100 | CST3     | P01034 | QIVAGVNYFLDVELGR   | +2y8  | 896.98 | 948.51  | 96.5  |
| 1101 | CST3     | P01034 | QIVAGVNYFLDVELGR   | +2y6  | 896.98 | 688.36  | 96.5  |
| 1102 | OPTC     | Q9UBM4 | EGDSFEVLPLR        | +2y7  | 631.32 | 873.52  | 77.1  |
| 1103 | OPTC     | Q9UBM4 | EGDSFEVLPLR        | +2y6  | 631.32 | 726.45  | 77.1  |
| 1104 | OPTC     | Q9UBM4 | EGDSFEVLPLR        | +2y5  | 631.32 | 597.41  | 77.1  |
| 1105 | OPTC     | Q9UBM4 | EGDSFEVLPLR        | +2y4  | 631.32 | 498.34  | 77.1  |
| 1106 | OPTC     | Q9UBM4 | EGDSFEVLPLR        | +2y3  | 631.32 | 385.26  | 77.1  |
| 1107 | DKK3     | Q9UBP4 | LLDLITWELEPDGALDR  | +2y11 | 985.02 | 1300.62 | 102.9 |
| 1108 | DKK3     | Q9UBP4 | LLDLITWELEPDGALDR  | +2y10 | 985.02 | 1114.54 | 102.9 |
| 1109 | DKK3     | Q9UBP4 | LLDLITWELEPDGALDR  | +2y8  | 985.02 | 872.41  | 102.9 |
| 1110 | DKK3     | Q9UBP4 | LLDLITWELEPDGALDR  | +2y7  | 985.02 | 743.37  | 102.9 |
| 1111 | DKK3     | Q9UBP4 | LLDLITWELEPDGALDR  | +2y5  | 985.02 | 531.29  | 102.9 |
| 1112 | DKK3     | Q9UBP4 | DQDGEILLPR         | +2y8  | 578.30 | 912.51  | 73.3  |
| 1113 | DKK3     | Q9UBP4 | DQDGEILLPR         | +2y7  | 578.30 | 797.49  | 73.3  |
| 1114 | DKK3     | Q9UBP4 | DQDGEILLPR         | +2y5  | 578.30 | 611.42  | 73.3  |
| 1115 | DKK3     | Q9UBP4 | DQDGEILLPR         | +2y4  | 578.30 | 498.34  | 73.3  |
| 1116 | DKK3     | Q9UBP4 | DQDGEILLPR         | +2y3  | 578.30 | 385.26  | 73.3  |
| 1117 | DKK3     | Q9UBP4 | QELEDLER           | +2y6  | 516.25 | 774.40  | 68.8  |
| 1118 | DKK3     | Q9UBP4 | QELEDLER           | +2y5  | 516.25 | 661.32  | 68.8  |
| 1119 | DKK3     | Q9UBP4 | QELEDLER           | +2y4  | 516.25 | 532.27  | 68.8  |
| 1120 | DKK3     | Q9UBP4 | QELEDLER           | +2y3  | 516.25 | 417.25  | 68.8  |
| 1121 | DKK3     | Q9UBP4 | QELEDLER           | +2y2  | 516.25 | 304.16  | 68.8  |
| 1122 | DKK3     | Q9UBP4 | EPAAAAAALLGGEEI    | +2y11 | 691.86 | 1014.55 | 81.6  |
| 1123 | DKK3     | Q9UBP4 | EPAAAAAALLGGEEI    | +2y8  | 691.86 | 801.44  | 81.6  |
| 1124 | DKK3     | Q9UBP4 | EPAAAAAALLGGEEI    | +2y7  | 691.86 | 730.40  | 81.6  |
| 1125 | DKK3     | Q9UBP4 | EPAAAAAALLGGEEI    | +2y6  | 691.86 | 617.31  | 81.6  |
| 1126 | DKK3     | Q9UBP4 | EPAAAAAALLGGEEI    | +2y5  | 691.86 | 504.23  | 81.6  |
| 1127 | TPP1     | O14773 | ADPEEELSLTFALR     | +2y9  | 795.90 | 1049.60 | 89.1  |
| 1128 | TPP1     | O14773 | ADPEEELSLTFALR     | +2y8  | 795.90 | 920.56  | 89.1  |
| 1129 | TPP1     | O14773 | ADPEEELSLTFALR     | +2y6  | 795.90 | 720.44  | 89.1  |
| 1130 | TPP1     | O14773 | ADPEEELSLTFALR     | +2y5  | 795.90 | 607.36  | 89.1  |
| 1131 | TPP1     | O14773 | ADPEEELSLTFALR     | +2y4  | 795.90 | 506.31  | 89.1  |
| 1132 | TPP1     | O14773 | LSELVQAVSDPSSPQYGK | +2y11 | 952.98 | 1164.55 | 100.6 |
| 1133 | TPP1     | O14773 | LSELVQAVSDPSSPQYGK | +2y10 | 952.98 | 1065.48 | 100.6 |
| 1134 | TPP1     | O14773 | LSELVQAVSDPSSPQYGK | +2y9  | 952.98 | 978.45  | 100.6 |
| 1135 | TPP1     | O14773 | LSELVQAVSDPSSPQYGK | +2y8  | 952.98 | 863.43  | 100.6 |
| 1136 | TPP1     | O14773 | LSELVQAVSDPSSPQYGK | +2y5  | 952.98 | 592.31  | 100.6 |
| 1137 | TPP1     | O14773 | AYPDVAALSDGYWVVSNR | +2y10 | 991.98 | 1182.55 | 103.4 |

|      |        |        |                    |       |        |         |       |
|------|--------|--------|--------------------|-------|--------|---------|-------|
| 1138 | TPP1   | O14773 | AYPDVAALSDGYWVVSNR | +2y9  | 991.98 | 1095.52 | 103.4 |
| 1139 | TPP1   | O14773 | AYPDVAALSDGYWVVSNR | +2y8  | 991.98 | 980.49  | 103.4 |
| 1140 | TPP1   | O14773 | AYPDVAALSDGYWVVSNR | +2y6  | 991.98 | 760.41  | 103.4 |
| 1141 | TPP1   | O14773 | AYPDVAALSDGYWVVSNR | +2y4  | 991.98 | 475.26  | 103.4 |
| 1142 | TPP1   | O14773 | ILSGRPPLGFLNPR     | +2y9  | 768.95 | 1010.58 | 87.2  |
| 1143 | TPP1   | O14773 | ILSGRPPLGFLNPR     | +2y8  | 768.95 | 913.53  | 87.2  |
| 1144 | TPP1   | O14773 | ILSGRPPLGFLNPR     | +2y6  | 768.95 | 703.39  | 87.2  |
| 1145 | TPP1   | O14773 | ILSGRPPLGFLNPR     | +2y5  | 768.95 | 646.37  | 87.2  |
| 1146 | TPP1   | O14773 | ILSGRPPLGFLNPR     | +2y4  | 768.95 | 499.30  | 87.2  |
| 1147 | ABI3BP | Q7Z7G0 | FTEAIVDAEPK        | +2y9  | 610.31 | 971.50  | 75.6  |
| 1148 | ABI3BP | Q7Z7G0 | FTEAIVDAEPK        | +2y8  | 610.31 | 842.46  | 75.6  |
| 1149 | ABI3BP | Q7Z7G0 | FTEAIVDAEPK        | +2y7  | 610.31 | 771.42  | 75.6  |
| 1150 | ABI3BP | Q7Z7G0 | FTEAIVDAEPK        | +2y6  | 610.31 | 658.34  | 75.6  |
| 1151 | ABI3BP | Q7Z7G0 | FTEAIVDAEPK        | +2y5  | 610.31 | 559.27  | 75.6  |
| 1152 | ABI3BP | Q7Z7G0 | YLIVVRPAPPPSQK     | +2y11 | 782.96 | 1175.69 | 88.2  |
| 1153 | ABI3BP | Q7Z7G0 | YLIVVRPAPPPSQK     | +2y10 | 782.96 | 1076.62 | 88.2  |
| 1154 | ABI3BP | Q7Z7G0 | YLIVVRPAPPPSQK     | +2y9  | 782.96 | 977.55  | 88.2  |
| 1155 | ABI3BP | Q7Z7G0 | YLIVVRPAPPPSQK     | +2y8  | 782.96 | 821.45  | 88.2  |
| 1156 | ABI3BP | Q7Z7G0 | YLIVVRPAPPPSQK     | +2y6  | 782.96 | 653.36  | 88.2  |
| 1157 | ABI3BP | Q7Z7G0 | DNVEGGIWSK         | +2y8  | 552.77 | 875.46  | 71.4  |
| 1158 | ABI3BP | Q7Z7G0 | DNVEGGIWSK         | +2y7  | 552.77 | 776.39  | 71.4  |
| 1159 | ABI3BP | Q7Z7G0 | DNVEGGIWSK         | +2y6  | 552.77 | 647.35  | 71.4  |
| 1160 | ABI3BP | Q7Z7G0 | DNVEGGIWSK         | +2y5  | 552.77 | 590.33  | 71.4  |
| 1161 | ABI3BP | Q7Z7G0 | DNVEGGIWSK         | +2y3  | 552.77 | 420.22  | 71.4  |
| 1162 | ABI3BP | Q7Z7G0 | FYNIGDQR           | +2y6  | 506.75 | 702.35  | 68.1  |
| 1163 | ABI3BP | Q7Z7G0 | FYNIGDQR           | +2y5  | 506.75 | 588.31  | 68.1  |
| 1164 | ABI3BP | Q7Z7G0 | FYNIGDQR           | +2y4  | 506.75 | 475.23  | 68.1  |
| 1165 | ABI3BP | Q7Z7G0 | FYNIGDQR           | +2y3  | 506.75 | 418.20  | 68.1  |
| 1166 | ABI3BP | Q7Z7G0 | FYNIGDQR           | +2y2  | 506.75 | 303.18  | 68.1  |
| 1167 | ABI3BP | Q7Z7G0 | TGQQLTSDQLPIK      | +2y10 | 714.89 | 1142.64 | 83.2  |
| 1168 | ABI3BP | Q7Z7G0 | TGQQLTSDQLPIK      | +2y9  | 714.89 | 1014.58 | 83.2  |
| 1169 | ABI3BP | Q7Z7G0 | TGQQLTSDQLPIK      | +2y8  | 714.89 | 901.50  | 83.2  |
| 1170 | ABI3BP | Q7Z7G0 | TGQQLTSDQLPIK      | +2y7  | 714.89 | 800.45  | 83.2  |
| 1171 | ABI3BP | Q7Z7G0 | TGQQLTSDQLPIK      | +2y3  | 714.89 | 357.25  | 83.2  |
| 1172 | LRG1   | P02750 | GPLQLER            | +2y5  | 406.73 | 658.39  | 60.8  |
| 1173 | LRG1   | P02750 | GPLQLER            | +2y4  | 406.73 | 545.30  | 60.8  |
| 1174 | LRG1   | P02750 | GPLQLER            | +2y3  | 406.73 | 417.25  | 60.8  |
| 1175 | LRG1   | P02750 | GPLQLER            | +2y2  | 406.73 | 304.16  | 60.8  |
| 1176 | LRG1   | P02750 | DLLLPQPDLR         | +2y8  | 590.34 | 951.56  | 74.2  |
| 1177 | LRG1   | P02750 | DLLLPQPDLR         | +2y7  | 590.34 | 838.48  | 74.2  |
| 1178 | LRG1   | P02750 | DLLLPQPDLR         | +2y6  | 590.34 | 725.39  | 74.2  |
| 1179 | LRG1   | P02750 | DLLLPQPDLR         | +2y5  | 590.34 | 628.34  | 74.2  |
| 1180 | LRG1   | P02750 | DLLLPQPDLR         | +2y4  | 590.34 | 500.28  | 74.2  |
| 1181 | LRG1   | P02750 | YLFLNGNK           | +2y7  | 484.76 | 805.46  | 66.5  |
| 1182 | LRG1   | P02750 | YLFLNGNK           | +2y6  | 484.76 | 692.37  | 66.5  |
| 1183 | LRG1   | P02750 | YLFLNGNK           | +2y5  | 484.76 | 545.30  | 66.5  |
| 1184 | LRG1   | P02750 | YLFLNGNK           | +2y4  | 484.76 | 432.22  | 66.5  |
| 1185 | LRG1   | P02750 | YLFLNGNK           | +2y3  | 484.76 | 318.18  | 66.5  |
| 1186 | LRG1   | P02750 | VAAGAFQGLR         | +2y9  | 495.28 | 890.48  | 67.2  |
| 1187 | LRG1   | P02750 | VAAGAFQGLR         | +2y8  | 495.28 | 819.45  | 67.2  |



|      |       |        |                  |       |        |         |      |
|------|-------|--------|------------------|-------|--------|---------|------|
| 1188 | LRG1  | P02750 | VAAGAFQGLR       | +2y7  | 495.28 | 748.41  | 67.2 |
| 1189 | LRG1  | P02750 | VAAGAFQGLR       | +2y5  | 495.28 | 620.35  | 67.2 |
| 1190 | LRG1  | P02750 | VAAGAFQGLR       | +2y3  | 495.28 | 345.22  | 67.2 |
| 1191 | LRG1  | P02750 | GQTLLAVAK        | +2y7  | 450.78 | 715.47  | 64   |
| 1192 | LRG1  | P02750 | GQTLLAVAK        | +2y6  | 450.78 | 614.42  | 64   |
| 1193 | LRG1  | P02750 | GQTLLAVAK        | +2y5  | 450.78 | 501.34  | 64   |
| 1194 | LRG1  | P02750 | GQTLLAVAK        | +2y4  | 450.78 | 388.26  | 64   |
| 1195 | LRG1  | P02750 | GQTLLAVAK        | +2y3  | 450.78 | 317.22  | 64   |
| 1196 | SPON1 | Q9HCB6 | EGYTEFSLR        | +2y7  | 551.26 | 915.46  | 71.3 |
| 1197 | SPON1 | Q9HCB6 | EGYTEFSLR        | +2y6  | 551.26 | 752.39  | 71.3 |
| 1198 | SPON1 | Q9HCB6 | EGYTEFSLR        | +2y5  | 551.26 | 651.35  | 71.3 |
| 1199 | SPON1 | Q9HCB6 | EGYTEFSLR        | +2y4  | 551.26 | 522.30  | 71.3 |
| 1200 | SPON1 | Q9HCB6 | EGYTEFSLR        | +2y3  | 551.26 | 375.24  | 71.3 |
| 1201 | SPON1 | Q9HCB6 | GFTLIALR         | +2y6  | 445.78 | 686.46  | 63.6 |
| 1202 | SPON1 | Q9HCB6 | GFTLIALR         | +2y5  | 445.78 | 585.41  | 63.6 |
| 1203 | SPON1 | Q9HCB6 | GFTLIALR         | +2y4  | 445.78 | 472.32  | 63.6 |
| 1204 | SPON1 | Q9HCB6 | GFTLIALR         | +2y3  | 445.78 | 359.24  | 63.6 |
| 1205 | SPON1 | Q9HCB6 | IIFYQDEGSLTK     | +2y10 | 707.37 | 1187.56 | 82.7 |
| 1206 | SPON1 | Q9HCB6 | IIFYQDEGSLTK     | +2y9  | 707.37 | 1024.49 | 82.7 |
| 1207 | SPON1 | Q9HCB6 | IIFYQDEGSLTK     | +2y8  | 707.37 | 877.43  | 82.7 |
| 1208 | SPON1 | Q9HCB6 | IIFYQDEGSLTK     | +2y7  | 707.37 | 749.37  | 82.7 |
| 1209 | SPON1 | Q9HCB6 | IIFYQDEGSLTK     | +2y6  | 707.37 | 634.34  | 82.7 |
| 1210 | SPON1 | Q9HCB6 | NYVLWEYGGYASEGVK | +2y12 | 917.94 | 1345.61 | 98   |
| 1211 | SPON1 | Q9HCB6 | NYVLWEYGGYASEGVK | +2y11 | 917.94 | 1159.53 | 98   |
| 1212 | SPON1 | Q9HCB6 | NYVLWEYGGYASEGVK | +2y10 | 917.94 | 1030.48 | 98   |
| 1213 | SPON1 | Q9HCB6 | NYVLWEYGGYASEGVK | +2y9  | 917.94 | 867.42  | 98   |
| 1214 | SPON1 | Q9HCB6 | NYVLWEYGGYASEGVK | +2y8  | 917.94 | 810.40  | 98   |
| 1215 | SPON1 | Q9HCB6 | AQWPAWQPLNVR     | +2y10 | 733.39 | 1266.67 | 84.6 |
| 1216 | SPON1 | Q9HCB6 | AQWPAWQPLNVR     | +2y9  | 733.39 | 1080.59 | 84.6 |
| 1217 | SPON1 | Q9HCB6 | AQWPAWQPLNVR     | +2y7  | 733.39 | 912.51  | 84.6 |
| 1218 | SPON1 | Q9HCB6 | AQWPAWQPLNVR     | +2y6  | 733.39 | 726.43  | 84.6 |
| 1219 | SPON1 | Q9HCB6 | AQWPAWQPLNVR     | +2y5  | 733.39 | 598.37  | 84.6 |
| 1220 | IGHA1 | P01876 | DASGVFTFTWPSSGK  | +2y10 | 770.87 | 1111.54 | 87.3 |
| 1221 | IGHA1 | P01876 | DASGVFTFTWPSSGK  | +2y8  | 770.87 | 863.43  | 87.3 |
| 1222 | IGHA1 | P01876 | DASGVFTFTWPSSGK  | +2y7  | 770.87 | 762.38  | 87.3 |
| 1223 | IGHA1 | P01876 | DASGVFTFTWPSSGK  | +2y6  | 770.87 | 576.30  | 87.3 |
| 1224 | IGHA1 | P01876 | DASGVFTFTWPSSGK  | +2y5  | 770.87 | 475.25  | 87.3 |
| 1225 | IGHA1 | P01876 | TPLTATLSK        | +2y7  | 466.28 | 733.45  | 65.1 |
| 1226 | IGHA1 | P01876 | TPLTATLSK        | +2y6  | 466.28 | 620.36  | 65.1 |
| 1227 | IGHA1 | P01876 | TPLTATLSK        | +2y5  | 466.28 | 519.31  | 65.1 |
| 1228 | IGHA1 | P01876 | TPLTATLSK        | +2y4  | 466.28 | 448.28  | 65.1 |
| 1229 | IGHA1 | P01876 | TPLTATLSK        | +2y3  | 466.28 | 347.23  | 65.1 |
| 1230 | IGHA1 | P01876 | WLQGSQELPR       | +2y9  | 607.32 | 1027.55 | 75.4 |
| 1231 | IGHA1 | P01876 | WLQGSQELPR       | +2y8  | 607.32 | 914.47  | 75.4 |
| 1232 | IGHA1 | P01876 | WLQGSQELPR       | +2y7  | 607.32 | 786.41  | 75.4 |
| 1233 | IGHA1 | P01876 | WLQGSQELPR       | +2y4  | 607.32 | 514.30  | 75.4 |
| 1234 | IGHA1 | P01876 | WLQGSQELPR       | +2y3  | 607.32 | 385.26  | 75.4 |
| 1235 | IGHA1 | P01876 | YLTWASR          | +2y6  | 448.73 | 733.40  | 63.8 |
| 1236 | IGHA1 | P01876 | YLTWASR          | +2y5  | 448.73 | 620.32  | 63.8 |
| 1237 | IGHA1 | P01876 | YLTWASR          | +2y4  | 448.73 | 519.27  | 63.8 |

|      |       |        |                     |       |         |         |      |
|------|-------|--------|---------------------|-------|---------|---------|------|
| 1238 | IGHA1 | P01876 | YLTWASR             | +2y3  | 448.73  | 333.19  | 63.8 |
| 1239 | IGHA1 | P01876 | QEPSQGTTFFAVTSILR   | +2y12 | 918.48  | 1266.71 | 98.1 |
| 1240 | IGHA1 | P01876 | QEPSQGTTFFAVTSILR   | +2y10 | 918.48  | 1108.64 | 98.1 |
| 1241 | IGHA1 | P01876 | QEPSQGTTFFAVTSILR   | +2y8  | 918.48  | 906.54  | 98.1 |
| 1242 | IGHA1 | P01876 | QEPSQGTTFFAVTSILR   | +2y7  | 918.48  | 759.47  | 98.1 |
| 1243 | IGHA1 | P01876 | QEPSQGTTFFAVTSILR   | +2y5  | 918.48  | 589.37  | 98.1 |
| 1244 | RS1   | O15537 | FQDSSQWLQIDLK       | +2y10 | 804.41  | 1217.65 | 89.8 |
| 1245 | RS1   | O15537 | FQDSSQWLQIDLK       | +2y9  | 804.41  | 1130.62 | 89.8 |
| 1246 | RS1   | O15537 | FQDSSQWLQIDLK       | +2y8  | 804.41  | 1043.59 | 89.8 |
| 1247 | RS1   | O15537 | FQDSSQWLQIDLK       | +2y7  | 804.41  | 915.53  | 89.8 |
| 1248 | RS1   | O15537 | FQDSSQWLQIDLK       | +2y6  | 804.41  | 729.45  | 89.8 |
| 1249 | APOC3 | P02656 | DALSSVQESQVAQQAR    | +2y10 | 858.93  | 1144.57 | 93.7 |
| 1250 | APOC3 | P02656 | DALSSVQESQVAQQAR    | +2y8  | 858.93  | 887.47  | 93.7 |
| 1251 | APOC3 | P02656 | DALSSVQESQVAQQAR    | +2y5  | 858.93  | 573.31  | 93.7 |
| 1252 | APOC3 | P02656 | DALSSVQESQVAQQAR    | +2y4  | 858.93  | 502.27  | 93.7 |
| 1253 | APOC3 | P02656 | DALSSVQESQVAQQAR    | +2y3  | 858.93  | 374.21  | 93.7 |
| 1254 | APOC3 | P02656 | GWVTDGFSSLK         | +2y9  | 598.80  | 953.49  | 74.8 |
| 1255 | APOC3 | P02656 | GWVTDGFSSLK         | +2y8  | 598.80  | 854.43  | 74.8 |
| 1256 | APOC3 | P02656 | GWVTDGFSSLK         | +2y7  | 598.80  | 753.38  | 74.8 |
| 1257 | APOC3 | P02656 | GWVTDGFSSLK         | +2y6  | 598.80  | 638.35  | 74.8 |
| 1258 | APOC3 | P02656 | GWVTDGFSSLK         | +2y4  | 598.80  | 434.26  | 74.8 |
| 1259 | APOC3 | P02656 | DYWSTVK             | +2y6  | 449.72  | 783.40  | 63.9 |
| 1260 | APOC3 | P02656 | DYWSTVK             | +2y5  | 449.72  | 620.34  | 63.9 |
| 1261 | APOC3 | P02656 | DYWSTVK             | +2y4  | 449.72  | 434.26  | 63.9 |
| 1262 | APOC3 | P02656 | DYWSTVK             | +2y3  | 449.72  | 347.23  | 63.9 |
| 1263 | APOC3 | P02656 | FSEFWDLDPVVRPTSAVAA | +2y13 | 1069.02 | 1325.71 | 109  |
| 1264 | APOC3 | P02656 | FSEFWDLDPVVRPTSAVAA | +2y12 | 1069.02 | 1212.62 | 109  |
| 1265 | APOC3 | P02656 | FSEFWDLDPVVRPTSAVAA | +2y11 | 1069.02 | 1097.59 | 109  |
| 1266 | APOC3 | P02656 | FSEFWDLDPVVRPTSAVAA | +2y9  | 1069.02 | 871.50  | 109  |
| 1267 | APOC3 | P02656 | FSEFWDLDPVVRPTSAVAA | +2y8  | 1069.02 | 772.43  | 109  |
| 1268 | APOE  | P02649 | WELALGR             | +2y6  | 422.74  | 658.39  | 61.9 |
| 1269 | APOE  | P02649 | WELALGR             | +2y5  | 422.74  | 529.35  | 61.9 |
| 1270 | APOE  | P02649 | WELALGR             | +2y4  | 422.74  | 416.26  | 61.9 |
| 1271 | APOE  | P02649 | WELALGR             | +2y3  | 422.74  | 345.22  | 61.9 |
| 1272 | APOE  | P02649 | SELEEQLTPVAEETR     | +2y10 | 865.93  | 1143.60 | 94.2 |
| 1273 | APOE  | P02649 | SELEEQLTPVAEETR     | +2y9  | 865.93  | 1015.54 | 94.2 |
| 1274 | APOE  | P02649 | SELEEQLTPVAEETR     | +2y8  | 865.93  | 902.46  | 94.2 |
| 1275 | APOE  | P02649 | SELEEQLTPVAEETR     | +2y7  | 865.93  | 801.41  | 94.2 |
| 1276 | APOE  | P02649 | SELEEQLTPVAEETR     | +2y5  | 865.93  | 605.29  | 94.2 |
| 1277 | APOE  | P02649 | ELQAAQAR            | +2y6  | 443.74  | 644.35  | 63.5 |
| 1278 | APOE  | P02649 | ELQAAQAR            | +2y5  | 443.74  | 516.29  | 63.5 |
| 1279 | APOE  | P02649 | ELQAAQAR            | +2y4  | 443.74  | 445.25  | 63.5 |
| 1280 | APOE  | P02649 | ELQAAQAR            | +2y3  | 443.74  | 374.21  | 63.5 |
| 1281 | APOE  | P02649 | AATVGSLAGQPLQER     | +2y11 | 749.40  | 1155.61 | 85.7 |
| 1282 | APOE  | P02649 | AATVGSLAGQPLQER     | +2y10 | 749.40  | 1098.59 | 85.7 |
| 1283 | APOE  | P02649 | AATVGSLAGQPLQER     | +2y8  | 749.40  | 898.47  | 85.7 |
| 1284 | APOE  | P02649 | AATVGSLAGQPLQER     | +2y7  | 749.40  | 827.44  | 85.7 |
| 1285 | APOE  | P02649 | AATVGSLAGQPLQER     | +2y5  | 749.40  | 642.36  | 85.7 |
| 1286 | APOE  | P02649 | LEEQAQQIR           | +2y7  | 557.80  | 872.46  | 71.8 |
| 1287 | APOE  | P02649 | LEEQAQQIR           | +2y6  | 557.80  | 743.42  | 71.8 |

|      |      |        |                   |       |         |         |       |
|------|------|--------|-------------------|-------|---------|---------|-------|
| 1288 | APOE | P02649 | LEEQAQQIR         | +2y5  | 557.80  | 615.36  | 71.8  |
| 1289 | APOE | P02649 | LEEQAQQIR         | +2y4  | 557.80  | 544.32  | 71.8  |
| 1290 | APOE | P02649 | LEEQAQQIR         | +2y3  | 557.80  | 416.26  | 71.8  |
| 1291 | CAT  | P04040 | LNIVITVGPR        | +2y7  | 484.80  | 741.46  | 66.5  |
| 1292 | CAT  | P04040 | LNIVITVGPR        | +2y6  | 484.80  | 642.39  | 66.5  |
| 1293 | CAT  | P04040 | LNIVITVGPR        | +2y5  | 484.80  | 529.31  | 66.5  |
| 1294 | CAT  | P04040 | LNIVITVGPR        | +2y4  | 484.80  | 428.26  | 66.5  |
| 1295 | CAT  | P04040 | LNIVITVGPR        | +2y3  | 484.80  | 329.19  | 66.5  |
| 1296 | CAT  | P04040 | FSTVAGESGSADTVR   | +2y11 | 742.35  | 1049.49 | 85.2  |
| 1297 | CAT  | P04040 | FSTVAGESGSADTVR   | +2y10 | 742.35  | 978.45  | 85.2  |
| 1298 | CAT  | P04040 | FSTVAGESGSADTVR   | +2y8  | 742.35  | 792.38  | 85.2  |
| 1299 | CAT  | P04040 | FSTVAGESGSADTVR   | +2y7  | 742.35  | 705.35  | 85.2  |
| 1300 | CAT  | P04040 | FSTVAGESGSADTVR   | +2y3  | 742.35  | 375.24  | 85.2  |
| 1301 | CAT  | P04040 | FNTANDDNVTQVR     | +2y9  | 747.35  | 1060.50 | 85.6  |
| 1302 | CAT  | P04040 | FNTANDDNVTQVR     | +2y7  | 747.35  | 831.43  | 85.6  |
| 1303 | CAT  | P04040 | FNTANDDNVTQVR     | +2y6  | 747.35  | 716.40  | 85.6  |
| 1304 | CAT  | P04040 | FNTANDDNVTQVR     | +2y4  | 747.35  | 503.29  | 85.6  |
| 1305 | CAT  | P04040 | FNTANDDNVTQVR     | +2y3  | 747.35  | 402.25  | 85.6  |
| 1306 | CAT  | P04040 | AFYVNVLNNEEQR     | +2y8  | 741.37  | 1001.50 | 85.2  |
| 1307 | CAT  | P04040 | AFYVNVLNNEEQR     | +2y7  | 741.37  | 887.46  | 85.2  |
| 1308 | CAT  | P04040 | AFYVNVLNNEEQR     | +2y6  | 741.37  | 788.39  | 85.2  |
| 1309 | CAT  | P04040 | AFYVNVLNNEEQR     | +2y5  | 741.37  | 675.31  | 85.2  |
| 1310 | CAT  | P04040 | AFYVNVLNNEEQR     | +2y2  | 741.37  | 303.18  | 85.2  |
| 1311 | CAT  | P04040 | DAQIFIQK          | +2y6  | 481.77  | 776.47  | 66.2  |
| 1312 | CAT  | P04040 | DAQIFIQK          | +2y5  | 481.77  | 648.41  | 66.2  |
| 1313 | CAT  | P04040 | DAQIFIQK          | +2y4  | 481.77  | 535.32  | 66.2  |
| 1314 | CAT  | P04040 | DAQIFIQK          | +2y3  | 481.77  | 388.26  | 66.2  |
| 1315 | VCAN | P13611 | LATVGELQAAWR      | +2y8  | 657.86  | 930.48  | 79.1  |
| 1316 | VCAN | P13611 | LATVGELQAAWR      | +2y5  | 657.86  | 631.33  | 79.1  |
| 1317 | VCAN | P13611 | LATVGELQAAWR      | +2y4  | 657.86  | 503.27  | 79.1  |
| 1318 | VCAN | P13611 | LATVGELQAAWR      | +2y3  | 657.86  | 432.24  | 79.1  |
| 1319 | VCAN | P13611 | LATVGELQAAWR      | +2y2  | 657.86  | 361.20  | 79.1  |
| 1320 | VCAN | P13611 | ITEGTTQEEFPWK     | +2y10 | 783.38  | 1222.57 | 88.2  |
| 1321 | VCAN | P13611 | ITEGTTQEEFPWK     | +2y8  | 783.38  | 1064.50 | 88.2  |
| 1322 | VCAN | P13611 | ITEGTTQEEFPWK     | +2y6  | 783.38  | 835.40  | 88.2  |
| 1323 | VCAN | P13611 | ITEGTTQEEFPWK     | +2y4  | 783.38  | 577.31  | 88.2  |
| 1324 | VCAN | P13611 | ITEGTTQEEFPWK     | +2y3  | 783.38  | 430.24  | 88.2  |
| 1325 | VCAN | P13611 | DPEAAEAR          | +2y6  | 429.70  | 646.32  | 62.4  |
| 1326 | VCAN | P13611 | DPEAAEAR          | +2y5  | 429.70  | 517.27  | 62.4  |
| 1327 | VCAN | P13611 | DPEAAEAR          | +2y4  | 429.70  | 446.24  | 62.4  |
| 1328 | VCAN | P13611 | DPEAAEAR          | +2y3  | 429.70  | 375.20  | 62.4  |
| 1329 | VCAN | P13611 | QEIESETTSEEQIQEEK | +2y11 | 1018.96 | 1321.61 | 105.4 |
| 1330 | VCAN | P13611 | QEIESETTSEEQIQEEK | +2y10 | 1018.96 | 1220.56 | 105.4 |
| 1331 | VCAN | P13611 | QEIESETTSEEQIQEEK | +2y9  | 1018.96 | 1119.52 | 105.4 |
| 1332 | VCAN | P13611 | QEIESETTSEEQIQEEK | +2y7  | 1018.96 | 903.44  | 105.4 |
| 1333 | VCAN | P13611 | QEIESETTSEEQIQEEK | +2y4  | 1018.96 | 533.26  | 105.4 |
| 1334 | VCAN | P13611 | GQDSTIAASEQQVAAR  | +2y10 | 816.40  | 1030.53 | 90.6  |
| 1335 | VCAN | P13611 | GQDSTIAASEQQVAAR  | +2y9  | 816.40  | 959.49  | 90.6  |
| 1336 | VCAN | P13611 | GQDSTIAASEQQVAAR  | +2y8  | 816.40  | 888.45  | 90.6  |
| 1337 | VCAN | P13611 | GQDSTIAASEQQVAAR  | +2y7  | 816.40  | 801.42  | 90.6  |

|      |       |        |                  |       |        |         |      |
|------|-------|--------|------------------|-------|--------|---------|------|
| 1338 | VCAN  | P13611 | GQDSTIAASEQQVAAR | +2y6  | 816.40 | 672.38  | 90.6 |
| 1339 | C5    | P01031 | FQNSAILTIQPK     | +2y10 | 680.39 | 1084.64 | 80.7 |
| 1340 | C5    | P01031 | FQNSAILTIQPK     | +2y7  | 680.39 | 812.52  | 80.7 |
| 1341 | C5    | P01031 | FQNSAILTIQPK     | +2y6  | 680.39 | 699.44  | 80.7 |
| 1342 | C5    | P01031 | FQNSAILTIQPK     | +2y5  | 680.39 | 586.36  | 80.7 |
| 1343 | C5    | P01031 | FQNSAILTIQPK     | +2y3  | 680.39 | 372.22  | 80.7 |
| 1344 | C5    | P01031 | VVTEADVYITFGIR   | +2y7  | 791.93 | 869.49  | 88.8 |
| 1345 | C5    | P01031 | VVTEADVYITFGIR   | +2y6  | 791.93 | 706.42  | 88.8 |
| 1346 | C5    | P01031 | VVTEADVYITFGIR   | +2y5  | 791.93 | 593.34  | 88.8 |
| 1347 | C5    | P01031 | VVTEADVYITFGIR   | +2y4  | 791.93 | 492.29  | 88.8 |
| 1348 | C5    | P01031 | VVTEADVYITFGIR   | +2y3  | 791.93 | 345.22  | 88.8 |
| 1349 | C5    | P01031 | TDAPDLPEENQAR    | +2y10 | 728.34 | 1168.56 | 84.2 |
| 1350 | C5    | P01031 | TDAPDLPEENQAR    | +2y9  | 728.34 | 1071.51 | 84.2 |
| 1351 | C5    | P01031 | TDAPDLPEENQAR    | +2y8  | 728.34 | 956.48  | 84.2 |
| 1352 | C5    | P01031 | TDAPDLPEENQAR    | +2y7  | 728.34 | 843.40  | 84.2 |
| 1353 | C5    | P01031 | TDAPDLPEENQAR    | +2y5  | 728.34 | 617.30  | 84.2 |
| 1354 | C5    | P01031 | ENSLYLTAFTVIGIR  | +2y11 | 848.97 | 1253.73 | 93   |
| 1355 | C5    | P01031 | ENSLYLTAFTVIGIR  | +2y10 | 848.97 | 1090.66 | 93   |
| 1356 | C5    | P01031 | ENSLYLTAFTVIGIR  | +2y9  | 848.97 | 977.58  | 93   |
| 1357 | C5    | P01031 | ENSLYLTAFTVIGIR  | +2y8  | 848.97 | 876.53  | 93   |
| 1358 | C5    | P01031 | ENSLYLTAFTVIGIR  | +2y7  | 848.97 | 805.49  | 93   |
| 1359 | C5    | P01031 | ALVEGVDQLFTDYQIK | +2y10 | 919.98 | 1270.63 | 98.2 |
| 1360 | C5    | P01031 | ALVEGVDQLFTDYQIK | +2y8  | 919.98 | 1027.55 | 98.2 |
| 1361 | C5    | P01031 | ALVEGVDQLFTDYQIK | +2y6  | 919.98 | 767.39  | 98.2 |
| 1362 | C5    | P01031 | ALVEGVDQLFTDYQIK | +2y5  | 919.98 | 666.35  | 98.2 |
| 1363 | C5    | P01031 | ALVEGVDQLFTDYQIK | +2y4  | 919.98 | 551.32  | 98.2 |
| 1364 | GAPDH | P04406 | LVINGNPITIFQER   | +2y10 | 807.45 | 1174.62 | 90   |
| 1365 | GAPDH | P04406 | LVINGNPITIFQER   | +2y8  | 807.45 | 1003.56 | 90   |
| 1366 | GAPDH | P04406 | LVINGNPITIFQER   | +2y6  | 807.45 | 793.42  | 90   |
| 1367 | GAPDH | P04406 | LVINGNPITIFQER   | +2y5  | 807.45 | 692.37  | 90   |
| 1368 | GAPDH | P04406 | LVINGNPITIFQER   | +2y4  | 807.45 | 579.29  | 90   |
| 1369 | GAPDH | P04406 | GALQNIIPASTGAAK  | +2y11 | 706.40 | 1042.59 | 82.6 |
| 1370 | GAPDH | P04406 | GALQNIIPASTGAAK  | +2y10 | 706.40 | 928.55  | 82.6 |
| 1371 | GAPDH | P04406 | GALQNIIPASTGAAK  | +2y9  | 706.40 | 815.46  | 82.6 |
| 1372 | GAPDH | P04406 | GALQNIIPASTGAAK  | +2y8  | 706.40 | 702.38  | 82.6 |
| 1373 | GAPDH | P04406 | GALQNIIPASTGAAK  | +2y6  | 706.40 | 534.29  | 82.6 |
| 1374 | GAPDH | P04406 | VIPELNGK         | +2y6  | 435.26 | 657.36  | 62.8 |
| 1375 | GAPDH | P04406 | VIPELNGK         | +2y5  | 435.26 | 560.30  | 62.8 |
| 1376 | GAPDH | P04406 | VIPELNGK         | +2y3  | 435.26 | 318.18  | 62.8 |
| 1377 | GAPDH | P04406 | LISWYDNEFGYSNR   | +2y10 | 882.40 | 1264.52 | 95.4 |
| 1378 | GAPDH | P04406 | LISWYDNEFGYSNR   | +2y9  | 882.40 | 1101.46 | 95.4 |
| 1379 | GAPDH | P04406 | LISWYDNEFGYSNR   | +2y8  | 882.40 | 986.43  | 95.4 |
| 1380 | GAPDH | P04406 | LISWYDNEFGYSNR   | +2y6  | 882.40 | 743.35  | 95.4 |
| 1381 | GAPDH | P04406 | LISWYDNEFGYSNR   | +2y5  | 882.40 | 596.28  | 95.4 |
| 1382 | KRT1  | P04264 | FLEQQNQVLQTK     | +2y8  | 738.40 | 958.53  | 84.9 |
| 1383 | KRT1  | P04264 | FLEQQNQVLQTK     | +2y7  | 738.40 | 830.47  | 84.9 |
| 1384 | KRT1  | P04264 | FLEQQNQVLQTK     | +2y5  | 738.40 | 588.37  | 84.9 |
| 1385 | KRT1  | P04264 | FLEQQNQVLQTK     | +2y4  | 738.40 | 489.30  | 84.9 |
| 1386 | KRT1  | P04264 | FLEQQNQVLQTK     | +2y3  | 738.40 | 376.22  | 84.9 |
| 1387 | KRT1  | P04264 | AQYEDIAQK        | +2y7  | 533.26 | 866.43  | 70   |

|      |      |        |                 |       |        |         |      |
|------|------|--------|-----------------|-------|--------|---------|------|
| 1388 | KRT1 | P04264 | AQYEDIAQK       | +2y6  | 533.26 | 703.36  | 70   |
| 1389 | KRT1 | P04264 | AQYEDIAQK       | +2y5  | 533.26 | 574.32  | 70   |
| 1390 | KRT1 | P04264 | AQYEDIAQK       | +2y4  | 533.26 | 459.29  | 70   |
| 1391 | KRT1 | P04264 | AQYEDIAQK       | +2y3  | 533.26 | 346.21  | 70   |
| 1392 | KRT1 | P04264 | QISNLQQSISDAEQR | +2y9  | 858.93 | 1033.49 | 93.7 |
| 1393 | KRT1 | P04264 | QISNLQQSISDAEQR | +2y8  | 858.93 | 905.43  | 93.7 |
| 1394 | KRT1 | P04264 | QISNLQQSISDAEQR | +2y6  | 858.93 | 705.32  | 93.7 |
| 1395 | KRT1 | P04264 | QISNLQQSISDAEQR | +2y4  | 858.93 | 503.26  | 93.7 |
| 1396 | KRT1 | P04264 | QISNLQQSISDAEQR | +2y2  | 858.93 | 303.18  | 93.7 |
| 1397 | KRT1 | P04264 | LALDLEIATYR     | +2y8  | 639.36 | 980.50  | 77.7 |
| 1398 | KRT1 | P04264 | LALDLEIATYR     | +2y6  | 639.36 | 752.39  | 77.7 |
| 1399 | KRT1 | P04264 | LALDLEIATYR     | +2y5  | 639.36 | 623.35  | 77.7 |
| 1400 | KRT1 | P04264 | LALDLEIATYR     | +2y4  | 639.36 | 510.27  | 77.7 |
| 1401 | KRT1 | P04264 | LALDLEIATYR     | +2y3  | 639.36 | 439.23  | 77.7 |
| 1402 | KRT1 | P04264 | GSGGGSSGGSIGGR  | +2y10 | 546.76 | 834.41  | 71   |
| 1403 | KRT1 | P04264 | GSGGGSSGGSIGGR  | +2y9  | 546.76 | 777.38  | 71   |
| 1404 | KRT1 | P04264 | GSGGGSSGGSIGGR  | +2y8  | 546.76 | 690.35  | 71   |
| 1405 | KRT1 | P04264 | GSGGGSSGGSIGGR  | +2y7  | 546.76 | 603.32  | 71   |
| 1406 | KRT1 | P04264 | GSGGGSSGGSIGGR  | +2y6  | 546.76 | 546.30  | 71   |
| 1407 | HPR  | P00739 | TEGDGVYTLNDK    | +2y10 | 656.31 | 1081.52 | 79   |
| 1408 | HPR  | P00739 | TEGDGVYTLNDK    | +2y6  | 656.31 | 753.38  | 79   |
| 1409 | HPR  | P00739 | TEGDGVYTLNDK    | +2y5  | 656.31 | 590.31  | 79   |
| 1410 | HPR  | P00739 | TEGDGVYTLNDK    | +2y4  | 656.31 | 489.27  | 79   |
| 1411 | HPR  | P00739 | TEGDGVYTLNDK    | +2y3  | 656.31 | 376.18  | 79   |
| 1412 | HPR  | P00739 | NPANPVQR        | +2y6  | 448.24 | 684.38  | 63.8 |
| 1413 | HPR  | P00739 | NPANPVQR        | +2y5  | 448.24 | 613.34  | 63.8 |
| 1414 | HPR  | P00739 | NPANPVQR        | +2y4  | 448.24 | 499.30  | 63.8 |
| 1415 | HPR  | P00739 | NPANPVQR        | +2y3  | 448.24 | 402.25  | 63.8 |
| 1416 | HPR  | P00739 | NPANPVQR        | +2y2  | 448.24 | 303.18  | 63.8 |
| 1417 | HPR  | P00739 | GSFPWQAK        | +2y6  | 460.73 | 776.41  | 64.7 |
| 1418 | HPR  | P00739 | GSFPWQAK        | +2y5  | 460.73 | 629.34  | 64.7 |
| 1419 | HPR  | P00739 | GSFPWQAK        | +2y4  | 460.73 | 532.29  | 64.7 |
| 1420 | HPR  | P00739 | GSFPWQAK        | +2y3  | 460.73 | 346.21  | 64.7 |
| 1421 | HPR  | P00739 | DIAPTLTLYVGK    | +2y9  | 645.87 | 991.58  | 78.2 |
| 1422 | HPR  | P00739 | DIAPTLTLYVGK    | +2y8  | 645.87 | 894.53  | 78.2 |
| 1423 | HPR  | P00739 | DIAPTLTLYVGK    | +2y6  | 645.87 | 680.40  | 78.2 |
| 1424 | HPR  | P00739 | DIAPTLTLYVGK    | +2y5  | 645.87 | 579.35  | 78.2 |
| 1425 | HPR  | P00739 | DIAPTLTLYVGK    | +2y4  | 645.87 | 466.27  | 78.2 |
| 1426 | HPR  | P00739 | QLVEIEK         | +2y5  | 429.75 | 617.35  | 62.4 |
| 1427 | HPR  | P00739 | QLVEIEK         | +2y4  | 429.75 | 518.28  | 62.4 |
| 1428 | HPR  | P00739 | QLVEIEK         | +2y3  | 429.75 | 389.24  | 62.4 |
| 1429 | HBB  | P68871 | LLVVYPWTQR      | +2y8  | 637.87 | 1048.56 | 77.6 |
| 1430 | HBB  | P68871 | LLVVYPWTQR      | +2y7  | 637.87 | 949.49  | 77.6 |
| 1431 | HBB  | P68871 | LLVVYPWTQR      | +2y6  | 637.87 | 850.42  | 77.6 |
| 1432 | HBB  | P68871 | LLVVYPWTQR      | +2y5  | 637.87 | 687.36  | 77.6 |
| 1433 | HBB  | P68871 | LLVVYPWTQR      | +2y3  | 637.87 | 404.23  | 77.6 |
| 1434 | HBB  | P68871 | EFTPPVQAAYQK    | +2y9  | 689.85 | 1001.54 | 81.4 |
| 1435 | HBB  | P68871 | EFTPPVQAAYQK    | +2y8  | 689.85 | 904.49  | 81.4 |
| 1436 | HBB  | P68871 | EFTPPVQAAYQK    | +2y6  | 689.85 | 708.37  | 81.4 |
| 1437 | HBB  | P68871 | EFTPPVQAAYQK    | +2y5  | 689.85 | 580.31  | 81.4 |

|      |      |        |                     |       |        |         |       |
|------|------|--------|---------------------|-------|--------|---------|-------|
| 1438 | HBB  | P68871 | EFTPPVQAAYQK        | +2y3  | 689.85 | 438.23  | 81.4  |
| 1439 | HRG  | P04196 | DGYLFQLLR           | +2y7  | 562.81 | 952.56  | 72.1  |
| 1440 | HRG  | P04196 | DGYLFQLLR           | +2y6  | 562.81 | 789.50  | 72.1  |
| 1441 | HRG  | P04196 | DGYLFQLLR           | +2y5  | 562.81 | 676.41  | 72.1  |
| 1442 | HRG  | P04196 | DGYLFQLLR           | +2y4  | 562.81 | 529.35  | 72.1  |
| 1443 | HRG  | P04196 | DGYLFQLLR           | +2y3  | 562.81 | 401.29  | 72.1  |
| 1444 | HRG  | P04196 | DSPVLIDFFEDTER      | +2y9  | 841.90 | 1171.53 | 92.5  |
| 1445 | HRG  | P04196 | DSPVLIDFFEDTER      | +2y8  | 841.90 | 1058.44 | 92.5  |
| 1446 | HRG  | P04196 | DSPVLIDFFEDTER      | +2y7  | 841.90 | 943.42  | 92.5  |
| 1447 | HRG  | P04196 | DSPVLIDFFEDTER      | +2y6  | 841.90 | 796.35  | 92.5  |
| 1448 | HRG  | P04196 | DSPVLIDFFEDTER      | +2y3  | 841.90 | 405.21  | 92.5  |
| 1449 | HRG  | P04196 | EENDDFASFR          | +2y6  | 615.26 | 742.35  | 76    |
| 1450 | HRG  | P04196 | EENDDFASFR          | +2y5  | 615.26 | 627.32  | 76    |
| 1451 | HRG  | P04196 | EENDDFASFR          | +2y4  | 615.26 | 480.26  | 76    |
| 1452 | HRG  | P04196 | EENDDFASFR          | +2y3  | 615.26 | 409.22  | 76    |
| 1453 | HRG  | P04196 | EENDDFASFR          | +2y2  | 615.26 | 322.19  | 76    |
| 1454 | HRG  | P04196 | GGEGTGYFVDFSVR      | +2y9  | 745.85 | 1089.54 | 85.5  |
| 1455 | HRG  | P04196 | GGEGTGYFVDFSVR      | +2y7  | 745.85 | 869.45  | 85.5  |
| 1456 | HRG  | P04196 | GGEGTGYFVDFSVR      | +2y6  | 745.85 | 722.38  | 85.5  |
| 1457 | HRG  | P04196 | GGEGTGYFVDFSVR      | +2y5  | 745.85 | 623.31  | 85.5  |
| 1458 | HRG  | P04196 | GGEGTGYFVDFSVR      | +2y4  | 745.85 | 508.29  | 85.5  |
| 1459 | HRG  | P04196 | ADLFYDVEALDLESPK    | +2y12 | 912.95 | 1378.67 | 97.7  |
| 1460 | HRG  | P04196 | ADLFYDVEALDLESPK    | +2y11 | 912.95 | 1215.61 | 97.7  |
| 1461 | HRG  | P04196 | ADLFYDVEALDLESPK    | +2y9  | 912.95 | 1001.51 | 97.7  |
| 1462 | HRG  | P04196 | ADLFYDVEALDLESPK    | +2y8  | 912.95 | 872.47  | 97.7  |
| 1463 | HRG  | P04196 | ADLFYDVEALDLESPK    | +2y3  | 912.95 | 331.20  | 97.7  |
| 1464 | CD14 | P08571 | VDADADPR            | +2y7  | 429.70 | 759.33  | 62.4  |
| 1465 | CD14 | P08571 | VDADADPR            | +2y6  | 429.70 | 644.30  | 62.4  |
| 1466 | CD14 | P08571 | VDADADPR            | +2y5  | 429.70 | 573.26  | 62.4  |
| 1467 | CD14 | P08571 | VDADADPR            | +2y4  | 429.70 | 458.24  | 62.4  |
| 1468 | CD14 | P08571 | VDADADPR            | +2y3  | 429.70 | 387.20  | 62.4  |
| 1469 | CD14 | P08571 | SWLAELQQWLKPGLK     | +2y10 | 899.01 | 1210.73 | 96.7  |
| 1470 | CD14 | P08571 | SWLAELQQWLKPGLK     | +2y9  | 899.01 | 1097.65 | 96.7  |
| 1471 | CD14 | P08571 | SWLAELQQWLKPGLK     | +2y7  | 899.01 | 841.53  | 96.7  |
| 1472 | CD14 | P08571 | SWLAELQQWLKPGLK     | +2y5  | 899.01 | 542.37  | 96.7  |
| 1473 | CD14 | P08571 | SWLAELQQWLKPGLK     | +2y4  | 899.01 | 414.27  | 96.7  |
| 1474 | CD14 | P08571 | AFPALTSLDLSDNPGLGER | +2y11 | 987.00 | 1172.55 | 103.1 |
| 1475 | CD14 | P08571 | AFPALTSLDLSDNPGLGER | +2y9  | 987.00 | 944.44  | 103.1 |
| 1476 | CD14 | P08571 | AFPALTSLDLSDNPGLGER | +2y8  | 987.00 | 857.41  | 103.1 |
| 1477 | CD14 | P08571 | AFPALTSLDLSDNPGLGER | +2y7  | 987.00 | 742.38  | 103.1 |
| 1478 | CD14 | P08571 | AFPALTSLDLSDNPGLGER | +2y6  | 987.00 | 628.34  | 103.1 |
| 1479 | CD14 | P08571 | FPAIQNLALR          | +2y8  | 571.84 | 898.55  | 72.8  |
| 1480 | CD14 | P08571 | FPAIQNLALR          | +2y7  | 571.84 | 827.51  | 72.8  |
| 1481 | CD14 | P08571 | FPAIQNLALR          | +2y6  | 571.84 | 714.43  | 72.8  |
| 1482 | CD14 | P08571 | FPAIQNLALR          | +2y5  | 571.84 | 586.37  | 72.8  |
| 1483 | CD14 | P08571 | FPAIQNLALR          | +2y3  | 571.84 | 359.24  | 72.8  |
| 1484 | CD14 | P08571 | ATVNPSAPR           | +2y7  | 456.75 | 740.40  | 64.4  |
| 1485 | CD14 | P08571 | ATVNPSAPR           | +2y6  | 456.75 | 641.34  | 64.4  |
| 1486 | CD14 | P08571 | ATVNPSAPR           | +2y5  | 456.75 | 527.29  | 64.4  |
| 1487 | CD14 | P08571 | ATVNPSAPR           | +2y4  | 456.75 | 430.24  | 64.4  |

|      |        |        |                 |       |        |         |      |
|------|--------|--------|-----------------|-------|--------|---------|------|
| 1488 | CD14   | P08571 | ATVNPSAPR       | +2y3  | 456.75 | 343.21  | 64.4 |
| 1489 | RNASE1 | P07998 | LTNGSR          | +2y5  | 324.18 | 534.26  | 54.7 |
| 1490 | RNASE1 | P07998 | LTNGSR          | +2y4  | 324.18 | 433.22  | 54.7 |
| 1491 | RNASE1 | P07998 | LTNGSR          | +2y3  | 324.18 | 319.17  | 54.7 |
| 1492 | SOD3   | P08294 | VTGVVLF         | +2y7  | 445.78 | 791.48  | 63.6 |
| 1493 | SOD3   | P08294 | VTGVVLF         | +2y6  | 445.78 | 690.43  | 63.6 |
| 1494 | SOD3   | P08294 | VTGVVLF         | +2y4  | 445.78 | 534.34  | 63.6 |
| 1495 | SOD3   | P08294 | VTGVVLF         | +2y3  | 445.78 | 435.27  | 63.6 |
| 1496 | SOD3   | P08294 | GGNQASVENGNAGR  | +2y10 | 665.81 | 974.46  | 79.7 |
| 1497 | SOD3   | P08294 | GGNQASVENGNAGR  | +2y9  | 665.81 | 903.43  | 79.7 |
| 1498 | SOD3   | P08294 | GGNQASVENGNAGR  | +2y8  | 665.81 | 816.40  | 79.7 |
| 1499 | SOD3   | P08294 | GGNQASVENGNAGR  | +2y7  | 665.81 | 717.33  | 79.7 |
| 1500 | SOD3   | P08294 | GGNQASVENGNAGR  | +2y6  | 665.81 | 588.28  | 79.7 |
| 1501 | VTN    | P04004 | AVRPGYPK        | +2y7  | 444.26 | 816.47  | 63.5 |
| 1502 | VTN    | P04004 | AVRPGYPK        | +2y6  | 444.26 | 717.40  | 63.5 |
| 1503 | VTN    | P04004 | AVRPGYPK        | +2y5  | 444.26 | 561.30  | 63.5 |
| 1504 | VTN    | P04004 | AVRPGYPK        | +2y4  | 444.26 | 464.25  | 63.5 |
| 1505 | VTN    | P04004 | AVRPGYPK        | +2y3  | 444.26 | 407.23  | 63.5 |
| 1506 | VTN    | P04004 | DVWGIEGPIDAAFTR | +2y12 | 823.91 | 1246.64 | 91.2 |
| 1507 | VTN    | P04004 | DVWGIEGPIDAAFTR | +2y10 | 823.91 | 1076.54 | 91.2 |
| 1508 | VTN    | P04004 | DVWGIEGPIDAAFTR | +2y9  | 823.91 | 947.49  | 91.2 |
| 1509 | VTN    | P04004 | DVWGIEGPIDAAFTR | +2y8  | 823.91 | 890.47  | 91.2 |
| 1510 | VTN    | P04004 | DVWGIEGPIDAAFTR | +2y5  | 823.91 | 565.31  | 91.2 |
| 1511 | VTN    | P04004 | FEDGVLPDPYPR    | +2y10 | 711.83 | 1146.54 | 83   |
| 1512 | VTN    | P04004 | FEDGVLPDPYPR    | +2y7  | 711.83 | 875.43  | 83   |
| 1513 | VTN    | P04004 | FEDGVLPDPYPR    | +2y6  | 711.83 | 762.34  | 83   |
| 1514 | VTN    | P04004 | FEDGVLPDPYPR    | +2y5  | 711.83 | 647.31  | 83   |
| 1515 | VTN    | P04004 | FEDGVLPDPYPR    | +2y3  | 711.83 | 435.24  | 83   |
| 1516 | VTN    | P04004 | DSWEDIFELLFWGR  | +2y8  | 906.93 | 1067.57 | 97.2 |
| 1517 | VTN    | P04004 | DSWEDIFELLFWGR  | +2y6  | 906.93 | 791.46  | 97.2 |
| 1518 | VTN    | P04004 | DSWEDIFELLFWGR  | +2y5  | 906.93 | 678.37  | 97.2 |
| 1519 | VTN    | P04004 | DSWEDIFELLFWGR  | +2y4  | 906.93 | 565.29  | 97.2 |
| 1520 | VTN    | P04004 | DSWEDIFELLFWGR  | +2y3  | 906.93 | 418.22  | 97.2 |
| 1521 | VTN    | P04004 | VDTVDPYPYPR     | +2y8  | 579.79 | 944.48  | 73.4 |
| 1522 | VTN    | P04004 | VDTVDPYPYPR     | +2y7  | 579.79 | 843.44  | 73.4 |
| 1523 | VTN    | P04004 | VDTVDPYPYPR     | +2y6  | 579.79 | 744.37  | 73.4 |
| 1524 | VTN    | P04004 | VDTVDPYPYPR     | +2y5  | 579.79 | 629.34  | 73.4 |
| 1525 | VTN    | P04004 | VDTVDPYPYPR     | +2y4  | 579.79 | 532.29  | 73.4 |
| 1526 | CFI    | G3XAM2 | AQLGDLPWQVAIK   | +2y11 | 719.91 | 1239.71 | 83.6 |
| 1527 | CFI    | G3XAM2 | AQLGDLPWQVAIK   | +2y10 | 719.91 | 1126.63 | 83.6 |
| 1528 | CFI    | G3XAM2 | AQLGDLPWQVAIK   | +2y8  | 719.91 | 954.58  | 83.6 |
| 1529 | CFI    | G3XAM2 | AQLGDLPWQVAIK   | +2y7  | 719.91 | 841.49  | 83.6 |
| 1530 | CFI    | G3XAM2 | AQLGDLPWQVAIK   | +2y3  | 719.91 | 331.23  | 83.6 |
| 1531 | CFI    | G3XAM2 | IVIEYVDR        | +2y7  | 503.78 | 893.47  | 67.8 |
| 1532 | CFI    | G3XAM2 | IVIEYVDR        | +2y6  | 503.78 | 794.40  | 67.8 |
| 1533 | CFI    | G3XAM2 | IVIEYVDR        | +2y5  | 503.78 | 681.32  | 67.8 |
| 1534 | CFI    | G3XAM2 | IVIEYVDR        | +2y4  | 503.78 | 552.28  | 67.8 |
| 1535 | CFI    | G3XAM2 | IVIEYVDR        | +2y3  | 503.78 | 389.21  | 67.8 |
| 1536 | CFI    | G3XAM2 | VFSLQWGEVK      | +2y8  | 596.82 | 946.50  | 74.6 |
| 1537 | CFI    | G3XAM2 | VFSLQWGEVK      | +2y7  | 596.82 | 859.47  | 74.6 |

|      |     |        |                      |       |         |         |       |
|------|-----|--------|----------------------|-------|---------|---------|-------|
| 1538 | CFI | G3XAM2 | VFSLQWGEVK           | +2y6  | 596.82  | 746.38  | 74.6  |
| 1539 | CFI | G3XAM2 | VFSLQWGEVK           | +2y5  | 596.82  | 618.32  | 74.6  |
| 1540 | CFI | G3XAM2 | VFSLQWGEVK           | +2y4  | 596.82  | 432.25  | 74.6  |
| 1541 | C6  | P13671 | VPANLENVGFEVQTAEDDLK | +2y12 | 1094.54 | 1351.64 | 110.9 |
| 1542 | C6  | P13671 | VPANLENVGFEVQTAEDDLK | +2y11 | 1094.54 | 1294.62 | 110.9 |
| 1543 | C6  | P13671 | VPANLENVGFEVQTAEDDLK | +2y10 | 1094.54 | 1147.55 | 110.9 |
| 1544 | C6  | P13671 | VPANLENVGFEVQTAEDDLK | +2y9  | 1094.54 | 1018.51 | 110.9 |
| 1545 | C6  | P13671 | VPANLENVGFEVQTAEDDLK | +2y7  | 1094.54 | 791.38  | 110.9 |
| 1546 | C6  | P13671 | SEYGAALAWEK          | +2y9  | 612.80  | 1008.51 | 75.8  |
| 1547 | C6  | P13671 | SEYGAALAWEK          | +2y8  | 612.80  | 845.45  | 75.8  |
| 1548 | C6  | P13671 | SEYGAALAWEK          | +2y6  | 612.80  | 717.39  | 75.8  |
| 1549 | C6  | P13671 | SEYGAALAWEK          | +2y5  | 612.80  | 646.36  | 75.8  |
| 1550 | C6  | P13671 | SEYGAALAWEK          | +2y3  | 612.80  | 462.23  | 75.8  |
| 1551 | C6  | P13671 | TFSEWLESVK           | +2y8  | 613.31  | 977.49  | 75.8  |
| 1552 | C6  | P13671 | TFSEWLESVK           | +2y7  | 613.31  | 890.46  | 75.8  |
| 1553 | C6  | P13671 | TFSEWLESVK           | +2y6  | 613.31  | 761.42  | 75.8  |
| 1554 | C6  | P13671 | TFSEWLESVK           | +2y5  | 613.31  | 575.34  | 75.8  |
| 1555 | C6  | P13671 | TFSEWLESVK           | +2y4  | 613.31  | 462.26  | 75.8  |
| 1556 | C6  | P13671 | ENPAVIDFELAPIVDLVR   | +2y12 | 1005.55 | 1386.76 | 104.4 |
| 1557 | C6  | P13671 | ENPAVIDFELAPIVDLVR   | +2y10 | 1005.55 | 1124.67 | 104.4 |
| 1558 | C6  | P13671 | ENPAVIDFELAPIVDLVR   | +2y9  | 1005.55 | 995.62  | 104.4 |
| 1559 | C6  | P13671 | ENPAVIDFELAPIVDLVR   | +2y8  | 1005.55 | 882.54  | 104.4 |
| 1560 | C6  | P13671 | ENPAVIDFELAPIVDLVR   | +2y7  | 1005.55 | 811.50  | 104.4 |
| 1561 | C6  | P13671 | QLEWGLER             | +2y6  | 515.77  | 789.39  | 68.7  |
| 1562 | C6  | P13671 | QLEWGLER             | +2y5  | 515.77  | 660.35  | 68.7  |
| 1563 | C6  | P13671 | QLEWGLER             | +2y4  | 515.77  | 474.27  | 68.7  |
| 1564 | C6  | P13671 | QLEWGLER             | +2y3  | 515.77  | 417.25  | 68.7  |
| 1565 | C6  | P13671 | QLEWGLER             | +2y2  | 515.77  | 304.16  | 68.7  |
| 1566 | C7  | P10643 | LSGNVLSYTFQVK        | +2y8  | 728.40  | 985.54  | 84.2  |
| 1567 | C7  | P10643 | LSGNVLSYTFQVK        | +2y7  | 728.40  | 872.45  | 84.2  |
| 1568 | C7  | P10643 | LSGNVLSYTFQVK        | +2y6  | 728.40  | 785.42  | 84.2  |
| 1569 | C7  | P10643 | LSGNVLSYTFQVK        | +2y5  | 728.40  | 622.36  | 84.2  |
| 1570 | C7  | P10643 | LSGNVLSYTFQVK        | +2y3  | 728.40  | 374.24  | 84.2  |
| 1571 | C7  | P10643 | INNDFNIEFYNSTWSYVK   | +2y10 | 1152.52 | 1294.61 | 115.1 |
| 1572 | C7  | P10643 | INNDFNIEFYNSTWSYVK   | +2y7  | 1152.52 | 870.44  | 115.1 |
| 1573 | C7  | P10643 | INNDFNIEFYNSTWSYVK   | +2y6  | 1152.52 | 783.40  | 115.1 |
| 1574 | C7  | P10643 | INNDFNIEFYNSTWSYVK   | +2y5  | 1152.52 | 682.36  | 115.1 |
| 1575 | C7  | P10643 | INNDFNIEFYNSTWSYVK   | +2y4  | 1152.52 | 496.28  | 115.1 |
| 1576 | C7  | P10643 | AASGTQNNVLR          | +2y9  | 565.80  | 988.52  | 72.4  |
| 1577 | C7  | P10643 | AASGTQNNVLR          | +2y8  | 565.80  | 901.49  | 72.4  |
| 1578 | C7  | P10643 | AASGTQNNVLR          | +2y7  | 565.80  | 844.46  | 72.4  |
| 1579 | C7  | P10643 | AASGTQNNVLR          | +2y6  | 565.80  | 743.42  | 72.4  |
| 1580 | C7  | P10643 | AASGTQNNVLR          | +2y5  | 565.80  | 615.36  | 72.4  |
| 1581 | C7  | P10643 | YSAWAESVTNLPQVIK     | +2y12 | 903.48  | 1298.73 | 97    |
| 1582 | C7  | P10643 | YSAWAESVTNLPQVIK     | +2y10 | 903.48  | 1098.65 | 97    |
| 1583 | C7  | P10643 | YSAWAESVTNLPQVIK     | +2y8  | 903.48  | 912.55  | 97    |
| 1584 | C7  | P10643 | YSAWAESVTNLPQVIK     | +2y7  | 903.48  | 811.50  | 97    |
| 1585 | C7  | P10643 | YSAWAESVTNLPQVIK     | +2y5  | 903.48  | 584.38  | 97    |
| 1586 | C7  | P10643 | LTPLYELVK            | +2y7  | 538.32  | 861.51  | 70.4  |
| 1587 | C7  | P10643 | LTPLYELVK            | +2y6  | 538.32  | 764.46  | 70.4  |



|      |      |        |                  |       |        |         |      |
|------|------|--------|------------------|-------|--------|---------|------|
| 1588 | C7   | P10643 | LTPLYELVK        | +2y5  | 538.32 | 651.37  | 70.4 |
| 1589 | C7   | P10643 | LTPLYELVK        | +2y4  | 538.32 | 488.31  | 70.4 |
| 1590 | C7   | P10643 | LTPLYELVK        | +2y3  | 538.32 | 359.27  | 70.4 |
| 1591 | CA2  | P00918 | GGPLDGTyr        | +2y7  | 468.23 | 821.42  | 65.3 |
| 1592 | CA2  | P00918 | GGPLDGTyr        | +2y6  | 468.23 | 724.36  | 65.3 |
| 1593 | CA2  | P00918 | GGPLDGTyr        | +2y5  | 468.23 | 611.28  | 65.3 |
| 1594 | CA2  | P00918 | GGPLDGTyr        | +2y4  | 468.23 | 496.25  | 65.3 |
| 1595 | CA2  | P00918 | GGPLDGTyr        | +2y2  | 468.23 | 338.18  | 65.3 |
| 1596 | CA2  | P00918 | AVQQPDGLAVLGIFLK | +2y12 | 834.99 | 1242.75 | 92   |
| 1597 | CA2  | P00918 | AVQQPDGLAVLGIFLK | +2y8  | 834.99 | 860.56  | 92   |
| 1598 | CA2  | P00918 | AVQQPDGLAVLGIFLK | +2y6  | 834.99 | 690.45  | 92   |
| 1599 | CA2  | P00918 | AVQQPDGLAVLGIFLK | +2y5  | 834.99 | 577.37  | 92   |
| 1600 | CA2  | P00918 | AVQQPDGLAVLGIFLK | +2y3  | 834.99 | 407.27  | 92   |
| 1601 | CA2  | P00918 | VGSAKPLQK        | +2y9  | 492.80 | 885.52  | 67   |
| 1602 | CA2  | P00918 | VGSAKPLQK        | +2y8  | 492.80 | 828.49  | 67   |
| 1603 | CA2  | P00918 | VGSAKPLQK        | +2y7  | 492.80 | 741.46  | 67   |
| 1604 | CA2  | P00918 | VGSAKPLQK        | +2y6  | 492.80 | 670.42  | 67   |
| 1605 | CA2  | P00918 | VGSAKPLQK        | +2y5  | 492.80 | 542.33  | 67   |
| 1606 | CA2  | P00918 | VVDVLSIK         | +2y7  | 494.29 | 789.44  | 67.2 |
| 1607 | CA2  | P00918 | VVDVLSIK         | +2y6  | 494.29 | 674.41  | 67.2 |
| 1608 | CA2  | P00918 | VVDVLSIK         | +2y5  | 494.29 | 575.34  | 67.2 |
| 1609 | CA2  | P00918 | VVDVLSIK         | +2y4  | 494.29 | 462.26  | 67.2 |
| 1610 | CA2  | P00918 | VVDVLSIK         | +2y3  | 494.29 | 347.23  | 67.2 |
| 1611 | CA2  | P00918 | SADFTNFDPR       | +2y8  | 585.26 | 1011.45 | 73.8 |
| 1612 | CA2  | P00918 | SADFTNFDPR       | +2y7  | 585.26 | 896.43  | 73.8 |
| 1613 | CA2  | P00918 | SADFTNFDPR       | +2y6  | 585.26 | 749.36  | 73.8 |
| 1614 | CA2  | P00918 | SADFTNFDPR       | +2y5  | 585.26 | 648.31  | 73.8 |
| 1615 | CA2  | P00918 | SADFTNFDPR       | +2y3  | 585.26 | 387.20  | 73.8 |
| 1616 | LRP2 | E9PC35 | VFWTDTVQNK       | +2y8  | 619.31 | 991.48  | 76.3 |
| 1617 | LRP2 | E9PC35 | VFWTDTVQNK       | +2y7  | 619.31 | 805.41  | 76.3 |
| 1618 | LRP2 | E9PC35 | VFWTDTVQNK       | +2y6  | 619.31 | 704.36  | 76.3 |
| 1619 | LRP2 | E9PC35 | VFWTDTVQNK       | +2y5  | 619.31 | 589.33  | 76.3 |
| 1620 | LRP2 | E9PC35 | VFWTDTVQNK       | +2y3  | 619.31 | 389.21  | 76.3 |
| 1621 | LRP2 | E9PC35 | TDNDGLGFR        | +2y7  | 497.73 | 778.38  | 67.4 |
| 1622 | LRP2 | E9PC35 | TDNDGLGFR        | +2y6  | 497.73 | 664.34  | 67.4 |
| 1623 | LRP2 | E9PC35 | TDNDGLGFR        | +2y5  | 497.73 | 549.31  | 67.4 |
| 1624 | LRP2 | E9PC35 | TDNDGLGFR        | +2y3  | 497.73 | 379.21  | 67.4 |
| 1625 | LRP2 | E9PC35 | TDNDGLGFR        | +2y2  | 497.73 | 322.19  | 67.4 |
| 1626 | LRP2 | E9PC35 | VENVESLAFDWISK   | +2y10 | 818.91 | 1195.60 | 90.8 |
| 1627 | LRP2 | E9PC35 | VENVESLAFDWISK   | +2y9  | 818.91 | 1066.56 | 90.8 |
| 1628 | LRP2 | E9PC35 | VENVESLAFDWISK   | +2y7  | 818.91 | 866.44  | 90.8 |
| 1629 | LRP2 | E9PC35 | VENVESLAFDWISK   | +2y6  | 818.91 | 795.40  | 90.8 |
| 1630 | LRP2 | E9PC35 | VENVESLAFDWISK   | +2y5  | 818.91 | 648.34  | 90.8 |
| 1631 | LRP2 | E9PC35 | TVVQYLNNPR       | +2y8  | 602.33 | 1003.53 | 75   |
| 1632 | LRP2 | E9PC35 | TVVQYLNNPR       | +2y7  | 602.33 | 904.46  | 75   |
| 1633 | LRP2 | E9PC35 | TVVQYLNNPR       | +2y6  | 602.33 | 776.40  | 75   |
| 1634 | LRP2 | E9PC35 | TVVQYLNNPR       | +2y4  | 602.33 | 500.26  | 75   |
| 1635 | LRP2 | E9PC35 | TVVQYLNNPR       | +2y3  | 602.33 | 386.21  | 75   |
| 1636 | LRP2 | E9PC35 | LYWVDAYFDK       | +2y8  | 660.32 | 1043.48 | 79.3 |
| 1637 | LRP2 | E9PC35 | LYWVDAYFDK       | +2y7  | 660.32 | 857.40  | 79.3 |

|      |      |        |                     |       |        |         |      |
|------|------|--------|---------------------|-------|--------|---------|------|
| 1638 | LRP2 | E9PC35 | LYWVDAYFDK          | +2y6  | 660.32 | 758.34  | 79.3 |
| 1639 | LRP2 | E9PC35 | LYWVDAYFDK          | +2y5  | 660.32 | 643.31  | 79.3 |
| 1640 | LRP2 | E9PC35 | LYWVDAYFDK          | +2y4  | 660.32 | 572.27  | 79.3 |
| 1641 | KRT2 | P35908 | FLEQQNQVLQTK        | +2y8  | 738.40 | 958.53  | 84.9 |
| 1642 | KRT2 | P35908 | FLEQQNQVLQTK        | +2y7  | 738.40 | 830.47  | 84.9 |
| 1643 | KRT2 | P35908 | FLEQQNQVLQTK        | +2y5  | 738.40 | 588.37  | 84.9 |
| 1644 | KRT2 | P35908 | FLEQQNQVLQTK        | +2y4  | 738.40 | 489.30  | 84.9 |
| 1645 | KRT2 | P35908 | FLEQQNQVLQTK        | +2y3  | 738.40 | 376.22  | 84.9 |
| 1646 | KRT2 | P35908 | LALDVEIATYR         | +2y8  | 632.35 | 966.49  | 77.2 |
| 1647 | KRT2 | P35908 | LALDVEIATYR         | +2y7  | 632.35 | 851.46  | 77.2 |
| 1648 | KRT2 | P35908 | LALDVEIATYR         | +2y6  | 632.35 | 752.39  | 77.2 |
| 1649 | KRT2 | P35908 | LALDVEIATYR         | +2y5  | 632.35 | 623.35  | 77.2 |
| 1650 | KRT2 | P35908 | LALDVEIATYR         | +2y4  | 632.35 | 510.27  | 77.2 |
| 1651 | KRT2 | P35908 | GSSSGGGYSSGSYGS GGR | +2y12 | 870.86 | 1088.46 | 94.6 |
| 1652 | KRT2 | P35908 | GSSSGGGYSSGSYGS GGR | +2y11 | 870.86 | 1001.43 | 94.6 |
| 1653 | KRT2 | P35908 | GSSSGGGYSSGSYGS GGR | +2y10 | 870.86 | 914.40  | 94.6 |
| 1654 | KRT2 | P35908 | GSSSGGGYSSGSYGS GGR | +2y8  | 870.86 | 770.34  | 94.6 |
| 1655 | KRT2 | P35908 | GSSSGGGYSSGSYGS GGR | +2y5  | 870.86 | 433.22  | 94.6 |
| 1656 | KRT2 | P35908 | GGSSSGGGYGSGGGSSSVK | +2y15 | 794.85 | 1213.54 | 89.1 |
| 1657 | KRT2 | P35908 | GGSSSGGGYGSGGGSSSVK | +2y14 | 794.85 | 1156.52 | 89.1 |
| 1658 | KRT2 | P35908 | GGSSSGGGYGSGGGSSSVK | +2y12 | 794.85 | 1042.48 | 89.1 |
| 1659 | KRT2 | P35908 | GGSSSGGGYGSGGGSSSVK | +2y11 | 794.85 | 879.42  | 89.1 |
| 1660 | KRT2 | P35908 | GGSSSGGGYGSGGGSSSVK | +2y9  | 794.85 | 735.36  | 89.1 |
| 1661 | KRT2 | P35908 | GSSGEAFGSSVTF SFR   | +2y10 | 811.88 | 1134.56 | 90.3 |
| 1662 | KRT2 | P35908 | GSSGEAFGSSVTF SFR   | +2y9  | 811.88 | 987.49  | 90.3 |
| 1663 | KRT2 | P35908 | GSSGEAFGSSVTF SFR   | +2y8  | 811.88 | 930.47  | 90.3 |
| 1664 | KRT2 | P35908 | GSSGEAFGSSVTF SFR   | +2y5  | 811.88 | 657.34  | 90.3 |
| 1665 | KRT2 | P35908 | GSSGEAFGSSVTF SFR   | +2y3  | 811.88 | 409.22  | 90.3 |
| 1666 | LUM  | P51884 | SLEYLDLSFNQIAR      | +2y9  | 834.93 | 1063.55 | 92   |
| 1667 | LUM  | P51884 | SLEYLDLSFNQIAR      | +2y8  | 834.93 | 948.53  | 92   |
| 1668 | LUM  | P51884 | SLEYLDLSFNQIAR      | +2y7  | 834.93 | 835.44  | 92   |
| 1669 | LUM  | P51884 | SLEYLDLSFNQIAR      | +2y6  | 834.93 | 748.41  | 92   |
| 1670 | LUM  | P51884 | SLEYLDLSFNQIAR      | +2y5  | 834.93 | 601.34  | 92   |
| 1671 | LUM  | P51884 | ISNIPDEYFK          | +2y9  | 613.31 | 1112.53 | 75.8 |
| 1672 | LUM  | P51884 | ISNIPDEYFK          | +2y8  | 613.31 | 1025.49 | 75.8 |
| 1673 | LUM  | P51884 | ISNIPDEYFK          | +2y6  | 613.31 | 798.37  | 75.8 |
| 1674 | LUM  | P51884 | ISNIPDEYFK          | +2y4  | 613.31 | 586.29  | 75.8 |
| 1675 | LUM  | P51884 | ISNIPDEYFK          | +2y3  | 613.31 | 457.24  | 75.8 |
| 1676 | LUM  | P51884 | FNALQYLR            | +2y7  | 512.78 | 877.49  | 68.5 |
| 1677 | LUM  | P51884 | FNALQYLR            | +2y6  | 512.78 | 763.45  | 68.5 |
| 1678 | LUM  | P51884 | FNALQYLR            | +2y5  | 512.78 | 692.41  | 68.5 |
| 1679 | LUM  | P51884 | FNALQYLR            | +2y4  | 512.78 | 579.32  | 68.5 |
| 1680 | LUM  | P51884 | FNALQYLR            | +2y3  | 512.78 | 451.27  | 68.5 |
| 1681 | LUM  | P51884 | ILGPLSYSK           | +2y8  | 489.29 | 864.48  | 66.8 |
| 1682 | LUM  | P51884 | ILGPLSYSK           | +2y7  | 489.29 | 751.40  | 66.8 |
| 1683 | LUM  | P51884 | ILGPLSYSK           | +2y6  | 489.29 | 694.38  | 66.8 |
| 1684 | LUM  | P51884 | ILGPLSYSK           | +2y4  | 489.29 | 484.24  | 66.8 |
| 1685 | LUM  | P51884 | ILGPLSYSK           | +2y3  | 489.29 | 397.21  | 66.8 |
| 1686 | LUM  | P51884 | VANEVTLN            | +2y6  | 430.23 | 689.35  | 62.5 |
| 1687 | LUM  | P51884 | VANEVTLN            | +2y5  | 430.23 | 575.30  | 62.5 |

|      |          |        |                      |       |         |         |       |
|------|----------|--------|----------------------|-------|---------|---------|-------|
| 1688 | LUM      | P51884 | VANEVTLN             | +2y4  | 430.23  | 446.26  | 62.5  |
| 1689 | LUM      | P51884 | VANEVTLN             | +2y3  | 430.23  | 347.19  | 62.5  |
| 1690 | NPC2     | G3V2V8 | TYSYLNK              | +2y6  | 444.73  | 787.40  | 63.5  |
| 1691 | NPC2     | G3V2V8 | TYSYLNK              | +2y5  | 444.73  | 624.34  | 63.5  |
| 1692 | NPC2     | G3V2V8 | TYSYLNK              | +2y4  | 444.73  | 537.30  | 63.5  |
| 1693 | NPC2     | G3V2V8 | TYSYLNK              | +2y3  | 444.73  | 374.24  | 63.5  |
| 1694 | IGFBP7   | Q16270 | TELLPGDR             | +2y6  | 450.74  | 670.39  | 64    |
| 1695 | IGFBP7   | Q16270 | TELLPGDR             | +2y5  | 450.74  | 557.30  | 64    |
| 1696 | IGFBP7   | Q16270 | TELLPGDR             | +2y4  | 450.74  | 444.22  | 64    |
| 1697 | IGFBP7   | Q16270 | TELLPGDR             | +2y3  | 450.74  | 347.17  | 64    |
| 1698 | IGFBP7   | Q16270 | DNLAIQTR             | +2y6  | 465.75  | 701.43  | 65.1  |
| 1699 | IGFBP7   | Q16270 | DNLAIQTR             | +2y5  | 465.75  | 588.35  | 65.1  |
| 1700 | IGFBP7   | Q16270 | DNLAIQTR             | +2y4  | 465.75  | 517.31  | 65.1  |
| 1701 | IGFBP7   | Q16270 | DNLAIQTR             | +2y3  | 465.75  | 404.23  | 65.1  |
| 1702 | SERPING1 | P05155 | TNLESILSYPK          | +2y9  | 632.84  | 1049.59 | 77.3  |
| 1703 | SERPING1 | P05155 | TNLESILSYPK          | +2y8  | 632.84  | 936.50  | 77.3  |
| 1704 | SERPING1 | P05155 | TNLESILSYPK          | +2y7  | 632.84  | 807.46  | 77.3  |
| 1705 | SERPING1 | P05155 | TNLESILSYPK          | +2y5  | 632.84  | 607.34  | 77.3  |
| 1706 | SERPING1 | P05155 | TNLESILSYPK          | +2y4  | 632.84  | 494.26  | 77.3  |
| 1707 | SERPING1 | P05155 | VLSNNSDANLELINTWVAK  | +2y11 | 1051.05 | 1300.73 | 107.7 |
| 1708 | SERPING1 | P05155 | VLSNNSDANLELINTWVAK  | +2y9  | 1051.05 | 1073.60 | 107.7 |
| 1709 | SERPING1 | P05155 | VLSNNSDANLELINTWVAK  | +2y8  | 1051.05 | 944.56  | 107.7 |
| 1710 | SERPING1 | P05155 | VLSNNSDANLELINTWVAK  | +2y7  | 1051.05 | 831.47  | 107.7 |
| 1711 | SERPING1 | P05155 | VLSNNSDANLELINTWVAK  | +2y6  | 1051.05 | 718.39  | 107.7 |
| 1712 | SERPING1 | P05155 | LLDSLPSDTR           | +2y9  | 558.80  | 1003.51 | 71.9  |
| 1713 | SERPING1 | P05155 | LLDSLPSDTR           | +2y8  | 558.80  | 890.42  | 71.9  |
| 1714 | SERPING1 | P05155 | LLDSLPSDTR           | +2y7  | 558.80  | 775.39  | 71.9  |
| 1715 | SERPING1 | P05155 | LLDSLPSDTR           | +2y6  | 558.80  | 688.36  | 71.9  |
| 1716 | SERPING1 | P05155 | LLDSLPSDTR           | +2y5  | 558.80  | 575.28  | 71.9  |
| 1717 | SERPING1 | P05155 | LVLLNAIYLSAK         | +2y10 | 659.41  | 1105.66 | 79.2  |
| 1718 | SERPING1 | P05155 | LVLLNAIYLSAK         | +2y9  | 659.41  | 992.58  | 79.2  |
| 1719 | SERPING1 | P05155 | LVLLNAIYLSAK         | +2y8  | 659.41  | 879.49  | 79.2  |
| 1720 | SERPING1 | P05155 | LVLLNAIYLSAK         | +2y7  | 659.41  | 765.45  | 79.2  |
| 1721 | SERPING1 | P05155 | LVLLNAIYLSAK         | +2y5  | 659.41  | 581.33  | 79.2  |
| 1722 | SERPING1 | P05155 | FQPTLLTLPR           | +2y8  | 593.35  | 910.57  | 74.4  |
| 1723 | SERPING1 | P05155 | FQPTLLTLPR           | +2y7  | 593.35  | 813.52  | 74.4  |
| 1724 | SERPING1 | P05155 | FQPTLLTLPR           | +2y6  | 593.35  | 712.47  | 74.4  |
| 1725 | SERPING1 | P05155 | FQPTLLTLPR           | +2y5  | 593.35  | 599.39  | 74.4  |
| 1726 | SERPING1 | P05155 | FQPTLLTLPR           | +2y4  | 593.35  | 486.30  | 74.4  |
| 1727 | SPARCL1  | Q14515 | SSSQELGLK            | +2y7  | 474.75  | 774.44  | 65.7  |
| 1728 | SPARCL1  | Q14515 | SSSQELGLK            | +2y6  | 474.75  | 687.40  | 65.7  |
| 1729 | SPARCL1  | Q14515 | SSSQELGLK            | +2y5  | 474.75  | 559.34  | 65.7  |
| 1730 | SPARCL1  | Q14515 | SSSQELGLK            | +2y4  | 474.75  | 430.30  | 65.7  |
| 1731 | SPARCL1  | Q14515 | SSSQELGLK            | +2y3  | 474.75  | 317.22  | 65.7  |
| 1732 | SPARCL1  | Q14515 | DQGNQE QDPNISNGEEEEK | +2y12 | 1144.97 | 1374.60 | 114.6 |
| 1733 | SPARCL1  | Q14515 | DQGNQE QDPNISNGEEEEK | +2y9  | 1144.97 | 1050.42 | 114.6 |
| 1734 | SPARCL1  | Q14515 | DQGNQE QDPNISNGEEEEK | +2y8  | 1144.97 | 963.39  | 114.6 |
| 1735 | SPARCL1  | Q14515 | DQGNQE QDPNISNGEEEEK | +2y7  | 1144.97 | 849.35  | 114.6 |
| 1736 | SPARCL1  | Q14515 | DQGNQE QDPNISNGEEEEK | +2y5  | 1144.97 | 663.28  | 114.6 |
| 1737 | SPARCL1  | Q14515 | EEDIDENLLF           | +2y7  | 618.79  | 863.45  | 76.2  |

|      |         |        |                      |       |        |         |       |
|------|---------|--------|----------------------|-------|--------|---------|-------|
| 1738 | SPARCL1 | Q14515 | EEDIDENLLF           | +2y6  | 618.79 | 750.37  | 76.2  |
| 1739 | SPARCL1 | Q14515 | EEDIDENLLF           | +2y5  | 618.79 | 635.34  | 76.2  |
| 1740 | SPARCL1 | Q14515 | EEDIDENLLF           | +2y4  | 618.79 | 506.30  | 76.2  |
| 1741 | SPARCL1 | Q14515 | EEDIDENLLF           | +2y3  | 618.79 | 392.25  | 76.2  |
| 1742 | BTD     | P43251 | VDLITFDTPFAGR        | +2y9  | 726.38 | 1011.49 | 84.1  |
| 1743 | BTD     | P43251 | VDLITFDTPFAGR        | +2y8  | 726.38 | 910.44  | 84.1  |
| 1744 | BTD     | P43251 | VDLITFDTPFAGR        | +2y7  | 726.38 | 763.37  | 84.1  |
| 1745 | BTD     | P43251 | VDLITFDTPFAGR        | +2y6  | 726.38 | 648.35  | 84.1  |
| 1746 | BTD     | P43251 | VDLITFDTPFAGR        | +2y5  | 726.38 | 547.30  | 84.1  |
| 1747 | BTD     | P43251 | LSSGLVTAALYGR        | +2y8  | 654.37 | 850.48  | 78.8  |
| 1748 | BTD     | P43251 | LSSGLVTAALYGR        | +2y7  | 654.37 | 751.41  | 78.8  |
| 1749 | BTD     | P43251 | LSSGLVTAALYGR        | +2y6  | 654.37 | 650.36  | 78.8  |
| 1750 | BTD     | P43251 | LSSGLVTAALYGR        | +2y5  | 654.37 | 579.32  | 78.8  |
| 1751 | BTD     | P43251 | LSSGLVTAALYGR        | +2y3  | 654.37 | 395.20  | 78.8  |
| 1752 | B3GNT1  | O43505 | TALASGGVLDASGDYR     | +2y12 | 776.88 | 1196.55 | 87.8  |
| 1753 | B3GNT1  | O43505 | TALASGGVLDASGDYR     | +2y8  | 776.88 | 896.41  | 87.8  |
| 1754 | B3GNT1  | O43505 | TALASGGVLDASGDYR     | +2y6  | 776.88 | 668.30  | 87.8  |
| 1755 | B3GNT1  | O43505 | TALASGGVLDASGDYR     | +2y5  | 776.88 | 597.26  | 87.8  |
| 1756 | B3GNT1  | O43505 | TALASGGVLDASGDYR     | +2y2  | 776.88 | 338.18  | 87.8  |
| 1757 | B3GNT1  | O43505 | WEGPLSVSVFAATK       | +2y12 | 746.40 | 1176.66 | 85.5  |
| 1758 | B3GNT1  | O43505 | WEGPLSVSVFAATK       | +2y11 | 746.40 | 1119.64 | 85.5  |
| 1759 | B3GNT1  | O43505 | WEGPLSVSVFAATK       | +2y9  | 746.40 | 909.50  | 85.5  |
| 1760 | B3GNT1  | O43505 | WEGPLSVSVFAATK       | +2y8  | 746.40 | 822.47  | 85.5  |
| 1761 | B3GNT1  | O43505 | WEGPLSVSVFAATK       | +2y7  | 746.40 | 723.40  | 85.5  |
| 1762 | B3GNT1  | O43505 | YEAAPDPR             | +2y7  | 509.25 | 725.39  | 68.2  |
| 1763 | B3GNT1  | O43505 | YEAAPDPR             | +2y6  | 509.25 | 654.36  | 68.2  |
| 1764 | B3GNT1  | O43505 | YEAAPDPR             | +2y5  | 509.25 | 583.32  | 68.2  |
| 1765 | B3GNT1  | O43505 | YEAAPDPR             | +2y4  | 509.25 | 484.25  | 68.2  |
| 1766 | B3GNT1  | O43505 | YEAAPDPR             | +2y3  | 509.25 | 387.20  | 68.2  |
| 1767 | B3GNT1  | O43505 | VPTFDER              | +2y6  | 432.22 | 764.36  | 62.6  |
| 1768 | B3GNT1  | O43505 | VPTFDER              | +2y5  | 432.22 | 667.30  | 62.6  |
| 1769 | B3GNT1  | O43505 | VPTFDER              | +2y4  | 432.22 | 566.26  | 62.6  |
| 1770 | B3GNT1  | O43505 | VPTFDER              | +2y3  | 432.22 | 419.19  | 62.6  |
| 1771 | B3GNT1  | O43505 | VPTFDER              | +2y2  | 432.22 | 304.16  | 62.6  |
| 1772 | B3GNT1  | O43505 | QYGFNR               | +2y5  | 392.69 | 656.32  | 59.7  |
| 1773 | B3GNT1  | O43505 | QYGFNR               | +2y4  | 392.69 | 493.25  | 59.7  |
| 1774 | B3GNT1  | O43505 | QYGFNR               | +2y3  | 392.69 | 436.23  | 59.7  |
| 1775 | PGLYRP2 | Q96PD5 | DGSPDVTTADIGANTPDATK | +2y14 | 973.45 | 1375.67 | 102.1 |
| 1776 | PGLYRP2 | Q96PD5 | DGSPDVTTADIGANTPDATK | +2y13 | 973.45 | 1274.62 | 102.1 |
| 1777 | PGLYRP2 | Q96PD5 | DGSPDVTTADIGANTPDATK | +2y11 | 973.45 | 1102.54 | 102.1 |
| 1778 | PGLYRP2 | Q96PD5 | DGSPDVTTADIGANTPDATK | +2y9  | 973.45 | 874.43  | 102.1 |
| 1779 | PGLYRP2 | Q96PD5 | DGSPDVTTADIGANTPDATK | +2y5  | 973.45 | 531.28  | 102.1 |
| 1780 | PGLYRP2 | Q96PD5 | TFTLLDPK             | +2y7  | 467.77 | 833.48  | 65.2  |
| 1781 | PGLYRP2 | Q96PD5 | TFTLLDPK             | +2y6  | 467.77 | 686.41  | 65.2  |
| 1782 | PGLYRP2 | Q96PD5 | TFTLLDPK             | +2y5  | 467.77 | 585.36  | 65.2  |
| 1783 | PGLYRP2 | Q96PD5 | TFTLLDPK             | +2y4  | 467.77 | 472.28  | 65.2  |
| 1784 | PGLYRP2 | Q96PD5 | TFTLLDPK             | +2y3  | 467.77 | 359.19  | 65.2  |
| 1785 | PGLYRP2 | Q96PD5 | WGAAPYR              | +2y6  | 410.71 | 634.33  | 61.1  |
| 1786 | PGLYRP2 | Q96PD5 | WGAAPYR              | +2y5  | 410.71 | 577.31  | 61.1  |
| 1787 | PGLYRP2 | Q96PD5 | WGAAPYR              | +2y4  | 410.71 | 506.27  | 61.1  |

|      |          |        |                   |       |        |         |       |
|------|----------|--------|-------------------|-------|--------|---------|-------|
| 1788 | PGLYRP2  | Q96PD5 | WGAAPYR           | +2y3  | 410.71 | 435.24  | 61.1  |
| 1789 | IGHG1    | P01857 | ALPAPIEK          | +2y7  | 419.76 | 767.47  | 61.7  |
| 1790 | IGHG1    | P01857 | ALPAPIEK          | +2y6  | 419.76 | 654.38  | 61.7  |
| 1791 | IGHG1    | P01857 | ALPAPIEK          | +2y5  | 419.76 | 557.33  | 61.7  |
| 1792 | IGHG1    | P01857 | ALPAPIEK          | +2y4  | 419.76 | 486.29  | 61.7  |
| 1793 | IGHG1    | P01857 | ALPAPIEK          | +2y3  | 419.76 | 389.24  | 61.7  |
| 1794 | IGHG1    | P01857 | EPQVYTLPPSR       | +2y8  | 643.84 | 932.52  | 78.1  |
| 1795 | IGHG1    | P01857 | EPQVYTLPPSR       | +2y7  | 643.84 | 833.45  | 78.1  |
| 1796 | IGHG1    | P01857 | EPQVYTLPPSR       | +2y6  | 643.84 | 670.39  | 78.1  |
| 1797 | IGHG1    | P01857 | EPQVYTLPPSR       | +2y5  | 643.84 | 569.34  | 78.1  |
| 1798 | IGHG1    | P01857 | EPQVYTLPPSR       | +2y4  | 643.84 | 456.26  | 78.1  |
| 1799 | IGHG1    | P01857 | TTPPVLDSDGSFFLYSK | +2y12 | 937.46 | 1378.65 | 99.5  |
| 1800 | IGHG1    | P01857 | TTPPVLDSDGSFFLYSK | +2y11 | 937.46 | 1265.57 | 99.5  |
| 1801 | IGHG1    | P01857 | TTPPVLDSDGSFFLYSK | +2y10 | 937.46 | 1150.54 | 99.5  |
| 1802 | IGHG1    | P01857 | TTPPVLDSDGSFFLYSK | +2y8  | 937.46 | 948.48  | 99.5  |
| 1803 | IGHG1    | P01857 | TTPPVLDSDGSFFLYSK | +2y3  | 937.46 | 397.21  | 99.5  |
| 1804 | CUTA     | O60888 | TQSSLVPALTDVFR    | +2y12 | 767.42 | 1304.72 | 87.1  |
| 1805 | CUTA     | O60888 | TQSSLVPALTDVFR    | +2y9  | 767.42 | 1017.57 | 87.1  |
| 1806 | CUTA     | O60888 | TQSSLVPALTDVFR    | +2y8  | 767.42 | 918.50  | 87.1  |
| 1807 | CUTA     | O60888 | TQSSLVPALTDVFR    | +2y5  | 767.42 | 637.33  | 87.1  |
| 1808 | CUTA     | O60888 | TQSSLVPALTDVFR    | +2y3  | 767.42 | 421.26  | 87.1  |
| 1809 | CUTA     | O60888 | QVTESVSDSITVLP    | +2y12 | 737.89 | 1247.64 | 84.9  |
| 1810 | CUTA     | O60888 | QVTESVSDSITVLP    | +2y8  | 737.89 | 831.45  | 84.9  |
| 1811 | CUTA     | O60888 | QVTESVSDSITVLP    | +2y6  | 737.89 | 629.39  | 84.9  |
| 1812 | CUTA     | O60888 | QVTESVSDSITVLP    | +2y4  | 737.89 | 429.27  | 84.9  |
| 1813 | OAF      | Q86UD1 | ALILGELEK         | +2y7  | 493.30 | 801.47  | 67.1  |
| 1814 | OAF      | Q86UD1 | ALILGELEK         | +2y6  | 493.30 | 688.39  | 67.1  |
| 1815 | OAF      | Q86UD1 | ALILGELEK         | +2y5  | 493.30 | 575.30  | 67.1  |
| 1816 | OAF      | Q86UD1 | ALILGELEK         | +2y4  | 493.30 | 518.28  | 67.1  |
| 1817 | OAF      | Q86UD1 | ALILGELEK         | +2y3  | 493.30 | 389.24  | 67.1  |
| 1818 | OAF      | Q86UD1 | FWLEQGVDSVFEALPK  | +2y13 | 976.49 | 1376.71 | 102.3 |
| 1819 | OAF      | Q86UD1 | FWLEQGVDSVFEALPK  | +2y12 | 976.49 | 1248.65 | 102.3 |
| 1820 | OAF      | Q86UD1 | FWLEQGVDSVFEALPK  | +2y11 | 976.49 | 1191.63 | 102.3 |
| 1821 | OAF      | Q86UD1 | FWLEQGVDSVFEALPK  | +2y10 | 976.49 | 1092.56 | 102.3 |
| 1822 | OAF      | Q86UD1 | FWLEQGVDSVFEALPK  | +2y6  | 976.49 | 704.40  | 102.3 |
| 1823 | OAF      | Q86UD1 | ASEQAELPR         | +2y7  | 500.76 | 842.44  | 67.6  |
| 1824 | OAF      | Q86UD1 | ASEQAELPR         | +2y6  | 500.76 | 713.39  | 67.6  |
| 1825 | OAF      | Q86UD1 | ASEQAELPR         | +2y5  | 500.76 | 585.34  | 67.6  |
| 1826 | OAF      | Q86UD1 | ASEQAELPR         | +2y4  | 500.76 | 514.30  | 67.6  |
| 1827 | OAF      | Q86UD1 | ASEQAELPR         | +2y3  | 500.76 | 385.26  | 67.6  |
| 1828 | OAF      | Q86UD1 | SYSFDFYVPQR       | +2y7  | 704.83 | 924.46  | 82.5  |
| 1829 | OAF      | Q86UD1 | SYSFDFYVPQR       | +2y6  | 704.83 | 809.43  | 82.5  |
| 1830 | OAF      | Q86UD1 | SYSFDFYVPQR       | +2y5  | 704.83 | 662.36  | 82.5  |
| 1831 | OAF      | Q86UD1 | SYSFDFYVPQR       | +2y4  | 704.83 | 499.30  | 82.5  |
| 1832 | OAF      | Q86UD1 | SYSFDFYVPQR       | +2y3  | 704.83 | 400.23  | 82.5  |
| 1833 | SERPINI1 | Q99574 | QEVPLATLEPLVK     | +2y11 | 718.92 | 1179.73 | 83.5  |
| 1834 | SERPINI1 | Q99574 | QEVPLATLEPLVK     | +2y10 | 718.92 | 1080.67 | 83.5  |
| 1835 | SERPINI1 | Q99574 | QEVPLATLEPLVK     | +2y8  | 718.92 | 870.53  | 83.5  |
| 1836 | SERPINI1 | Q99574 | QEVPLATLEPLVK     | +2y7  | 718.92 | 799.49  | 83.5  |
| 1837 | SERPINI1 | Q99574 | QEVPLATLEPLVK     | +2y4  | 718.92 | 456.32  | 83.5  |

|      |          |        |               |       |        |         |      |
|------|----------|--------|---------------|-------|--------|---------|------|
| 1838 | SERPINI1 | Q99574 | AQLVEEWANSVK  | +2y10 | 687.36 | 1174.61 | 81.2 |
| 1839 | SERPINI1 | Q99574 | AQLVEEWANSVK  | +2y9  | 687.36 | 1061.53 | 81.2 |
| 1840 | SERPINI1 | Q99574 | AQLVEEWANSVK  | +2y8  | 687.36 | 962.46  | 81.2 |
| 1841 | SERPINI1 | Q99574 | AQLVEEWANSVK  | +2y7  | 687.36 | 833.42  | 81.2 |
| 1842 | SERPINI1 | Q99574 | AQLVEEWANSVK  | +2y6  | 687.36 | 704.37  | 81.2 |
| 1843 | SERPINI1 | Q99574 | ALGITEIFIK    | +2y8  | 552.84 | 920.55  | 71.4 |
| 1844 | SERPINI1 | Q99574 | ALGITEIFIK    | +2y7  | 552.84 | 863.52  | 71.4 |
| 1845 | SERPINI1 | Q99574 | ALGITEIFIK    | +2y6  | 552.84 | 750.44  | 71.4 |
| 1846 | SERPINI1 | Q99574 | ALGITEIFIK    | +2y5  | 552.84 | 649.39  | 71.4 |
| 1847 | SERPINI1 | Q99574 | ALGITEIFIK    | +2y3  | 552.84 | 407.27  | 71.4 |
| 1848 | RTBDN    | K7EKV3 | SQQHHGLAADLGK | +2y10 | 681.35 | 1018.54 | 80.8 |
| 1849 | RTBDN    | K7EKV3 | SQQHHGLAADLGK | +2y9  | 681.35 | 881.48  | 80.8 |
| 1850 | RTBDN    | K7EKV3 | SQQHHGLAADLGK | +2y8  | 681.35 | 744.43  | 80.8 |
| 1851 | RTBDN    | K7EKV3 | SQQHHGLAADLGK | +2y7  | 681.35 | 687.40  | 80.8 |
| 1852 | RTBDN    | K7EKV3 | SQQHHGLAADLGK | +2y6  | 681.35 | 574.32  | 80.8 |
| 1853 | RTBDN    | K7EKV3 | SQQHHGLAADLGK | +2y5  | 681.35 | 503.28  | 80.8 |
| 1854 | FRZB     | Q92765 | NNYNYVIR      | +2y6  | 528.27 | 827.44  | 69.6 |
| 1855 | FRZB     | Q92765 | NNYNYVIR      | +2y5  | 528.27 | 664.38  | 69.6 |
| 1856 | FRZB     | Q92765 | NNYNYVIR      | +2y4  | 528.27 | 550.33  | 69.6 |
| 1857 | FRZB     | Q92765 | NNYNYVIR      | +2y3  | 528.27 | 387.27  | 69.6 |
| 1858 | FRZB     | Q92765 | SSLVNIPR      | +2y6  | 443.26 | 711.45  | 63.4 |
| 1859 | FRZB     | Q92765 | SSLVNIPR      | +2y5  | 443.26 | 598.37  | 63.4 |
| 1860 | FRZB     | Q92765 | SSLVNIPR      | +2y4  | 443.26 | 499.30  | 63.4 |
| 1861 | FRZB     | Q92765 | SSLVNIPR      | +2y3  | 443.26 | 385.26  | 63.4 |
| 1862 | FRZB     | Q92765 | LLLVEGSIAEK   | +2y9  | 586.35 | 945.53  | 73.9 |
| 1863 | FRZB     | Q92765 | LLLVEGSIAEK   | +2y8  | 586.35 | 832.44  | 73.9 |
| 1864 | FRZB     | Q92765 | LLLVEGSIAEK   | +2y7  | 586.35 | 733.37  | 73.9 |
| 1865 | FRZB     | Q92765 | LLLVEGSIAEK   | +2y6  | 586.35 | 604.33  | 73.9 |
| 1866 | FRZB     | Q92765 | LLLVEGSIAEK   | +2y5  | 586.35 | 547.31  | 73.9 |
| 1867 | WIF1     | Q9Y5W5 | QHTPSLK       | +2y6  | 405.73 | 682.39  | 60.7 |
| 1868 | WIF1     | Q9Y5W5 | QHTPSLK       | +2y5  | 405.73 | 545.33  | 60.7 |
| 1869 | WIF1     | Q9Y5W5 | QHTPSLK       | +2y4  | 405.73 | 444.28  | 60.7 |
| 1870 | WIF1     | Q9Y5W5 | QHTPSLK       | +2y3  | 405.73 | 347.23  | 60.7 |

---

| CE <sup>f)</sup> | MASCOT <sup>g)</sup> |
|------------------|----------------------|
| 35.9             | X                    |
| 22.2             | X                    |
| 22.2             | X                    |
| 22.2             | X                    |
| 46.6             | O                    |
| 32.1             | O                    |
| 27.9             | X                    |
| 41.7             | X                    |
| 50.9             | X                    |
| 31.5             | X                    |

|      |   |
|------|---|
| 31.5 | X |
| 20.7 | X |
| 35.3 | X |
| 49.9 | X |
| 20.8 | X |
| 25.6 | X |
| 27.4 | X |
| 19.1 | X |
| 31.8 | O |
| 20.6 | O |
| 18.7 | X |
| 18.7 | X |
| 18.7 | X |
| 26.8 | X |



[illegible]

|      |   |
|------|---|
| 40.4 | O |
| 57.4 | X |
| 23.5 | X |
| 26   | X |
| 61.2 | X |
| 50.1 | X |
| 30.4 | X |
| 42.4 | X |
| 35.9 | X |
| 32.5 | X |
| 26.8 | O |
| 26.8 | O |

|      |   |
|------|---|
| 26.8 | O |
| 26.8 | O |
| 26.8 | O |
| 23.8 | O |
| 50.2 | X |
| 57.5 | X |
| 24.3 | O |
| 33.8 | O |
| 57.1 | X |
| 38.9 | X |
| 32.6 | X |
| 20.9 | X |
| 27.6 | X |
| 27.6 | X |

|      |   |
|------|---|
| 27.6 | X |
| 27.6 | X |
| 27.6 | X |
| 49.7 | X |
| 30.6 | X |
| 24.8 | X |
| 46.3 | X |
| 28.3 | X |
| 23.5 | X |
| 40.3 | O |
| 29.8 | O |
| 31.4 | X |
| 20.7 | X |
| 20.7 | X |
| 20.7 | X |

[illegible]

|      |   |
|------|---|
| 29.9 | X |
| 28   | X |
| 46.8 | X |
| 18.4 | X |
| 49.6 | X |
| 27.9 | O |
| 22.8 | X |
| 44.6 | X |
| 19.5 | X |
| 26.9 | X |
| 57.8 | X |
| 57.8 | X |
| 57.8 | X |

|      |   |
|------|---|
| 57.8 | X |
| 57.8 | X |
| 36.5 | O |
| 21.7 | X |
| 23.5 | O |
| 22.6 | O |
| 54.1 | X |
| 24.9 | O |
| 43   | O |
| 41.9 | X |
| 58.6 | X |

[illegible]



|      |   |
|------|---|
| 28.1 | X |
| 60.3 | X |
| 23.1 | X |
| 25.5 | X |
| 39.1 | O |
| 25.1 | O |
| 40.6 | X |
| 29.7 | X |
| 53   | X |
| 44.9 | X |
| 16.4 | O |
| 33.4 | X |
| 33.4 | X |

|      |   |
|------|---|
| 33.4 | X |
| 33.4 | X |
| 33.4 | X |
| 48.1 | X |
| 17.4 | X |
| 23.3 | X |
| 32.1 | X |
| 38.8 | X |
| 21.4 | X |
| 27.9 | X |
| 18.9 | X |
| 39.4 | X |
| 40.4 | X |

[illegible]

|      |   |
|------|---|
| 52.9 | O |
| 37.7 | X |
| 40.3 | X |
| 20   | O |
| 20   | O |
| 20   | O |
| 20.7 | X |
| 25.1 | O |
| 28.3 | X |
| 21.4 | X |
| 29.9 | O |
| 29   | X |
| 49.2 | O |

[illegible]

[illegible]

|      |   |
|------|---|
| 23   | X |
| 23   | X |
| 21.9 | X |
| 33   | X |
| 39.1 | X |
| 30.1 | X |
| 50   | X |
| 31.1 | X |
| 30.7 | X |
| 25.8 | O |
| 40.3 | X |
| 53.9 | X |
| 53.9 | X |
| 53.9 | X |

|      |   |
|------|---|
| 53.9 | X |
| 53.9 | X |
| 39.7 | O |
| 36.7 | X |
| 41.4 | X |
| 37.9 | X |
| 40.6 | X |
| 46.1 | X |
| 21.9 | X |
| 46.2 | X |
| 23.7 | X |
| 33.1 | X |



|      |   |
|------|---|
| 33.1 | X |
| 31.1 | X |
| 25.2 | X |
| 25.2 | X |
| 52.6 | X |
| 59.4 | X |
| 41.2 | X |
| 50.3 | X |
| 50.7 | O |
| 28.8 | O |
| 50.5 | X |
| 24.1 | O |
| 44.5 | X |
| 44.5 | X |

|      |   |
|------|---|
| 44.5 | X |
| 44.5 | X |
| 44.5 | X |
| 27.5 | X |
| 35.3 | X |
| 34.5 | X |
| 38.7 | X |
| 44.1 | X |
| 25   | X |
| 24.9 | O |
| 35.9 | X |
| 26.3 | X |
| 35.5 | O |
| 35.5 | O |

|      |   |
|------|---|
| 35.5 | O |
| 35.5 | O |
| 35.5 | O |
| 32.5 | X |
| 43.8 | X |
| 49.2 | O |
| 39.8 | X |
| 37.2 | X |
| 33   | X |
| 38.4 | X |
| 28.4 | X |
| 32.4 | X |
| 34.2 | X |
| 34.2 | X |

|      |   |
|------|---|
| 34.2 | X |
| 34.2 | X |
| 34.2 | X |
| 41.2 | X |
| 34.4 | X |
| 35.9 | X |
| 57.4 | X |
| 39.8 | X |
| 24.6 | X |
| 40.2 | X |
| 48.7 | X |
| 24.4 | X |
| 32.8 | X |

[illegible]

|      |   |
|------|---|
| 52.3 | X |
| 39.6 | X |
| 30.5 | X |
| 40.4 | X |
| 27.2 | X |
| 24.6 | X |
| 36.5 | X |
| 18.9 | X |
| 29.4 | O |
| 23.4 | X |
| 24   | X |
| 24   | X |

|      |   |
|------|---|
| 24   | X |
| 24   | X |
| 24   | X |
| 21.4 | X |
| 27.2 | X |
| 21.1 | X |
| 36.1 | X |
| 48.1 | X |
| 37.5 | X |
| 39.7 | X |
| 22.3 | X |
| 30.4 | X |
| 21.3 | X |
| 21.3 | X |
| 21.3 | X |

|      |   |
|------|---|
| 21.3 | X |
| 48.1 | X |
| 41.6 | X |
| 44.7 | X |
| 29.9 | X |
| 21.4 | X |
| 56.7 | X |
| 19.8 | O |
| 45.1 | O |
| 21   | X |
| 38.5 | X |
| 27.5 | X |
| 27.5 | X |



|      |   |
|------|---|
| 27.5 | X |
| 27.5 | X |
| 27.5 | X |
| 23.4 | X |
| 38   | X |
| 38.3 | O |
| 38   | X |
| 23.2 | X |
| 33.2 | X |
| 40.4 | X |
| 20.2 | X |
| 53.8 | X |
| 42.3 | X |

[illegible]

|      |   |
|------|---|
| 26.1 | O |
| 44.7 | X |
| 32.2 | X |
| 26.9 | X |
| 33.1 | X |
| 21.3 | X |
| 22   | O |
| 32.5 | X |
| 20.2 | X |
| 20.2 | X |
| 20.2 | X |
| 32.1 | O |
| 35.1 | X |

|      |   |
|------|---|
| 35.1 | X |
| 27.8 | X |
| 43.7 | X |
| 30.8 | X |
| 38.2 | X |
| 47.8 | X |
| 20.2 | X |
| 47   | X |
| 52   | X |
| 28.3 | O |
| 21.8 | X |

|      |   |
|------|---|
| 21.8 | X |
| 14.2 | X |
| 14.2 | X |
| 14.2 | X |
| 21.1 | X |
| 33.7 | X |
| 21.1 | X |
| 42.7 | O |
| 36.3 | O |
| 47.4 | X |
| 28.8 | X |
| 36.8 | X |
| 24.5 | X |
| 29.8 | X |
| 29.8 | X |

|      |   |
|------|---|
| 29.8 | X |
| 29.8 | X |
| 29.8 | X |
| 58.1 | X |
| 30.7 | X |
| 53.1 | X |
| 25.1 | X |
| 37.3 | X |
| 61.4 | X |
| 28   | O |
| 47.2 | X |
| 26.4 | X |
| 26.4 | X |

|      |   |
|------|---|
| 26.4 | X |
| 26.4 | X |
| 26.4 | X |
| 22.4 | X |
| 43.3 | X |
| 23.8 | X |
| 23.9 | O |
| 29.1 | O |
| 31   | X |
| 24.1 | X |
| 42.4 | X |
| 30.1 | X |
| 33.4 | X |
| 33.4 | X |

|      |   |
|------|---|
| 33.4 | X |
| 33.4 | X |
| 33.4 | X |
| 37.8 | X |
| 31.8 | X |
| 45.4 | X |
| 41   | X |
| 42   | X |
| 43.3 | X |
| 30.7 | X |
| 25   | X |
| 23.6 | X |
| 20.3 | X |
| 20.3 | X |



[illegible]

|      |   |
|------|---|
| 31   | X |
| 37.1 | X |
| 33   | X |
| 40   | X |
| 38.3 | X |
| 24.8 | X |
| 20.4 | O |
| 18.1 | O |
| 18.1 | O |
| 18.1 | O |
| 51.2 | X |
| 22.4 | X |
| 19.1 | X |
| 19.1 | X |
| 19.1 | X |

|      |   |
|------|---|
| 19.1 | X |
| 19.7 | X |
| 32.4 | X |
| 49.2 | X |
| 39.5 | X |
| 37.8 | X |
| 23.9 | X |
| 51.4 | X |
| 24.3 | X |
| 35.9 | X |
| 36.7 | X |

|      |   |
|------|---|
| 34.9 | X |
| 27.2 | X |
| 34.6 | X |
| 25.8 | X |
| 21   | X |
| 29.2 | X |
| 18.9 | X |

---
